# Supplementary material for: Meta-analysis of Inter-species Liver Co-expression Networks Elucidates Traits Associated with Common Human Diseases
Source: PubMed Central journal article supplement (PMC2787626; doi:10.1371/journal.pcbi.1000616), 2009-12-18

## Expression data simulation

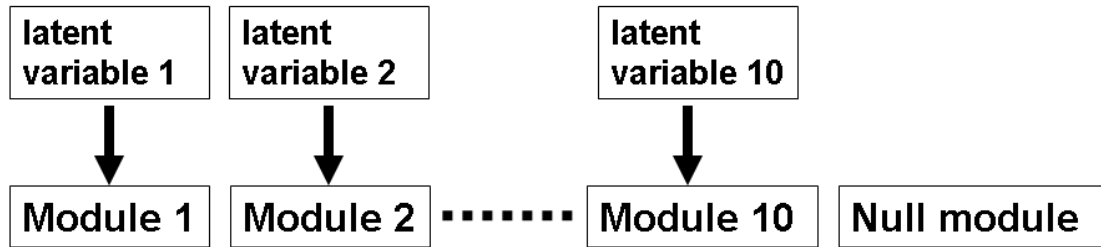

Supplement: pcbi.1000616.s002.pdf [file pcbi.1000616.s002.pdf]
