# Supplementary material for: Meta-analysis of Inter-species Liver Co-expression Networks Elucidates Traits Associated with Common Human Diseases
Source: PLoS Comput Biol. 2009 Dec 18;5(12):e1000616. doi: 10.1371/journal.pcbi.1000616 (PMC2787626; doi:10.1371/journal.pcbi.1000616)
Supplement: Table S1 — Summary of the pros and cons of existing meta-analysis methods (0.03 MB PDF) [file pcbi.1000616.s009.pdf]

| Method                 | Pros                                                                                                                              | Cons                                                                                                                                                                                                                            |
|------------------------|-----------------------------------------------------------------------------------------------------------------------------------|---------------------------------------------------------------------------------------------------------------------------------------------------------------------------------------------------------------------------------|
| Combining P-values [1] |                                                                                                                                   | <ul style="list-style-type: none"> <li>• Over non-conservative</li> </ul>                                                                                                                                                       |
| Fisher-Z [2]           | <ul style="list-style-type: none"> <li>• Increased power</li> <li>• Mean effect size</li> <li>• Heterogeneity estimate</li> </ul> | <ul style="list-style-type: none"> <li>• Globally defined effect size</li> <li>• Assume correlations are comparable across different systems</li> <li>• REM has less assumptions but with dramatically reduced power</li> </ul> |
| Order statistics [3]   | <ul style="list-style-type: none"> <li>• Assumption free</li> <li>• Effect size is gene context specific</li> </ul>               | <ul style="list-style-type: none"> <li>• Less power</li> <li>• Lack of the concept of a mean effect size</li> <li>• No heterogeneity measurement</li> </ul>                                                                     |

### References:

1. Hong F, Breitling R (2008) A comparison of meta-analysis methods for detecting differentially expressed genes in microarray experiments. *Bioinformatics* 24: 374-382.
2. Hu P, Greenwood CM, Beyene J (2005) Integrative analysis of multiple gene expression profiles with quality-adjusted effect size models. *BMC Bioinformatics* 6: 128.
3. Stuart JM, Segal E, Koller D, Kim SK (2003) A Gene-Coexpression Network for Global Discovery of Conserved Genetic Modules. *Science* 302: 249-255.
