# Supplementary material for: Meta-analysis of Inter-species Liver Co-expression Networks Elucidates Traits Associated with Common Human Diseases
Source: PLoS Comput Biol. 2009 Dec 18;5(12):e1000616. doi: 10.1371/journal.pcbi.1000616 (PMC2787626; doi:10.1371/journal.pcbi.1000616)
Supplement: Table S2 — 6455 orthologous genes among human, mouse and rat used in the analysis. (1.42 MB XLS) [file pcbi.1000616.s010.xls]

## Sheet: Table_S1
Table S2. List of 6,455 orhtologous genes between human, mouse and rat. RefSeq ID and symbol for each gene in the three species are shown. If a gene belongs to a co-expression module in human, mouse, rat or conserved co-expression network, the module ID is also shown; otherwise indicated as '-'.
Human ID	Human Symbol	Mouse ID	Mouse Symbol	Rat ID	Rat Symbol	Human Module #	Mouse Module #	Rat Module #	Conserved Module #
NP_036222	MACF1	XP_001472726	Macf1	XP_001055153	---	6	-	1	5
NP_065816	ZUBR1	---	Zubr1	NP_001034115	---	23	-	-	-
NP_000072	LYST	NP_034878	Lyst	NP_445970	Lyst	2	-	-	-
NP_056193	VPS13D	XP_001002285	Vps13d	XP_001073610	Vps13d_predicted	-	3	26	1
NP_955374	CCDC23	NP_001034087	Ccdc23	NP_001034081	Ccdc23	-	2	5	12
NP_776169	NEGR1	NP_001034183	Negr1	NP_067714	Negr1	10	-	1	-
NP_114127	ATAD3B	NP_849534	Atad3a	NP_001030094	Atad3a	23	-	1	2
NP_004485	HDGF	NP_032257	Hdgf	NP_446159	Hdgf	3	-	10	7
NP_443175	FAM46B	NP_780516	4732473B16Rik	XP_001065098	RGD1308967_predicted	-	2	12	-
NP_060307	PIGV	NP_848813	Pigv	NP_001010966	Pigv	1	-	-	2
NP_444280	C1orf142	NP_653104	1110031B06Rik	NP_955421	RGD735194	29	-	21	2
NP_056442	LDLRAP1	NP_663529	Ldlrap1	XP_001067557	RGD1563417_predicted	20	2	-	5
NP_055412	DNTTIP2	NP_722501	Dnttip2	---	---	3	4	1	3
NP_112195	C1orf14	NP_001028334	1700012A16Rik	XP_001071379	RGD1305609_predicted	10	-	-	1
NP_828847	CYP4X1	NP_001003947	Cyp4x1	NP_663708	---	1	2	-	1
NP_004064	PLK3	NP_038835	Plk3	XP_001071757	Plk3	17	5	1	5
NP_001026910	MANEAL	NP_001007574	Gm50	XP_001056614	RGD1563973_predicted	2	-	-	1
NP_612355	KIAA2013	NP_084117	2510039O18Rik	XP_001074867	RGD1305350_predicted	3	8	-	3
NP_001036194	FGR	NP_034338	Fgr	NP_077059	Fgr	1	3	3	6
NP_057629	IER5	NP_034630	Ier5	NP_001020308	Ier5	21	2	-	5
NP_031391	PADI2	NP_032838	Padi2	NP_058922	Padi2	11	2	5	6
NP_060510	GPATCH2	NP_080643	Gpatch2	NP_001011909	Gpatc2	-	-	29	3
NP_612122	BNIPL	NP_599014	Bnipl	---	---	-	-	2	1
NP_001452	FMO5	NP_034362	Fmo5	NP_653340	Fmo5	1	4	-	4
NP_003657	BLZF1	NP_079781	Blzf1	NP_001017494	---	2	1	1	3
NP_000560	FCGR3A	NP_653142	Fcgr3a	NP_997486	Fcgr3a	5	2	3	6
NP_001077432	TDRKH	NP_082583	Tdrkh	XP_001053329	RGD1311196	-	-	7	3
NP_060571	CDCA8	NP_080836	Cdca8	NP_001020221	---	-	2	2	10
NP_001008493	ENAH	NP_001076589	Enah	NP_001012150	Enah	6	2	34	-
NP_003106	UAP1	NP_598567	Uap1	XP_001072323	RGD1561967_predicted	4	5	1	5
NP_009190	VPS45	NP_038869	Vps45	NP_742069	Vps45	-	-	1	2
NP_005332	ZBTB48	NP_598640	Zbtb48	XP_001075474	Hkr3	2	8	-	-
NP_115724	MXRA8	NP_077225	Mxra8	NP_001007003	---	13	2	-	7
NP_001034800	DEDD	NP_035745	Dedd	NP_113988	Dedd	1	3	-	3
NP_068777	HLX1	NP_032276	Hlx1	NP_001071142	Hlx1_predicted	3	-	1	7
NP_477515	UBE2J2	NP_001034246	Ube2j2	NP_001007656	---	19	-	1	2
NP_002575	PAX7	NP_035169	Pax7	XP_001071787	RGD1564360_predicted	4	7	-	1
NP_036519	PADI4	NP_035191	Padi4	NP_058923	Padi4	-	-	-	6
NP_001757	CD1D	NP_031666	Cd1d2	NP_058775	Cd1d1	-	-	1	2
NP_001013682	FRRS1	NP_033172	Frrs1	XP_001073918	Sdfr2_predicted	-	-	-	3
NP_001010883	FAM102B	XP_283903	B430201A12Rik	XP_001072157	RGD1310037_predicted	5	2	-	6
NP_001013663	RP11-169K16.3	NP_666099	BC025833	XP_001072960	RGD1566169_predicted	2	-	-	-
NP_001014980	FAM132A	NP_080401	C1qdc2	XP_001077774	RGD1307059_predicted	1	-	4	1
NP_001019765	C1orf53	NP_001074695	2310009B15Rik	XP_001066661	RGD1566099_predicted	7	3	-	-
NP_997239	C1orf174	NP_780496	A430005L14Rik	NP_001009711	RGD1304567	-	1	-	-
NP_055816	SPEN	NP_062737	Spen	XP_001072589	---	-	-	4	1
NP_055625	CEP350	XP_129509	Cep350	XP_001067472	Cap350	2	-	37	3
NP_077719	NOTCH2	NP_035058	Notch2	NP_077334	Notch2	2	15	2	1
NP_002472	PPP1R12B	NP_001074776	Ppp1r12b	XP_001062402	Ppp1r12b_predicted	-	-	-	1
NP_060606	ASPM	NP_033921	Aspm	XP_001067212	Aspm_predicted	-	2	32	10
NP_057427	CENPF	NP_001074832	Cenpf	XP_001067266	Cenpf	11	-	2	10
NP_056372	CHD5	NP_001074845	Chd5	XP_001076622	---	1	-	1	1
NP_004949	FRAP1	NP_064393	Frap1	NP_063971	Frap1	15	-	1	4
XP_089281	C1orf184	XP_001000586	Gm207	XP_001074994	RGD1564106_predicted	1	3	20	1
NP_006006	ARID1A	NP_001074288	Arid1a	XP_001065794	Arid1a_predicted	-	3	-	-
NP_003598	CDC42BPA	XP_980946	Cdc42bpa	NP_446109	Cdc42bpa	6	-	-	1
NP_056190	RIPK5	NP_766104	Ripk5	NP_955750	Ripk5	9	-	29	4
NP_002831	PTPRF	NP_035343	Ptprf	NP_062122	Ptprf	17	3	1	-
NP_056384	DNM3	NP_001033708	Dnm3	NP_612547	Dnm3	-	-	2	1
NP_003283	TPR	NP_598541	Tpr	XP_001070158	Tpr	-	2	11	3
NP_000564	CR1	NP_038527	Crry	NP_001005265	Crry	5	1	2	6
NP_000019	AGL	NP_001074795	Agl	XP_001073642	Agl_predicted	1	-	-	-
NP_000341	ABCA4	NP_031404	Abca4	XP_001074129	Abca4_predicted	22	3	-	1
NP_112180	SNX27	NP_001075953	Snx27	NP_690060	Snx27	-	4	-	2
NP_000712	CACNA1E	NP_033912	Cacna1e	NP_062167	Cacna1e	-	-	8	1
NP_005086	ZMYM4	---	Zmym4	XP_001058886	---	6	11	25	2
NP_071366	FAM129A	NP_071301	Niban	NP_071578	Niban	9	2	14	6
NP_000121	F5	NP_032002	F5	NP_001041343	---	1	2	-	-
NP_055599	ARHGEF11	NP_001003912	Arhgef11	NP_076472	Arhgef11	2	-	10	-
NP_009044	TCHH	XP_001000857	Tchh	XP_001054694	Thh_predicted	-	-	1	3
NP_036394	HS2ST1	NP_035958	Hs2st1	XP_001079125	Hs2st1	7	3	12	-
NP_001020278	ADAR	NP_001033676	Adar	NP_112268	Adar	-	5	-	5
NP_001845	COL11A1	NP_031755	Col11a1	XP_001072431	Col11a1	-	-	3	6
NP_058515	PER3	NP_035197	Per3	NP_076468	Per3	1	2	14	4
NP_065173	PTGFRN	NP_035327	Ptgfrn	NP_062116	Ptgfrn	1	1	-	-
NP_005948	MTHFR	NP_034970	Mthfr	XP_001074061	Mthfr_predicted	-	14	8	1
NP_001077090	ZBTB40	NP_937891	Zbtb40	XP_001070250	Zbtb40_predicted	7	-	1	-
NP_057458	ARID4B	NP_919238	Arid4b	NP_445873	Arid4b	2	1	-	3
NP_060620	C1orf164	NP_080015	4931406I20Rik	---	---	6	8	-	-
NP_008965	DNAJB4	NP_080202	Dnajb4	NP_001013094	Dnajb4	4	1	9	5
NP_000706	C4BPA	NP_031602	C4bp	NP_036648	C4bpa	-	3	-	8
NP_006753	LAPTM5	NP_034816	Laptm5	NP_445990	Laptm5	5	2	3	6
NP_003030	SLC2A5	NP_062715	Slc2a5	NP_113929	Slc2a5	-	-	18	1
NP_000438	PSEN2	NP_035313	Psen2	NP_112349	Psen2	9	1	-	-
NP_004772	VAMP3	NP_033524	Vamp3	NP_476438	Vamp3	-	-	27	-
NP_002473	NASP	NP_001074944	Nasp	NP_001005543	Nasp	-	10	1	2
NP_079034	AGMAT	NP_001074877	Agmat	NP_001041650	Agmat	-	-	-	4
NP_001095866	---	NP_079955	5730470L24Rik	NP_001012182	RGD1311316	-	-	1	3
NP_689494	SCYL1BP1	NP_849214	Scyl1bp1	XP_001074948	---	2	1	-	3
NP_000007	ACADM	NP_031408	Acadm	NP_058682	Acadm	1	1	1	4
NP_848643	TFAP2E	NP_945198	Tcfap2e	XP_233526	Tcfap2e_predicted	-	13	2	1
NP_115699	TMEM79	NP_077208	Tmem79	NP_001029068	RGD1309886	1	-	10	1
NP_001018077	SERBP1	NP_080090	Serbp1	NP_659554	Serbp1	-	1	-	5
NP_002384	MDM4	NP_032601	Mdm4	NP_001012026	Mdm4	-	-	-	-
NP_001041675	CLCC1	NP_663518	Clcc1	NP_596905	Clcc1	3	1	-	3
NP_060523	XKR8	NP_958756	Xkr8	NP_001012099	Xkr8	1	-	-	-
NP_001001787	ATP1B1	NP_033851	Atp1b1	NP_037245	Atp1b1	-	4	15	5
NP_005885	CD5L	NP_033820	Cd5l	NP_001020856	Cd5l	5	2	3	6
NP_001616	AK2	NP_001029138	Ak2	NP_001029139	Ak2	-	1	33	-
NP_001004023	DYRK3	NP_663483	Dyrk3	NP_001019938	Dyrk3	4	15	-	-
NP_001984	F3	NP_034301	F3	NP_037189	F3	-	5	34	5
NP_004412	DVL1	NP_034221	Dvl1	NP_114008	Dvl1	9	-	-	1
NP_689704	---	NP_835180	4732466D17Rik	XP_001059366	RGD1564063_predicted	22	16	1	4
NP_078802	EPS8L3	NP_598628	Eps8l3	XP_001068536	Eps8l3_predicted	1	-	6	7
NP_001018063	PFKFB2	NP_032851	Pfkfb2	NP_001029136	Pfkfb2	-	2	-	-
NP_004965	KCNA2	NP_032443	Kcna2	NP_037102	Kcna2	-	13	-	1
NP_116182	MFSD2	NP_083938	Mfsd2	XP_001054640	RGD1310174_predicted	-	5	6	5
NP_055310	ANGPTL3	NP_038941	Angptl3	NP_001020236	---	1	8	1	4
NP_071361	GPATCH3	NP_766464	Gpatch3	XP_001065500	Gpatc3_predicted	18	-	10	4
NP_002012	FMO1	NP_034361	Fmo1	NP_036924	Fmo1	3	16	1	-
NP_079173	PAQR6	NP_940802	Paqr6	XP_001059976	---	2	2	-	7
NP_005272	GPR3	NP_032180	Gpr3	NP_714949	Gpr3	4	2	-	-
NP_057086	SCCPDH	NP_848768	Sccpdh	NP_001014007	Sccpdh	1	2	1	-
NP_694986	TTLL10	NP_083540	Ttll10	NP_001019929	Ttll10	-	12	-	1
NP_002605	PDZK1	NP_067492	Pdzk1	NP_113900	Pdzk1	1	-	-	4
NP_001093095	FAM54B	NP_084035	2410166I05Rik	NP_001013957	RGD1305453	3	-	-	4
NP_060341	CPSF3L	NP_082296	Cpsf3l	NP_001029064	RGD1306841	4	-	1	4
NP_001253	CDKN2C	NP_031697	Cdkn2c	NP_571977	Cdkn2c	20	2	32	10
NP_060214	ST7L	NP_694731	St7l	NP_001007640	St7l	1	1	-	-
NP_444281	TADA1L	NP_084521	Tada1l	XP_001063180	Tada1l	1	-	-	-
NP_006760	LMO4	NP_034853	Lmo4	NP_001009708	Lmo4	-	1	-	2
NP_660150	PIGM	NP_080510	Pigm	NP_077058	Pigm	3	-	-	12
NP_112242	ISG20L2	NP_808331	Isg20l2	NP_001007742	Isg20l2	3	1	9	3
NP_689582	SLC44A3	NP_663369	Slc44a3	NP_001013936	RGD1305808	-	2	2	-
NP_079504	TRAF3IP3	NP_694777	Traf3ip3	NP_001014154	Traf3ip3	5	-	3	6
NP_003667	DEGS1	NP_031879	Degs1	NP_445775	Degs1	3	9	12	-
NP_036465	MYCBP	NP_062634	Mycbp	---	---	3	1	1	2
NP_079177	DENND2D	NP_001087223	Dennd2d	XP_001069980	Dennd2d_predicted	-	1	2	-
NP_005509	HMGCS2	NP_032282	Hmgcs2	NP_775117	Hmgcs2	1	3	-	8
NP_001032252	SUSD4	NP_659045	Susd4	XP_001063664	RGD1564043_predicted	-	2	2	1
NP_001981	EYA3	NP_034296	Eya3	XP_001064052	Eya3_predicted	-	2	-	-
NP_001001651	MED8	NP_064384	Med8	XP_001072348	Med8_predicted	19	-	1	2
NP_001830	CNN3	NP_082320	Cnn3	NP_062232	Cnn3	2	-	14	5
NP_001545	CYR61	NP_034646	Cyr61	NP_112617	Cyr61	21	4	-	5
NP_002608	PEX10	NP_001035866	Pex10	XP_001057106	---	-	3	-	2
NP_071766	TOR3A	NP_075630	Tor3a	NP_001009683	Tor3a	-	3	14	5
NP_001002294	FMO3	NP_032056	Fmo3	NP_445885	Fmo3	1	-	6	4
NP_940948	SPATA21	NP_808535	Spata21	NP_001004447	Spata21	7	3	-	1
NP_001036236	LCK	NP_034823	Lck	XP_001061667	---	-	2	3	6
NP_005207	DDOST	NP_031864	Ddost	NP_001012104	Ddost_predicted	2	-	17	2
NP_689703	B3GALNT2	NP_848755	B3galnt2	---	---	3	1	-	-
NP_003263	GPR137B	NP_114388	Gpr137b	XP_001053721	Gpr137b_predicted	6	2	7	6
NP_849196	SERINC2	NP_766290	Serinc2	NP_001026826	Serinc2	1	1	4	1
NP_000862	HTR6	NP_067333	Htr6	NP_077341	Htr6	2	1	4	1
NP_054772	---	NP_001074728	9630055N22Rik	---	---	1	2	-	-
NP_001220	CASP9	NP_056548	Casp9	NP_113820	Casp9	-	-	-	-
NP_699172	IBRDC3	XP_204030	Ibrdc3	XP_001060328	Ibrdc3_predicted	21	-	5	5
NP_005708	ARPC5	NP_080645	Arpc5	NP_001020888	Arpc5	2	3	5	3
NP_001007256	---	NP_001028211	1190002J23Rik	XP_001053853	RGD1561025_predicted	1	-	-	12
NP_006841	IL24	NP_444325	Il24	NP_579845	Il24	-	-	-	1
NP_001036158	---	NP_001092773	---	XP_001067092	---	16	-	2	1
NP_788954	C1orf179	NP_666261	BC026682	NP_001005558	---	-	7	-	6
XP_934560	PCP4L1	XP_484933	Pcp4l1	XP_001053660	---	-	-	-	12
NP_078871	C1orf108	NP_075912	6330407G11Rik	NP_001025225	---	20	1	1	5
NP_000948	PTGER3	NP_035326	Ptger3	NP_036836	Ptger3	2	-	1	-
NP_001071096	APH1A	NP_666216	Aph1a	NP_001014277	Aph1a	-	1	9	2
NP_061905	ADAMTSL4	NP_659148	Adamtsl4	NP_001029184	Adamtsl4	30	-	18	-
NP_660320	HFE2	NP_081402	Hfe2	NP_001012080	Hfe2	1	8	-	4
NP_653174	NEXN	NP_955759	Nexn	NP_631976	Nexn	-	6	-	7
NP_061962	HES2	NP_032262	Hes2	NP_062109	Hes2	1	-	-	1
NP_001008800	CCT3	NP_033966	Cct3	NP_954522	Cct3	3	16	1	3
NP_443197	C1orf19	NP_079953	5730449L18Rik	XP_001066199	RGD1308584_predicted	3	5	-	5
NP_001267	CHI3L1	NP_031721	Chi3l1	NP_446012	Chi3l1	1	-	5	5
NP_001026970	TIPRL	NP_663488	Tiprl	XP_001075447	---	29	1	1	-
NP_149056	DMRTB1	XP_205469	Dmrtb1	XP_001066505	RGD1560921_predicted	10	12	-	2
NP_660286	OMA1	NP_080185	Oma1	XP_001063646	Oma1_predicted	4	1	7	2
NP_004556	PEX14	NP_062755	Pex14	NP_742060	Pex14	3	-	-	2
NP_001025458	ATF3	NP_031524	Atf3	NP_037044	Atf3	17	6	1	5
NP_056405	GPATCH4	NP_079939	Gpatc4	NP_001020150	RGD1311086	1	-	1	2
NP_006504	SARS	NP_035449	Sars	NP_001007607	Sars1	1	-	1	-
NP_002236	KCNK1	NP_032456	Kcnk1	NP_067720	Kcnk1	8	-	3	6
---	---	NP_035400	Rhd	NP_071950	Rhced	1	14	-	1
NP_001880	CRYZ	NP_034098	Cryz	NP_001012183	Cryz	4	18	25	4
NP_060761	---	NP_083623	2310009E04Rik	NP_001013954	---	-	16	26	4
NP_003984	CLK2	NP_031738	Clk2	NP_001014276	---	4	5	-	2
NP_005473	PIGK	NP_079938	Pigk	NP_001011953	Pigk	4	-	1	-
NP_003663	CDC14A	NP_001074287	Cdc14a	XP_001073006	Cdc14a_predicted	1	8	-	-
NP_115508	HORMAD1	NP_080765	Hormad1	XP_001060782	Hormad1_predicted	11	-	-	1
NP_000630	FASLG	NP_034307	Fasl	NP_037040	Faslg	5	-	3	6
NP_001072983	TBCE	NP_848027	Tbce	NP_001012161	Tbce	3	-	7	3
NP_000766	CYP2J2	NP_001093652	---	XP_001058738	RGD1561242_predicted	1	1	-	-
NP_000783	DIO1	NP_031886	Dio1	NP_067685	Dio1	7	-	-	4
NP_006459	POLR3C	XP_131049	Polr3c	NP_001012081	Polr3c	-	8	20	3
NP_444283	THEM4	NP_083707	Them4	NP_001020188	Them4	-	2	1	-
NP_113611	NUF2	NP_075773	Nuf2	NP_001012028	Cdca1	-	2	2	10
---	---	NP_075029	Rpl23	NP_001007600	Rpl23	1	3	1	2
NP_001001523	RORC	NP_035411	Rorc	XP_001058675	---	3	16	1	5
NP_001004303	C1orf168	XP_161350	1700024P16Rik	XP_001064051	RGD1564074_predicted	1	2	-	-
NP_001028753	PRKCZ	NP_001034168	Prkcz	NP_071952	Prkcz	2	-	-	-
NP_002576	PBX1	NP_032809	Pbx1	XP_001072172	Pbx1_predicted	16	-	-	-
NP_073624	NMNAT1	NP_597679	Nmnat1	NP_001032645	Nmnat1	-	1	31	-
NP_057060	SNX7	NP_083931	Snx7	NP_001012083	Snx7	2	3	2	3
NP_078902	VTCN1	NP_848709	Vtcn1	NP_001019415	Vtcn1	5	3	-	1
NP_073568	NUCKS1	NP_780503	Nucks1	NP_073636	Nucks	19	1	27	-
NP_689578	C1orf172	NP_001077385	1810019J16Rik	NP_001004268	RGD1303271	8	-	-	5
NP_060526	TMEM39B	NP_955009	Tmem39b	NP_001014214	Tmem39b	1	1	-	5
NP_065140	RHBG	NP_067350	Rhbg	NP_898877	Rhbg	1	8	-	-
NP_000731	CHRM3	NP_150372	Chrm3	NP_036659	Chrm3	-	7	-	-
NP_006483	ALX3	NP_031467	Alx3	NP_001007013	---	-	-	1	-
NP_064575	OLFML3	NP_598620	Olfml3	XP_001064747	Olfml3_predicted	5	2	1	7
NP_115977	TRIM63	NP_001034137	Trim63	NP_543179	Trim63	-	-	-	1
NP_004988	MYBPH	NP_058029	Mybph	NP_114001	Mybph	8	-	-	-
NP_001036011	ATPAF1	NP_851383	Atpaf1	XP_001070312	Atpaf1_predicted	24	2	1	-
NP_003559	ANXA9	NP_001078852	Anxa9	XP_001055850	---	3	2	1	-
NP_036245	CA14	NP_035927	Car14	---	---	1	16	1	4
NP_061946	SPATA6	NP_080746	Spata6	NP_599219	Spata6	-	2	34	6
NP_116247	MAEL	NP_780505	Mael	XP_001075736	Mael_predicted	-	-	-	1
NP_001009598	RXRG	NP_033133	Rxrg	NP_113953	Rxrg	-	4	-	2
NP_001029195	DMAP1	NP_075667	Dmap1	NP_001015006	Dmap1	20	1	-	5
NP_002937	RPA2	NP_035414	Rpa2	NP_067593	Rpa2	2	11	1	10
NP_443172	LRRC42	NP_084261	Lrrc42	NP_001020824	Lrrc42	2	11	2	-
NP_001451	FMO2	NP_061369	Fmo2	NP_653338	Fmo2	-	-	6	5
NP_038469	DSCR1L2	NP_075356	Dscr1l2	NP_001012764	Dscr1l2	-	3	-	1
NP_000387	CTSK	NP_031828	Ctsk	NP_113748	Ctsk	32	2	-	-
NP_037460	PYCR2	NP_598466	Pycr2	NP_001012208	Pycr2	-	1	1	-
NP_003229	TGFB2	NP_033393	Tgfb2	NP_112393	Tgfb2	5	13	-	7
NP_612426	KTI12	NP_083847	Kti12	NP_001037753	---	3	-	1	2
NP_056424	C1orf144	NP_001020779	D4Ertd22e	XP_001072503	RGD1560286_predicted	-	8	-	2
NP_115633	ZMYND12	NP_001014900	Zmynd12	XP_001073920	Zmynd12_predicted	1	-	-	4
NP_001893	CTH	NP_666065	Cth	NP_058770	Cth	1	4	-	4
NP_001246	CDC20	NP_075712	Cdc20	NP_741990	Cdc20	2	2	2	10
NP_004883	SEC22B	NP_035472	Sec22b	NP_001020857	Sec22l1	3	1	1	3
NP_000725	CD247	NP_112439	Cd247	NP_740770	Cd3z	5	-	3	6
NP_055098	C1orf9	XP_001479544	AI848100	NP_955435	Dd25	3	5	-	3
NP_940905	KCNT2	NP_001074496	Kcnt2	NP_942057	Kcnt2	-	-	-	1
NP_005911	MEF2D	NP_598426	Mef2d	NP_110487	Mef2d	-	3	-	-
NP_055616	PCNXL2	NP_780770	E330039K12Rik	XP_001055579	RGD1305883_predicted	10	-	-	-
NP_002212	ITPKB	NP_001074644	Itpkb	NP_062185	Itpkb	3	2	-	6
NP_598003	SLC30A7	NP_075703	Slc30a7	XP_001073594	Slc30a7	3	1	1	3
NP_003608	RGS5	NP_033089	Rgs5	NP_062214	Rgs5	-	-	-	-
NP_065859	SIPA1L2	NP_001074806	Sipa1l2	NP_001009704	Sipa1l2	1	5	-	1
NP_060179	FAM46C	---	4930431B09Rik	NP_001014063	---	-	5	-	5
NP_775179	SMG7	NP_001005507	Smg7	XP_001071081	Smg7_predicted	-	-	-	5
NP_054740	SSX2IP	NP_620083	Ssx2ip	NP_783187	Ssx2ip	-	1	-	-
NP_003620	PIK3R3	NP_853616	Pik3r3	NP_071549	Pik3r3	5	-	-	1
NP_005695	PTPRU	NP_001076588	Ptpru	XP_001063025	Ptpru	-	1	-	2
NP_006608	NES	NP_057910	Nes	NP_037119	Nes	12	2	23	1
NP_001277	CLCN6	NP_036059	Clcn6	XP_001074014	Clcn6_predicted	-	2	16	11
NP_006039	UBE4B	NP_071305	Ube4b	XP_001075491	Ube4b_predicted	20	-	10	-
NP_001077393	C1orf116	NP_808272	AA986860	XP_001058496	---	14	5	6	5
NP_005390	PRKAB2	NP_892042	Prkab2	NP_072149	Prkab2	1	2	-	1
NP_006690	MAN1A2	NP_034893	Man1a2	XP_001062587	Man1a2_predicted	2	1	-	-
NP_071334	EGLN1	NP_444437	Egln1	NP_848017	Egln1	2	-	-	3
NP_997191	NUP210L	XP_001479513	Nup210l	XP_001074975	RGD1310250_predicted	-	-	-	1
NP_056018	KIAA0460	NP_001074762	4930535B03Rik	---	---	-	-	11	5
NP_689493	SYT11	NP_061274	Syt11	NP_113855	Syt11	5	-	2	1
NP_787072	EXOC8	NP_932771	Exoc8	NP_620612	Exoc8	2	-	11	5
NP_003813	NR5A2	NP_109601	Nr5a2	NP_068510	Nr5a2	-	6	-	-
NP_004832	RASAL2	NP_808312	Rasal2	XP_001073199	Rasal2_predicted	2	2	-	1
NP_004424	ELF3	NP_031947	Elf3	NP_001019939	Elf3	21	2	-	5
NP_055917	NPHP4	NP_700473	Nphp4	XP_001076700	---	-	-	-	-
NP_001006944	EPHA8	NP_031965	Epha8	XP_001069777	Epha8	2	13	-	1
NP_003670	KMO	NP_598570	Kmo	NP_067604	Kmo	1	-	1	12
NP_001071168	MIER1	NP_001034170	Mier1	XP_001058293	RGD1562337_predicted	6	1	1	2
NP_733750	INADL	NP_001005784	Inadl	XP_001055385	RGD1565362_predicted	-	15	-	3
NP_001659	ARNT	NP_001032826	Arnt	NP_036912	Arnt	3	11	12	-
NP_079150	KIAA0319L	NP_001030602	AU040320	---	---	-	15	-	-
NP_003276	TNR	NP_071707	Tnr	NP_037177	Tnr	11	-	-	1
NP_065754	AMIGO1	NP_001004293	Amigo1	NP_996764	---	-	12	-	-
NP_477518	OLFM3	NP_694797	Olfm3	NP_665720	Olfm3	-	-	2	1
NP_201576	CENPL	NP_081705	Cenpl	NP_001028233	RGD1311868	-	-	2	4
NP_001073866	SLC45A1	NP_776135	Slc45a1	NP_653348	Slc45a1	9	2	-	-
NP_694991	MCOLN2	NP_001005846	Mcoln2	NP_001034094	Mcoln2	5	1	3	6
NP_056321	MMACHC	NP_080238	Mmachc	XP_001066599	Mmachc_predicted	-	-	-	-
NP_055868	PPFIA4	XP_001478045	Ppfia4	XP_001061955	Ppfia4	1	-	2	1
NP_116145	HPDL	NP_666368	Hpdl	NP_001014090	Gloxd1	1	-	9	5
NP_000563	IL10	NP_034678	Il10	NP_036986	Il10	-	-	3	6
NP_000558	CRP	NP_031794	Crp	NP_058792	Crp	1	1	-	4
NP_075565	C1orf163	NP_081526	2010305A19Rik	XP_001066987	RGD1305274_predicted	3	-	-	-
NP_037462	NME7	NP_612187	Nme7	NP_612541	Nme7	2	-	-	12
NP_057358	PLEKHO1	NP_075809	Plekho1	NP_001020290	RGD1311487	13	2	3	6
NP_057589	ZCCHC17	NP_694800	Zcchc17	XP_001062322	RGD1565267_predicted	-	1	-	2
NP_002052	GCLM	NP_032155	Gclm	NP_059001	Gclm	6	-	10	8
NP_005689	SCAMP3	NP_036016	Scamp3	XP_001074344	Scamp3	2	8	-	2
NP_653181	C1orf85	NP_064387	0610031J06Rik	NP_001004226	RGD1303130	3	1	1	-
NP_004623	DAP3	NP_075370	Dap3	NP_001011950	Dap3	3	-	1	2
NP_060368	MOSC2	NP_598445	Mosc2	NP_599237	Mosc2	1	3	1	8
NP_004419	EFNA1	NP_034237	Efna1	NP_446051	Efna1	-	-	-	4
NP_001516	HCRTR1	NP_945197	Hcrtr1	NP_037196	Hcrtr1	11	2	-	1
NP_000182	HMGCL	NP_032280	Hmgcl	NP_077362	Hmgcl	1	8	14	4
NP_001092086	C1orf43	NP_080038	4933434E20Rik	NP_997490	Ns5atp4	25	1	-	3
NP_003720	RTCD1	NP_079793	Rtcd1	NP_001004227	Rtcd1	2	-	1	3
NP_067017	SLC30A1	NP_033605	Slc30a1	NP_074044	Slc30a1	7	-	-	3
NP_115501	C1orf160	NP_079943	D4Ertd196e	XP_001066468	RGD1304793_predicted	15	-	1	2
NP_057093	SH3GLB1	NP_062337	Sh3glb1	NP_001011929	Sh3glb1	3	12	2	3
NP_036528	PHLDA3	NP_038778	Phlda3	NP_001012206	Phlda3	5	2	-	7
NP_061329	GNG12	NP_079554	Gng12	XP_001067408	Gng12	2	2	-	1
NP_000748	CSF1	NP_031804	Csf1	NP_076471	Csf1	4	3	31	1
NP_001070730	UBXD5	NP_080533	Ubxd5	NP_620208	Ubxd5	3	2	-	-
NP_775913	FAM80A	NP_808240	BC057371	XP_001073980	RGD1306880_predicted	-	-	-	1
NP_004573	RABGGTB	NP_035361	Rabggtb	NP_619715	Rabggtb	3	1	-	3
NP_001074941	SPATA1	NP_081893	Spata1	NP_001014199	---	-	-	-	3
NP_115811	---	NP_663583	BC021891	XP_226572	RGD1306091_predicted	2	2	-	-
NP_056142	SMG5	NP_839977	Smg5	XP_001059906	---	4	1	1	2
NP_115667	SGIP1	NP_659155	Sgip1	XP_001058167	RGD1564957_predicted	-	3	-	2
NP_001034553	C1orf175	XP_983216	Gm1027	NP_001094435	RGD1563440_predicted	-	-	9	-
NP_002232	KCNJ10	NP_001034573	Kcnj10	NP_113790	Kcnj10	5	-	-	6
NP_001026855	TP53BP2	NP_775554	Trp53bp2	XP_001063503	Trp53bp2_predicted	6	5	19	5
NP_065883	ZNF687	NP_084350	Zfp687	---	---	-	13	-	-
NP_859063	ANKRD38	NP_766460	Ankrd38	XP_001059919	BC060737_predicted	1	-	-	-
NP_055832	USP33	NP_001070144	Usp33	---	Usp33	4	-	-	-
NP_000954	PTGS2	NP_035328	Ptgs2	NP_058928	Ptgs2	21	-	5	4
NP_950245	NSUN4	NP_082418	Nsun4	XP_001070636	Nsun4_predicted	-	3	-	-
NP_055478	JMJD2A	NP_759014	Jmjd2a	XP_001072204	Jmjd2a_predicted	-	16	-	-
NP_004472	GALNT2	NP_644678	Galnt2	XP_001054081	Galnt2_predicted	1	-	4	1
NP_112196	C1orf25	NP_081152	1190005F20Rik	NP_001032269	RGD1307890	4	-	-	2
NP_690048	PDIK1L	NP_666268	Pdik1l	XP_001068002	Pdik1l_predicted	4	13	-	-
NP_061174	CTTNBP2NL	NP_084525	Cttnbp2nl	XP_001066527	Cttnbp2nl_predicted	5	6	17	6
NP_002635	PIGR	NP_035212	Pigr	NP_036855	Pigr	5	1	1	9
NP_055862	KIAA0090	NP_001034289	C230096C10Rik	XP_001071619	RGD1310427_predicted	19	-	5	6
NP_031401	TARDBP	NP_001003898	Tardbp	NP_001011979	Tardbp	-	-	-	4
NP_000897	NPR1	NP_032753	Npr1	NP_036745	Npr1	-	-	3	7
NP_079048	ZMYM1	NP_080946	Zmym1	XP_001058926	Zmym1_predicted	14	5	1	-
NP_003234	TGFBR3	NP_035708	Tgfbr3	NP_058952	Tgfbr3	-	1	-	-
NP_036556	RPS6KC1	NP_848890	Rps6kc1	XP_001053120	Rps6kc1	2	15	20	1
NP_001348	DHX9	NP_031868	Dhx9	XP_001066523	Dhx9_predicted	-	10	-	-
NP_000101	DPYD	NP_740748	Dpyd	NP_112289	Dpyd	1	1	1	4
NP_006460	IVNS1ABP	NP_001034600	Ivns1abp	NP_001040550	Ivns1abp_predicted	-	1	-	-
NP_004070	CTSS	NP_067256	Ctss	NP_059016	Ctss	6	2	3	6
NP_060724	RCOR3	NP_659063	Rcor3	---	---	-	4	-	2
NP_001003679	LEPR	NP_034834	Lepr	NP_036728	Lepr	1	-	19	4
NP_005677	SOX13	NP_035569	Sox13	XP_001060642	Sox13_predicted	-	4	-	5
NP_060890	SLC22A15	---	Slc22a15	XP_001066926	Slc22a15_predicted	12	8	-	-
NP_079436	WDR26	NP_663489	Wdr26	XP_001062709	RGD1565589_predicted	2	1	1	3
NP_060177	DDEFL1	NP_001008233	Ddefl1	XP_001069024	---	15	4	35	5
NP_001091	ACTA1	NP_033736	Acta1	NP_062085	Acta1	-	3	-	1
NP_004550	YBX1	NP_035862	Ybx1	NP_113751	Ybx1	3	4	1	-
NP_057575	MRPL37	NP_079776	Mrpl37	NP_001004235	Mrpl37	-	3	1	2
NP_872323	C1orf210	NP_079848	2610528J11Rik	XP_001072609	RGD1305347_predicted	3	1	9	4
NP_056022	OTUD3	XP_001477778	Otud3	XP_001071098	RGD1560468_predicted	-	-	1	4
NP_055673	TMCC2	NP_849205	Tmcc2	XP_001059693	RGD1311960_predicted	2	5	-	-
NP_004744	DHRS3	NP_035433	Dhrs3	NP_001032276	Dhrs3	4	1	22	4
NP_219486	C1orf156	NP_081555	2810422O20Rik	NP_001020839	RGD1306783	2	-	-	5
NP_073623	ARV1	NP_081131	Arv1	XP_001054399	Arv1_predicted	2	9	1	2
NP_057455	HSD17B7	NP_034606	Hsd17b7	NP_058931	Hsd17b7	-	4	16	11
NP_878258	SLC35E2	NP_796160	A530082C11Rik	XP_001077505	Slc35e2_predicted	2	11	-	-
NP_005516	HSD11B1	NP_001038216	Hsd11b1	NP_058776	Hsd11b1	1	-	36	8
NP_077272	CCDC28B	NP_079731	Ccdc28b	---	---	4	6	9	-
NP_001004434	SLC30A2	NP_001034766	Slc30a2	NP_001076591	Slc30a2	2	9	-	-
NP_002134	HPCA	NP_034601	Hpca	NP_058818	Hpca	1	-	4	-
NP_001070862	DPH5	NP_081469	Dph5	NP_001017449	Dph5	2	3	1	2
NP_536356	ACTRT2	NP_082789	Actrt2	NP_001013959	Actrt2	12	-	-	1
NP_115744	LZIC	NP_081239	Lzic	NP_001013259	Lzic	2	2	-	-
NP_006057	AKR1A1	NP_067448	Akr1a4	NP_112262	Akr1a1	1	-	1	2
NP_008964	RER1	NP_080671	Rer1	NP_001034101	RGD1306324	2	-	22	2
NP_000479	SERPINC1	NP_543120	Serpinc1	NP_001012027	Serpinc1	1	3	17	8
NP_005591	NIT1	NP_036179	Nit1	NP_001076049	Nit1	1	-	33	4
NP_001915	GADD45A	NP_031862	Gadd45a	NP_077041	Gadd45a	1	-	21	5
NP_787062	UHMK1	NP_034763	Uhmk1	NP_058989	Uhmk1	-	1	-	3
NP_002914	RGS2	NP_033087	Rgs2	NP_445905	Rgs2	17	2	5	6
NP_057136	RRP15	NP_080317	Rrp15	NP_001009702	RGD1306106	3	9	1	3
NP_001019903	MECR	NP_079573	Mecr	NP_058905	Mecr	19	1	-	2
NP_976310	TMEM81	NP_083301	Tmem81	NP_001017490	---	-	5	-	5
NP_001070937	NR1I3	NP_033933	Nr1i3	NP_075230	Nr1i3	1	12	-	12
NP_002913	RGS1	NP_056626	Rgs1	NP_062209	Rgs1	17	6	15	5
NP_848549	TMEM77	NP_001020753	Tmem77	NP_001020189	Tmem77	-	1	-	4
NP_006815	EBNA1BP2	NP_081208	Ebna1bp2	NP_001008721	Ebna1bp2	3	10	1	2
NP_001995	FDPS	NP_608219	Fdps	NP_114028	Fdps	23	8	16	11
NP_002801	PSMD4	NP_032977	Psmd4	NP_112621	Psmd4	6	18	1	3
NP_068779	MCL1	NP_032588	Mcl1	NP_068618	Mcl1	26	-	15	5
NP_055784	WDR47	NP_852065	Wdr47	XP_001071369	Wdr47	6	5	-	6
NP_065840	IGSF9	NP_291086	Igsf9	---	Igsf9_predicted	1	13	1	-
NP_064714	PAPPA2	NP_001078845	Pappa2	XP_001054790	---	-	-	-	1
NP_149118	LZTR2	NP_203505	Lztr2	NP_446023	Lztr2	1	-	-	4
NP_000219	LAMB3	NP_032510	Lamb3	XP_001069930	Lamb3	1	-	-	-
NP_000840	GSTM3	NP_034490	Gstm5	NP_742035	Gstm5	-	18	36	-
NP_073615	CCDC21	NP_653110	Ccdc21	NP_001073620	Ccdc21	-	-	-	4
NP_036269	DDAH1	NP_081269	Ddah1	NP_071633	Ddah1	7	10	-	-
NP_005830	SRRM1	NP_058079	Srrm1	XP_001069368	Srrm1_predicted	2	-	11	5
NP_001027902	USP48	NP_570949	Usp48	NP_942080	Usp48	-	-	37	5
NP_056541	WDR42A	NP_705783	Wdr42a	NP_001014253	RGD1308513	2	1	7	12
NP_001609	PARP1	NP_031441	Parp1	NP_037195	Parp1	3	10	1	2
NP_001007238	IGSF3	NP_997088	Igsf3	XP_001073927	---	1	-	40	1
NP_000441	SELE	NP_035475	Sele	NP_620234	Sele	-	3	40	1
NP_071372	ATP13A2	NP_083373	Atp13a2	XP_001072145	Atp13a2_predicted	4	2	5	6
NP_066016	MAGI3	NP_598614	Magi3	NP_620784	Magi3	-	1	27	-
NP_001026850	RUNX3	NP_062706	Runx3	NP_569109	Runx3	5	12	-	9
NP_001095132	NRD1	NP_666262	Nrd1	NP_037125	Nrd1	2	-	23	2
NP_003944	MPZL1	NP_001001880	Mpzl1	NP_001007729	---	3	1	5	-
NP_116189	C1orf198	NP_780358	2310022B05Rik	XP_001054336	RGD1559896_predicted	-	15	35	-
NP_003548	PIP5K1A	NP_032873	Pip5k1a	NP_001036086	Pip5k1b_predicted	-	5	39	1
NP_001057	TNFRSF1B	NP_035740	Tnfrsf1b	NP_569110	Tnfrsf1b	8	2	18	5
NP_001014839	NCDN	NP_036116	Ncdn	NP_445995	Ncdn	1	-	1	-
NP_073747	DCLRE1B	NP_001020483	Dclre1b	NP_001020858	Dclre1b	-	-	-	-
NP_722519	PHF13	NP_766293	Phf13	XP_001076262	Phf13_predicted	-	-	9	1
NP_000692	ATP1A1	NP_659149	Atp1a1	NP_036636	Atp1a1	1	1	-	-
NP_777596	PCSK9	NP_705793	Pcsk9	NP_954862	Pcsk9	-	2	16	11
NP_003729	PTCH2	NP_032984	Ptch2	XP_001071653	Ptch1_predicted	-	7	9	1
NP_055467	IPO13	NP_666264	Ipo13	NP_446230	Ipo13	7	1	1	2
NP_001017415	USP1	NP_666256	Usp1	NP_001015015	Usp1	2	1	1	3
NP_073572	ACBD3	NP_573488	Acbd3	NP_878263	Acbd3	2	3	30	3
NP_001073895	DUSP27	NP_001028516	Dusp27	XP_001071732	RGD1560598_predicted	-	7	-	1
NP_056422	C1orf77	XP_001476658	---	NP_001014197	---	1	-	-	2
NP_005863	BCAS2	NP_080878	Bcas2	XP_001064236	Bcas2_predicted	2	-	7	3
NP_114433	REG4	NP_080604	Reg4	NP_001004096	Reg4	23	7	22	1
NP_055954	SLC35D1	NP_808400	Slc35d1	XP_001063403	Slc35d1_predicted	-	-	1	5
NP_079341	BXDC5	NP_081608	Bxdc5	XP_001059406	---	3	2	1	3
NP_067056	DNASE2B	NP_064341	Dnase2b	NP_067696	Dnase2b	16	2	26	-
NP_009171	DUSP12	NP_075662	Dusp12	NP_071584	Dusp12	3	11	7	13
NP_060291	RHBDL2	---	---	XP_001055537	---	31	2	1	1
NP_036606	UCK2	NP_109649	Uck2	NP_001095878	Uck2	1	1	-	3
NP_004427	ENSA	NP_001021383	Ensa	NP_001029146	Ensa	-	2	9	-
NP_002565	PRDX1	NP_035164	Prdx1	NP_476455	Prdx1	-	3	-	8
NP_003753	VAMP4	NP_058076	Vamp4	XP_001070325	Vamp4_predicted	2	-	9	-
NP_002158	ID3	NP_032347	Id3	NP_037190	Id3	9	-	31	5
NP_001947	EDN2	NP_031928	Edn2	NP_036681	Edn2	-	-	2	-
NP_057267	MRTO4	NP_076025	Mrto4	XP_001071573	RGD1311709_predicted	1	1	1	2
NP_060095	ITLN1	NP_034714	Itlna	NP_001030118	---	-	-	-	6
NP_002588	PDC	NP_077778	Pdc	NP_037004	Pdc	25	-	-	-
NP_001018238	HAX1	NP_035956	Hax1	NP_853658	Hs1bp1	3	-	24	2
NP_068804	NR0B2	NP_035980	Nr0b2	NP_476474	Nr0b2	1	-	18	5
NP_060751	ECHDC2	NP_081004	Echdc2	XP_001059951	Echdc2_predicted	3	-	28	5
NP_001035284	AGTRAP	NP_033772	Agtrap	NP_001007655	Agtrap	4	2	-	-
NP_543144	ASB17	NP_080034	Asb17	XP_001078255	---	-	-	-	1
NP_658985	APOA1BP	NP_659146	Apoa1bp	XP_001068886	Apoa1bp_predicted	-	16	22	2
NP_057490	UFC1	NP_079664	Ufc1	NP_001003709	---	-	1	17	2
NP_000355	TNNT2	NP_035749	Tnnt2	NP_036808	Tnnt2	-	-	-	1
NP_009143	RNF2	NP_035407	Rnf2	NP_001020838	Rnf2	2	1	-	3
NP_001093578	ABL2	NP_033725	Abl2	XP_001068096	---	8	-	27	5
NP_001007554	CSDE1	NP_659150	Csde1	NP_446458	Unr	-	4	5	3
NP_060530	IARS2	NP_941055	Iars2	XP_001065536	Iars2_predicted	4	8	10	-
NP_036614	ZNF281	NP_808311	Zfp281	NP_001012030	Zfp281	1	8	26	5
NP_001909	DBT	NP_034152	Dbt	XP_001073131	Dbt	1	4	31	4
NP_003027	SKI	NP_035515	Ski	XP_001077382	RGD1565591_predicted	11	1	1	1
NP_008833	PRRX1	NP_001020741	Prrx1	NP_722543	Prrx1	-	17	-	-
NP_071332	GPR88	NP_071872	Gpr88	NP_113884	Gpr88	-	2	-	6
NP_068767	BCAN	NP_031555	Bcan	NP_001028837	Bcan	7	-	-	1
NP_000950	PTGFR	NP_032992	Ptgfr	NP_037247	Ptgfr	-	6	35	-
NP_056249	INTS7	NP_848747	Ints7	XP_001067002	RGD1308014_predicted	2	9	1	3
NP_009135	DDX20	NP_059093	Ddx20	XP_001066705	Ddx20	2	4	1	3
NP_078830	PGBD5	NP_741958	Pgbd5	XP_001054148	Pgbd5_predicted	-	-	-	-
NP_004492	HNRPU	NP_058085	Hnrpu	NP_476480	Hnrpu	25	10	30	-
NP_689909	HIPK1	NP_034562	Hipk1	XP_001064683	Hipk1_predicted	1	-	-	-
NP_112214	NUAK2	NP_083054	Nuak2	NP_001007618	Nuak2	21	14	10	5
NP_112175	SEMA6C	NP_035481	Sema6c	NP_059004	Sema6c	16	3	8	1
NP_001739	CAPN2	NP_033924	Capn2	NP_058812	Capn2	-	2	-	6
NP_002849	ABCD3	NP_033017	Abcd3	NP_036936	Abcd3	4	1	33	4
NP_067652	GPBP1L1	NP_084144	Gpbp1l1	NP_001030085	---	8	-	-	-
NP_115550	TOMM40L	NP_001032247	Tomm40l	NP_001076807	---	1	-	6	4
NP_003042	SLC16A1	NP_033222	Slc16a1	NP_036848	Slc16a1	-	-	27	4
NP_060656	C1orf112	NP_958752	BC055324	NP_001017493	---	-	-	-	4
NP_002219	JUN	NP_034721	Jun	NP_068607	Jun	17	6	1	5
NP_149093	SLC45A3	NP_666089	Slc45a3	XP_001059048	Slc45a3_predicted	-	5	-	5
NP_872386	CYB561D1	NP_001074789	Cyb561d1	XP_001071389	Cyb561d1_predicted	2	1	1	-
NP_857595	MFSD4	NP_766098	Mfsd4	XP_001059162	RGD1566090_predicted	1	-	-	-
NP_775106	LIN9	NP_001096652	Lin9	XP_001061895	---	11	11	6	10
NP_653299	ANKRD35	NP_001074608	Ankrd35	XP_001063190	RGD1305527_predicted	-	-	-	-
NP_001004128	QSCN6	NP_001020116	Qscn6	NP_445883	Qscn6	-	-	31	2
NP_060710	KIRREL	NP_570937	Kirrel1	NP_997489	Kirrel1	5	-	4	1
NP_003704	PPAP2B	NP_542122	Ppap2b	NP_620260	Ppap2b	7	-	1	4
NP_005048	RBBP5	NP_766105	Rbbp5	XP_001060117	Rbbp5_predicted	6	1	-	3
NP_002823	PTPN7	NP_796055	Ptpn7	NP_663716	Ptpn7	5	2	3	6
NP_002876	RAP1GAP	NP_001074624	Rap1gap	XP_001070178	Rap1ga1	3	9	-	5
NP_060531	PRPF38B	NP_080121	Prpf38b	NP_001019476	---	-	-	-	2
NP_036225	AK5	NP_001074746	Ak5	XP_001080050	---	1	2	-	11
NP_078801	TTC13	NP_663582	Ttc13	XP_001054055	Ttc13	3	3	17	-
NP_001017961	FAM78B	---	C030014K22Rik	XP_001063555	---	2	2	8	1
NP_002991	SDHB	NP_075863	Sdhb	XP_001071846	Sdhb_predicted	4	1	6	4
NP_003136	SSR2	NP_079724	Ssr2	XP_001070197	Ssr2_predicted	1	1	1	2
NP_060357	C1orf123	NP_083030	0610037L13Rik	NP_001029304	RGD1559786	-	1	-	-
NP_003318	TNFRSF4	NP_035789	Tnfrsf4	NP_037181	Tnfrsf4	2	2	-	9
NP_002394	MFAP2	NP_032572	Mfap2	XP_001072310	Mfap2_predicted	9	2	-	6
NP_000849	GUK1	NP_032219	Guk1	NP_001013133	Guk1	30	-	1	2
NP_009152	PMF1	NP_080204	Pmf1	XP_001060090	---	1	13	-	-
NP_005657	CFHR2	NP_056595	Cfhr1	NP_001037692	Cfhl1	1	-	-	4
NP_002829	PTPRC	NP_035340	Ptprc	NP_612516	Ptprc	5	2	3	6
NP_000920	PLA2G5	NP_035240	Pla2g5	NP_058870	Pla2g5	-	2	-	7
NP_000960	RPL5	NP_058676	Rpl5	NP_112361	Rpl5	3	1	-	3
NP_001034546	ATP6V0B	NP_291095	Atp6v0b	XP_001068154	Atp6v0b_predicted	4	-	-	2
NP_115704	EFCAB2	NP_080902	Efcab2	XP_001059936	Efcab2_predicted	1	-	-	-
NP_077002	C1orf50	NP_001012400	AU022252	XP_001069921	RGD1564804_predicted	-	1	-	-
NP_061134	---	NP_084336	9130211I03Rik	NP_068637	Jdp1	8	2	2	6
NP_640333	C1orf105	---	4930558K02Rik	NP_001014152	RGD1309106	-	14	6	1
NP_002781	PSMA5	NP_036097	Psma5	NP_058978	Psma5	3	2	-	3
NP_000291	PLA2G2A	NP_001076000	Pla2g2a	NP_113786	Pla2g2a	-	2	-	7
NP_057075	C1QA	NP_031598	C1qa	NP_001008515	C1qa	5	2	3	6
NP_001630	APCS	NP_035448	Apcs	NP_058866	Apcs	-	-	-	4
NP_002787	PSMB4	NP_032971	Psmb4	NP_113817	Psmb4	3	2	1	3
NP_005755	PDZK1IP1	NP_080294	Pdzk1ip1	NP_569085	Pdzk1ip1	2	9	-	-
NP_932342	FAM36A	NP_079787	2310005N03Rik	XP_001059804	RGD1309105_predicted	-	1	-	-
NP_057262	OAZ3	NP_058597	Oaz3	---	---	1	1	-	-
NP_940849	GOLT1A	NP_080956	Golt1a	XP_001060774	RGD1566310_predicted	-	1	-	2
NP_872387	C1orf111	NP_001034682	1700015E13Rik	XP_001076814	RGD1565283_predicted	22	-	20	1
NP_112570	MRPS15	NP_079820	Mrps15	NP_001007654	Mrps15	1	1	1	2
NP_055103	ITGB3BP	NP_080624	Itgb3bp	NP_001013231	Itgb3bp	-	-	2	10
NP_009193	PARK7	NP_065594	Park7	NP_476484	Park7	25	3	36	2
NP_116270	LSM10	NP_620046	Lsm10	XP_001056695	---	3	4	-	4
NP_060052	UBE2Q1	NP_081591	Ube2q1	XP_001074719	Ube2q_predicted	-	-	-	4
NP_060361	C1orf159	NP_663532	9430015G10Rik	NP_001014094	RGD1311517	7	4	-	-
NP_001929	DR1	NP_080382	Dr1	NP_001011914	Dr1	3	1	9	3
NP_006360	LRRC41	NP_705741	Lrrc41	NP_001009710	Lrrc41	30	-	-	5
NP_060592	DARS2	NP_766232	Dars2	NP_001029315	Dars2	4	-	25	12
NP_064510	SLAMF8	NP_083360	Slamf8	XP_001056042	Slamf8_predicted	14	2	12	1
NP_057317	PADI3	NP_035190	Padi3	NP_058926	Padi3	-	-	-	1
NP_003627	KCNAB2	NP_034728	Kcnab2	NP_059000	Kcnab2	27	2	-	1
NP_056256	OLFML2B	NP_796042	Olfml2b	XP_001072555	Olfml2b_predicted	-	-	-	1
NP_064590	OTUD7B	NP_001020784	Otud7b	---	---	-	7	12	1
NP_443094	RCSD1	NP_001033935	Rcsd1	XP_001071544	Rcsd1_predicted	5	3	3	6
NP_006487	GNAI3	NP_034436	Gnai3	NP_037238	Gnai3	2	1	26	3
NP_060648	GOLPH3L	NP_666245	Golph3l	NP_001007699	Golph3l	-	-	1	3
NP_061956	CCDC76	NP_084292	A930028L21Rik	XP_001073185	---	2	-	-	1
NP_002229	KCNH1	NP_001033696	Kcnh1	NP_113930	Kcnh1	1	-	26	-
NP_006234	PPP2R5A	NP_659129	Ppp2r5a	XP_001054507	---	-	-	-	4
NP_003677	EXO1	NP_036142	Exo1	XP_001059185	Exo1_predicted	-	2	32	10
NP_001069	VCAM1	NP_035823	Vcam1	NP_037021	Vcam1	6	2	38	6
NP_001014796	DDR2	NP_072075	Ddr2	XP_001065242	Ddr2	5	-	-	-
NP_061821	ERRFI1	NP_598514	Errfi1	NP_001014093	Errfi1	1	3	-	8
NP_997231	SLC25A34	NP_001013802	Slc25a34	NP_001013958	---	3	-	-	-
NP_079382	SPSB1	NP_083311	Spsb1	XP_001075317	Spsb1_predicted	8	2	1	5
NP_005057	SFPQ	NP_076092	Sfpq	NP_001020442	Sfpq	3	-	30	4
NP_003020	SHC1	NP_035498	Shc1	NP_445969	Shc1	1	-	-	-
NP_004974	KCNJ9	NP_032455	Kcnj9	NP_446286	Kcnj9	10	3	-	1
NP_001007240	KIAA0859	NP_659126	5630401D24Rik	XP_001070243	RGD1311526_predicted	25	-	1	3
NP_694945	ARHGEF19	NP_766108	Arhgef19	XP_001072580	Arhgef19_predicted	4	1	2	-
NP_067013	PTBP2	NP_062423	Ptbp2	NP_001005555	Ptbp2	2	1	-	-
NP_009101	TESK2	NP_666263	Tesk2	NP_596887	Tesk2	8	15	-	-
NP_000293	PLOD1	NP_035252	Plod1	NP_446279	Plod1	28	-	-	2
NP_071751	LEPRE1	NP_001035874	Lepre1	NP_446119	Lepre1	1	4	1	2
NP_055785	KIFAP3	NP_034759	Kifap3	XP_001070739	Kifap3_predicted	4	3	-	-
NP_002785	PSMB2	NP_036100	Psmb2	NP_058980	Psmb2	11	8	1	-
NP_109588	SMCP	NP_032600	Smcp	NP_113724	Smcp	14	2	-	1
NP_002951	S100A3	NP_035440	S100a3	NP_446133	S100a3	2	2	-	1
NP_848642	ZBTB8OS	NP_080246	Zbtb8os	XP_001060735	Zbtb8os_predicted	1	-	-	-
NP_001008728	HMGB4	NP_081312	Hmgb4	XP_001059471	---	-	-	-	1
NP_060441	MRPL20	NP_079846	Mrpl20	XP_001058618	---	5	3	23	2
NP_004519	MGST3	NP_079845	Mgst3	---	---	23	2	-	-
NP_573569	ATP6V1G3	NP_796371	Atp6v1g3	XP_001065881	Atp6v1g3_predicted	14	-	-	1
NP_002957	S100A10	NP_033138	S100a10	NP_112376	S100a10	12	-	5	6
NP_003116	SPRR1B	NP_033290	Sprr1a	XP_001065728	---	3	2	2	1
NP_054903	CNIH4	NP_084407	Cnih4	XP_001062581	RGD1559740_predicted	1	-	2	-
NP_291031	GUCA2A	NP_032216	Guca2a	NP_037250	Guca2a	2	-	1	-
NP_000974	RPL22	NP_033105	Rpl22	NP_112366	Rpl22	-	3	1	2
NP_776251	KRTCAP2	NP_079603	Krtcap2	XP_001072393	Krtcap2_predicted	-	1	1	2
NP_073730	PLA2G2F	NP_036175	Pla2g2f	XP_001070942	---	6	2	-	1
NP_055404	PLA2G2E	NP_036174	Pla2g2e	XP_001071062	Pla2g2e_predicted	1	-	4	1
NP_001634	APOA2	NP_038502	Apoa2	NP_037244	Apoa2	-	3	-	8
NP_060672	TMEM57	NP_079658	Tmem57	NP_001020870	---	1	-	-	-
NP_055642	ZC3H11A	NP_653113	Zc3h11a	NP_001041367	RGD1308290_predicted	-	-	37	5
NP_003558	BCAR3	NP_038895	Bcar3	XP_001074184	Bcar3_predicted	-	5	14	5
NP_689589	UBXD3	NP_848786	Ubxd3	NP_001013111	Ubxd3	-	-	-	6
NP_660155	WDR63	NP_766452	Wdr63	XP_001079375	Wdr63_predicted	10	-	4	3
NP_078805	CDC73	NP_666103	Cdc73	NP_001019940	Cdc73	2	1	9	3
NP_063944	ERO1LB	NP_080460	Ero1lb	XP_001054206	RGD1563548_predicted	2	-	-	3
NP_004275	CHD1L	NP_080815	Chd1l	XP_001060704	Chd1l_predicted	23	4	36	5
NP_001009999	AOF2	NP_598633	Aof2	XP_001069483	RGD1562975_predicted	18	3	21	5
NP_079112	ZNF672	NP_848876	Zfp672	NP_001007670	Zfp672	4	4	9	5
NP_001033796	CDC42SE1	NP_001033797	Cdc42se1	NP_001034133	---	26	2	1	5
NP_055991	FBXO28	NP_780336	Fbxo28	XP_001063044	Fbxo28_predicted	2	1	-	3
NP_001030307	RABGAP1L	NP_001033710	Rabgap1l	XP_001069323	RGD1304620_predicted	-	10	-	-
NP_006580	C1orf2	NP_001014995	1110013L07Rik	XP_001071695	RGD1306107_predicted	-	9	17	4
NP_031383	COG2	NP_084022	Cog2	XP_001053407	---	-	12	20	1
NP_950252	FAM5C	NP_705767	B830045N13Rik	NP_775144	Brinp3	-	-	-	1
NP_006490	LGALS8	NP_061374	Lgals8	NP_446314	Lgals8	3	-	10	3
NP_002014	FMOD	NP_067330	Fmod	NP_542429	Fmod	9	-	-	7
NP_006507	SLC2A1	NP_035530	Slc2a1	NP_620182	Slc2a1	3	-	33	5
NP_060156	GDAP2	NP_034399	Gdap2	NP_001013219	Gdap2	-	-	1	3
NP_001028197	EXTL2	NP_067363	Extl2	XP_001073624	Extl2	1	1	-	-
NP_004393	DFFB	NP_031885	Dffb	NP_445814	Dffb	-	-	2	6
NP_078862	OSBPL9	NP_598646	Osbpl9	XP_001061614	Osbpl9_predicted	-	1	-	3
NP_005140	TBX19	NP_114394	Tbx19	XP_001075412	Tbx19_predicted	2	-	4	1
NP_003806	ADAM15	NP_001032811	Adam15	NP_064704	Adam15	1	-	2	-
NP_000769	CYP4A11	NP_758510	Cyp4a12b	NP_113793	---	1	-	-	-
NP_056651	WARS2	NP_081738	Wars2	XP_001065089	---	2	7	-	6
NP_001021	RPS27	NP_081291	Rps27	NP_446049	Rps27	3	1	-	2
NP_001002810	PDE4DIP	NP_001034465	Pde4dip	NP_071777	Pde4dip	1	5	7	5
NP_001078956	MYSM1	NP_796213	Mysm1	XP_001058020	Mysm1_predicted	2	-	-	3
NP_055490	CROCC	NP_742120	Crocc	XP_001072349	Crocc_predicted	13	4	-	-
NP_065934	ZSWIM5	NP_001025083	Zswim5	XP_001071530	Zswim5_predicted	-	3	-	-
NP_055592	KIAA0133	NP_001025047	AK122209	XP_001053807	RGD1307980_predicted	3	-	-	3
NP_056121	USP24	XP_001473522	Usp24	XP_001064937	Usp24_predicted	-	1	-	3
NP_742068	RC3H1	NP_001020123	Rc3h1	XP_001057889	---	16	-	11	-
NP_055762	FOXJ3	NP_766287	Foxj3	XP_001074052	Foxj3_predicted	17	1	9	5
NP_001009881	ZCCHC11	NP_780681	Zcchc11	XP_001060223	Zcchc11_predicted	13	-	1	-
NP_060681	RAVER2	NP_898845	Raver2	XP_001061591	RGD1307610_predicted	-	-	-	1
NP_001007023	ODF2L	NP_079990	Odf2l	XP_001063750	---	2	-	-	5
NP_055453	PLCH2	NP_780765	Plch2	XP_001077247	RGD1304675_predicted	-	-	-	1
NP_055513	TMEM63A	NP_659043	Tmem63a	XP_001061935	Tmem63a_predicted	28	3	9	2
---	---	NP_001003914	Obscn	---	Obscn	6	-	4	1
NP_054721	IKBKE	NP_062751	Ikbke	XP_001058036	Ikbke_predicted	4	-	-	-
NP_078878	HECTD3	NP_780453	Hectd3	---	RGD1309823_predicted	4	4	1	3
NP_115825	CC2D1B	NP_796019	Cc2d1b	XP_001067280	Cc2d1b	-	-	2	-
NP_067003	GRHL3	NP_001013778	Grhl3	XP_001068377	Tfcp2l4_predicted	2	3	-	-
NP_060768	MCOLN3	NP_598921	Mcoln3	NP_001012059	Mcoln3	-	7	-	1
NP_002950	SORT1	NP_064356	Sort1	XP_001070445	Sort1	-	2	-	1
NP_003912	BCL10	NP_033870	Bcl10	NP_112618	Bcl10	2	3	-	3
NP_060537	MAP7D1	NP_659190	Mtap7d1	XP_001057635	---	9	1	-	5
NP_001095915	RGS4	NP_033088	Rgs4	NP_058910	Rgs4	5	1	-	-
NP_006754	BTG2	NP_031596	Btg2	NP_058955	Btg2	17	5	1	5
NP_006793	SF3A3	NP_083433	Sf3a3	NP_001020869	Sf3a3	-	-	1	2
NP_006463	TXNIP	NP_001009935	Txnip	NP_001008767	Txnip	-	-	40	5
NP_004971	KCND3	NP_001034436	Kcnd3	NP_113927	Kcnd3	11	-	8	1
NP_079355	ZC3H12A	NP_694799	Zc3h12a	NP_001071139	Zc3h12a_predicted	26	3	-	5
NP_037490	PADI1	NP_035189	Padi1	NP_062205	Padi1	-	12	2	1
NP_001002292	GPR177	NP_080858	Gpr177	NP_001078822	---	-	2	3	6
NP_940895	ANKRD45	XP_355251	Ankrd45	XP_001074114	Ankrd45_predicted	11	-	1	1
NP_003189	TCEB3	NP_038764	Tceb3	NP_058799	Tceb3	3	-	-	6
NP_000320	RPE65	NP_084263	Rpe65	NP_446014	Rpe65	22	-	-	1
NP_002688	POU2F1	NP_035267	Pou2f1	XP_001075635	Pou2f1	2	1	-	3
NP_005817	HNRPR	NP_083147	Hnrpr	NP_783193	Hnrpr	3	1	29	3
NP_115785	PINK1	NP_081156	Pink1	XP_001071148	Pink1_predicted	1	-	1	4
NP_003453	DNALI1	NP_780432	Dnali1	NP_001026817	Dnali1	-	2	-	5
NP_005990	TSNAX	NP_058605	Tsnax	NP_071598	Tsnax	-	-	1	-
NP_005586	NFIA	NP_035035	Nfia	NP_037120	Nfia	1	-	1	2
NP_001020280	CD34	NP_598415	Cd34	XP_001070343	Cd34_predicted	9	2	-	7
NP_001035214	PQLC2	NP_663359	Pqlc2	XP_001071592	Pqlc2_predicted	-	-	1	4
NP_006662	SLC1A7	NP_666367	Slc1a7	XP_001066839	Slc1a7_predicted	5	2	1	7
NP_004790	ZFYVE9	NP_899123	Zfyve9	XP_001060706	Zfyve9_predicted	-	2	-	-
NP_006358	CAP1	NP_031624	Cap1	NP_071778	Cap1	3	-	3	5
NP_004111	GBP2	NP_034389	Gbp1	NP_598308	Gbp2	12	-	3	6
NP_859066	CRTC2	NP_083157	Crtc2	NP_001029067	Crtc2	9	-	-	2
NP_055589	KIAA0494	NP_766286	4732418C07Rik	XP_001064076	RGD1310351_predicted	-	3	11	3
XP_001133123	---	NP_080576	4930549C01Rik	XP_001069522	RGD1311870_predicted	-	11	-	1
NP_001010922	C1orf178	---	Gm566	XP_001065351	RGD1562344_predicted	-	3	-	1
NP_115646	LRRC8C	NP_598658	Lrrc8c	NP_001032256	Lrrc8c	5	6	3	6
NP_073570	SMAP1L	NP_598477	Smap1l	XP_001053545	Smap1l	-	10	-	-
NP_005257	GJA5	NP_032147	Gja5	NP_062153	Gja5	31	-	8	1
NP_066566	DAB1	NP_034144	Dab1	NP_705885	Dab1	-	2	10	1
NP_955383	C1orf32	---	---	XP_001063122	---	-	-	-	-
NP_060204	PALMD	NP_075734	Palmd	NP_001020859	Palmd	8	-	33	5
NP_004418	PHC2	NP_061244	Phc2	XP_001059705	Phc2	2	1	-	5
NP_001007099	SCP2	NP_035457	Scp2	NP_612517	Scp2	1	3	-	8
NP_073745	VWA1	NP_680085	Vwa1	NP_001013960	Vwa1	1	-	10	7
NP_004687	SLC16A4	NP_666248	Slc16a4	NP_001013935	Slc16a4	1	-	-	-
NP_000428	PAFAH2	NP_598641	Pafah2	NP_808793	Pafah2	-	-	39	1
NP_258428	MMEL1	NP_038811	Mmel1	XP_001077229	Mell1_predicted	-	-	1	-
NP_060607	PRMT6	NP_849222	Prmt6	XP_001072496	Prmt6_predicted	-	-	1	3
NP_060673	KLHDC8A	NP_659059	Klhdc8a	XP_001059291	Klhdc8a	10	-	14	4
NP_006305	CNKSR1	NP_001074516	Cnksr1	NP_001034100	Cnksr1	9	2	-	7
NP_001034678	DPH2	NP_080620	Dph2	NP_001015007	Dph2	1	-	-	-
NP_078798	FAM77C	NP_080274	2610200G18Rik	XP_001062503	RGD1561205_predicted	32	-	-	1
NP_653223	DCST2	XP_283860	Dcst2	XP_001074559	Dcst2_predicted	-	12	4	1
NP_060722	C1orf75	NP_080140	2310028N02Rik	NP_001007680	RGD1359339	-	2	-	6
NP_078976	SNIP1	NP_780455	Snip1	NP_001014091	Snip1	6	1	29	5
NP_003759	PEA15	NP_035193	Pea15a	NP_001013249	Pea15	8	2	-	2
NP_002624	PGM1	NP_082408	Pgm2	NP_058729	Pgm1	1	-	28	4
NP_060536	ATPBD1B	NP_598645	Atpbd1b	XP_001066907	Atpbd1b_predicted	1	1	1	2
NP_065172	CAMK1G	NP_659066	Camk1g	NP_878262	Camk1g	6	2	2	1
NP_061183	SLC30A10	NP_001028458	Slc30a10	XP_001065717	Slc30a10_predicted	1	-	-	4
NP_114142	GPR61	NP_780679	Gpr61	XP_001071310	Gpr61_predicted	6	2	-	-
NP_653170	SPOCD1	XP_892005	---	XP_001061973	RGD1560989_predicted	-	1	-	1
NP_003920	RAB7L1	NP_659124	Rab7l1	NP_598274	Rab7l1	-	4	1	-
NP_031374	ATF6	NP_001074773	Atf6	XP_001076843	Atf6_predicted	-	4	30	13
NP_006601	MASP2	NP_001003893	Masp2	NP_742040	Masp2	12	1	-	-
NP_078820	C1orf166	NP_080965	0610009K11Rik	XP_001071218	RGD1309944_predicted	19	-	15	5
NP_057466	CD244	NP_061199	Cd244	XP_001054449	---	5	2	3	6
NP_001007215	CACYBP	NP_033916	Cacybp	NP_001004208	Cacybp	-	1	-	3
NP_056972	HOOK1	NP_084290	Hook1	XP_001054663	Hook1_predicted	2	1	1	3
NP_000289	PKLR	NP_001093249	Pklr	NP_036756	Pklr	6	2	18	-
NP_060678	ETNK2	NP_780652	Etnk2	XP_001060940	Etnk2_predicted	1	1	18	4
NP_055252	SLC39A1	NP_038929	Slc39a1	XP_001075087	Slc39a1_predicted	1	12	-	1
NP_796376	SYT2	NP_033333	Syt2	NP_036797	Syt2	-	-	-	1
NP_002370	MATN1	NP_034899	Matn1	NP_001006980	---	-	2	-	1
NP_064601	RNPEP	NP_663392	Rnpep	NP_112359	Rnpep	1	4	-	5
NP_077007	WDR77	NP_081708	Wdr77	NP_001008771	Wdr77	-	1	1	3
NP_001034702	IAH1	NP_080623	Iah1	XP_001071149	Harpb64	-	2	1	-
NP_055610	ZEB2	NP_056568	Zeb2	NP_001028873	Zfhx1b	6	2	-	6
NP_000201	ITGA6	NP_032423	Itga6	XP_001059353	Itga6	-	2	-	-
NP_061936	EML4	NP_955760	Eml4	XP_001061307	Eml4_predicted	-	-	-	5
NP_000081	COL3A1	NP_034060	Col3a1	NP_114474	Col3a1	5	-	17	7
NP_003039	SLC9A2	NP_001028461	Slc9a2	NP_036785	Slc9a2	-	7	-	1
NP_002149	FOXN2	NP_851305	Foxn2	---	---	4	3	29	1
NP_002245	KIF3C	NP_032471	Kif3c	NP_445938	Kif3c	-	-	-	12
NP_056240	POLR1A	NP_033114	Rpo1-4	NP_113960	Rpo1-4	1	-	1	2
NP_663731	LPIN1	NP_056578	Lpin1	NP_001012111	Lpin1	-	4	6	5
NP_056477	IFT172	NP_080574	Ift172	NP_446244	---	3	-	-	1
---	MBD5	NP_084200	Mbd5	---	---	30	-	21	-
NP_115705	ING5	NP_079730	Ing5	XP_001071414	Ing5_predicted	-	2	-	-
NP_003194	C2orf3	NP_808552	AW146020	XP_001071756	RGD1304792_predicted	1	-	11	-
NP_055336	SH3BP4	NP_598577	Sh3bp4	NP_073184	Sh3bp4	-	4	5	5
NP_000095	CYP1B1	NP_034124	Cyp1b1	NP_037072	Cyp1b1	-	2	10	-
NP_443149	GALNT13	NP_766618	Galnt13	NP_954537	Galnt13	-	3	-	1
NP_001150	AOX1	NP_033806	Aox1	NP_062236	Aox1	1	-	10	4
NP_573566	LRPPRC	NP_082509	Lrpprc	NP_001008519	Lrpprc	2	10	-	-
NP_002401	MGAT5	NP_660110	Mgat5	NP_075583	Mgat5	11	-	-	1
NP_000868	IL1R1	NP_032388	Il1r1	NP_037255	Il1r1	3	2	25	5
NP_000876	ITGA4	NP_034706	Itga4	XP_001067316	---	16	3	3	6
NP_001020948	UGCGL1	NP_942602	Ugcgl1	NP_598280	Ugcgl1	3	2	17	4
NP_005327	HDLBP	NP_598569	Hdlbp	NP_742036	Hdlbp	18	-	-	2
NP_055720	GLS	NP_001074550	Gls	NP_036701	Gls	5	2	19	7
NP_003733	ABCB11	NP_066302	Abcb11	NP_113948	Abcb11	1	-	-	-
NP_060903	JMJD1A	NP_001033784	Jmjd1a	NP_786940	Jmjd1a	6	1	26	5
NP_002601	PDK1	NP_766253	Pdk1	NP_446278	Pdk1	3	1	19	11
NP_872307	MTERFD2	NP_835152	Mterfd2	NP_001032286	Mterfd2	-	1	1	-
NP_006046	LANCL1	NP_067270	Lancl1	NP_446175	Lancl1	4	-	-	12
NP_063938	CYP26B1	NP_780684	Cyp26b1	NP_851601	Cyp26b1	-	2	-	2
NP_006217	PLCL1	---	Plcl1	NP_445908	Plcl1	5	-	-	-
NP_003029	SLC1A4	NP_061349	Slc1a4	NP_942058	Slc1a4	1	2	1	5
NP_001070664	PDE11A	NP_001074502	Pde11a	NP_543169	Pde11a	-	-	12	4
NP_054730	SOCS5	NP_062628	Socs5	XP_001058928	---	2	-	1	3
NP_000370	XDH	NP_035853	Xdh	NP_058850	Xdh	1	-	-	4
NP_078968	CLIP4	NP_084455	Clip4	NP_001013964	Rsnl2	6	2	13	9
NP_001032961	REV1	NP_062516	Rev1	XP_001057878	Rev1l_predicted	7	-	13	4
NP_001093867	RAPGEF4	NP_062662	Rapgef4	XP_001060956	Rapgef4	1	1	-	-
NP_079119	CYBRD1	NP_082869	Cybrd1	NP_001011954	Cybrd1	27	-	34	7
NP_057381	PCYOX1	NP_080099	Pcyox1	NP_659553	Pcyox1	2	2	38	10
NP_067675	TRIB2	NP_653134	Trib2	XP_001068999	---	7	-	-	7
NP_061854	DNAJC10	NP_077143	Dnajc10	XP_001063159	Dnajc10	3	-	-	3
NP_065196	SMEK2	NP_598795	Smek2	XP_001053322	RGD1309450_predicted	4	1	-	3
NP_653180	SFXN5	NP_848754	Sfxn5	NP_695210	Sfxn5	3	1	9	4
NP_644808	MCFD2	NP_647456	Mcfd2	NP_640346	Mcfd2	3	-	25	2
NP_003863	NRP2	NP_001070871	Nrp2	NP_110496	Nrp2	7	-	-	-
NP_078821	SAP130	NP_766553	Sap130	XP_001059195	Sap130_predicted	-	1	1	-
NP_005244	FOSL2	NP_032063	Fosl2	NP_037086	Fosl2	26	3	-	5
NP_005624	SOS1	NP_033257	Sos1	XP_001062567	Sos1	-	10	1	-
NP_006440	CDC42EP3	NP_080790	Cdc42ep3	XP_001063467	Cdc42ep3_predicted	-	2	1	4
NP_060484	BCL11A	NP_057916	Bcl11a	XP_001057685	Bcl11a	-	-	-	-
NP_002821	PTPN4	NP_064317	Ptpn4	XP_001053943	Ptpn4	-	14	-	1
NP_005957	NAB1	NP_032693	Nab1	NP_074047	Nab1	1	1	-	-
NP_001926	DPP4	NP_034204	Dpp4	NP_036921	Dpp4	1	8	1	4
NP_001005476	PKP4	NP_080637	Pkp4	XP_001058290	Pkp4_predicted	6	15	-	-
NP_001020279	AFF3	XP_001477343	Aff3	XP_001058147	Aff3_predicted	1	-	-	1
NP_579875	KCNG3	NP_705732	Kcng3	NP_001029129	Kcng3	14	-	-	-
NP_078900	SMC6	NP_079971	Smc6	XP_001068591	Smc6l1_predicted	7	1	1	4
NP_620154	MBOAT2	NP_001076810	Mboat2	XP_001074910	Oact2	17	-	-	1
NP_775816	C2orf13	NP_077213	2010301N04Rik	XP_001075022	RGD1565557_predicted	1	11	-	10
NP_006764	DDX18	NP_080136	Ddx18	NP_001006997	Ddx18	2	-	1	3
NP_115912	OSBPL6	NP_663500	Osbpl6	XP_001053299	---	-	-	-	-
NP_004792	NRXN1	NP_064648	Nrxn1	NP_068535	Nrxn1	-	-	-	9
NP_940983	ZC3H6	NP_848491	Zc3h6	XP_001081128	Zc3h6_predicted	1	-	6	2
NP_060549	SRBD1	XP_001479732	Srbd1	XP_001059624	RGD1562788_predicted	2	-	26	-
NP_004726	LRRFIP1	NP_032541	Lrrfip1	NP_001014291	Lrrfip1	13	6	-	5
NP_002837	PTPRN	NP_033011	Ptprn	NP_446333	Ptprn	-	7	1	1
NP_443134	STK11IP	NP_082162	Stk11ip	XP_001058404	Stk11ip_predicted	7	14	-	1
NP_001030598	GTF3C2	NP_082177	Gtf3c2	NP_001020291	---	30	-	-	-
NP_072046	DNMT3A	NP_031898	Dnmt3a	NP_001003957	---	1	-	-	-
NP_005261	GLI2	NP_001074594	Gli2	XP_001053566	Gli2_predicted	14	-	-	-
NP_055367	GRHL1	NP_665897	Grhl1	XP_001074769	---	-	-	-	-
NP_057215	RAB10	NP_057885	Rab10	NP_059055	Rab10	2	-	25	3
NP_005658	RNF103	NP_033569	Rnf103	NP_445890	Rnf103	-	1	19	-
NP_006177	NR4A2	NP_038641	Nr4a2	NP_062201	Nr4a2	-	-	-	5
NP_055400	SLC40A1	NP_058613	Slc40a1	NP_579849	Slc40a1	4	1	-	-
NP_060093	CNNM3	NP_001034640	Cnnm3	XP_001056677	Cnnm3_predicted	3	-	39	1
NP_071451	IFIH1	NP_082111	Ifih1	XP_001055482	RGD1560496_predicted	-	-	1	-
NP_004613	TSN	NP_035780	Tsn	NP_068530	Tsn	2	-	30	3
NP_004997	NDUFS1	NP_663493	Ndufs1	NP_001005550	Ndufs1	19	1	-	4
NP_653183	TEX261	NP_033383	Tex261	NP_001017537	Tex261	24	1	-	-
NP_060221	SMPD4	NP_084221	Smpd4	XP_001058720	RGD1310674	4	-	-	-
NP_067032	NLRC4	NP_001028539	Nlrc4	XP_001065561	Card12_predicted	5	2	3	6
NP_006600	MAP3K2	NP_036076	Map3k2	XP_001059840	Map3k2	4	-	11	-
NP_005751	CEBPZ	NP_001019977	Cebpz	XP_001059054	Cebpz_predicted	3	10	7	2
NP_079170	NOL10	NP_001008421	Nol10	NP_001014098	Nol10	3	-	1	3
NP_060444	ATG16L1	NP_084122	Atg16l1	XP_001067061	Atg16l1_predicted	-	11	1	2
NP_066964	XRCC5	NP_033559	Xrcc5	NP_803154	Xrcc5	1	-	1	4
NP_005406	SLC20A1	NP_056562	Slc20a1	NP_112410	Slc20a1	26	6	10	5
NP_000673	ADRA2B	NP_033763	Adra2b	NP_612514	Adra2b	16	3	8	1
NP_037365	STK39	NP_058562	Stk39	NP_062235	Stk39	5	2	-	6
NP_057399	GULP1	NP_081782	Gulp1	NP_001013189	Gulp1	-	-	1	-
NP_001008491	2009-09-02	NP_035021	2009-09-02	NP_476489	2009-09-02	-	-	1	3
NP_006529	BCL2L11	NP_033884	Bcl2l11	NP_072134	Bcl2l11	-	-	20	-
---	AAK1	NP_001035195	Aak1	XP_001070331	RGD1563580_predicted	-	2	25	-
NP_000429	PAX3	NP_032807	Pax3	XP_001063110	Pax3	-	-	-	-
NP_066920	SLC8A1	NP_035536	Slc8a1	NP_062141	Slc8a1	5	2	-	6
NP_002389	MEIS1	NP_034919	Meis1	XP_001054791	---	-	-	-	5
NP_079002	IQCA	XP_001474521	Iqca	XP_001066515	RGD1305311_predicted	11	-	1	-
NP_085153	KIAA1715	NP_081409	Lnp	NP_001070897	Lnp_predicted	1	-	-	-
NP_000812	GGCX	NP_062776	Ggcx	NP_113944	Ggcx	7	-	-	4
NP_001006947	SDC1	NP_035649	Sdc1	NP_037158	Sdc1	29	-	-	2
NP_062824	NGEF	NP_063920	Ngef	XP_001066859	Ngef_predicted	2	-	18	4
NP_689597	BBS5	NP_082560	Bbs5	XP_001057589	Bbs5_predicted	5	3	-	5
NP_066918	SLC5A6	NP_808538	Slc5a6	NP_570102	Slc5a6	1	-	10	4
NP_689596	DIS3L2	NP_705758	4930429A22Rik	XP_001066151	RGD1560168_predicted	-	1	4	1
NP_002047	GFPT1	NP_038556	Gfpt1	NP_001005879	Gfpt1	3	5	1	3
NP_064519	DPYSL5	NP_075534	Dpysl5	NP_075412	Dpysl5	6	-	-	3
NP_612404	MARS2	NP_780648	Mars2	XP_001066991	Mars2_predicted	3	-	-	5
NP_079520	TSGA10	NP_997111	Tsga10	XP_001057621	Tsga10	-	-	-	-
NP_000936	PPP3R1	NP_077779	Ppp3r1	NP_059005	Ppp3r1	-	1	25	2
NP_060220	RETSAT	NP_080435	Retsat	NP_659552	Retsat	1	-	-	4
NP_001034639	DNAJB2	NP_064662	Dnajb10	XP_001059709	---	9	6	33	2
NP_835224	SESTD1	NP_780674	Sestd1	XP_001066119	RGD1562244_predicted	2	2	-	-
NP_005786	CALCRL	NP_061252	Calcrl	NP_036849	Calcrl	-	1	-	1
NP_005680	ABCB6	NP_076221	Abcb6	NP_542149	Abcb6	21	1	38	2
NP_002233	KCNJ13	XP_001473790	---	NP_446060	Kcnj13	-	7	2	1
NP_004370	CREB1	NP_034082	Creb1	NP_112279	Creb1	6	-	2	3
NP_001096	ACVR1	NP_031420	Acvr1	NP_077812	Acvr1	2	-	2	3
NP_112177	LBH	NP_084275	Lbh	XP_001066790	---	9	1	3	6
NP_000566	IL1A	NP_034684	Il1a	NP_058715	Il1a	14	1	5	1
NP_000173	HADHA	NP_849209	Hadha	NP_570839	Hadha	1	-	-	4
NP_078898	FASTKD1	NP_796218	Fastkd1	XP_230003	RGD1563531_predicted	-	-	9	4
NP_055744	FASTKD2	NP_766010	Fastkd2	NP_001009673	RGD1307883	3	4	1	3
NP_001077059	---	NP_653108	1110039B18Rik	NP_001014217	RGD1311324	1	1	22	4
NP_002509	NPAS2	NP_032745	Npas2	XP_001058630	Npas2_predicted	3	-	14	4
NP_001548	IL8RB	NP_034039	Il8rb	NP_058879	Il8rb	-	-	4	-
NP_068744	C2orf43	NP_765989	1110057K04Rik	NP_001014097	RGD1311648	-	2	-	-
NP_006293	---	NP_065644	Gcs1	NP_113937	Gcs1	1	4	1	-
NP_004817	ECEL1	NP_067281	Ecel1	NP_068544	Ecel1	27	2	-	-
NP_114148	CDCA7	NP_080142	Cdca7	NP_001020864	Cdca7	17	-	-	-
NP_542388	RSAD2	NP_067359	Rsad2	NP_620236	---	-	-	-	6
NP_037457	ATG4B	NP_777363	Atg4b	NP_001020882	Atg4b	13	17	-	10
NP_001047	SULT1C2	NP_081211	Sult1c2	NP_598231	Sult1c2	-	16	1	9
NP_057706	MRPL35	NP_079706	Mrpl35	XP_001063053	Mrpl35_predicted	-	-	1	-
NP_055184	PTPN18	NP_035336	Ptpn18	NP_001013129	Ptpn18	2	2	3	6
NP_954974	---	NP_796061	4632412N22Rik	XP_001067322	RGD1310677_predicted	-	-	-	-
NP_002172	IHH	NP_034674	Ihh	XP_001060415	Ihh	-	-	1	3
NP_612199	ACMSD	NP_001028213	Acmsd	NP_599199	Acmsd	12	3	-	2
NP_002703	PPP1R7	NP_075689	Ppp1r7	NP_001009825	Ppp1r7	25	-	-	2
NP_001606	ACTG2	NP_033740	Actg2	NP_037025	Actg2	-	-	5	4
NP_620157	ZFAND2B	NP_081122	Zfand2b	NP_001020916	Zfand2b	20	3	-	2
NP_005908	MDH1	NP_032644	Mdh1	NP_150238	Mdh1	-	1	6	4
NP_001006636	MTX2	NP_058084	Mtx2	NP_001008287	Mtx2	2	1	-	3
NP_005796	PSMD14	NP_067501	Psmd14	XP_001054967	---	3	1	1	3
NP_036337	HAAO	NP_079601	Haao	NP_064461	Haao	1	-	-	4
NP_054890	CRIPT	NP_064320	Cript	NP_063972	Cript	-	1	-	3
NP_003840	SUCLG1	NP_063932	Suclg1	NP_446204	Suclg1	1	3	1	8
NP_001738	CAPG	NP_001035999	Capg	NP_001013104	Capg	14	2	3	6
NP_689599	SGPP2	NP_001004173	Sgpp2	XP_001063326	RGD1565739_predicted	-	3	-	-
NP_071411	RBKS	NP_694876	Rbks	XP_001062109	Rbks_predicted	13	-	28	-
NP_115861	PPIL3	NP_081627	Ppil3	NP_783638	Ppil3	-	-	1	-
NP_542402	KCNE4	NP_067317	Kcne4	NP_997691	Kcne4	26	6	-	5
NP_001734	CALM2	NP_031615	Calm2	NP_059022	Calm2	-	1	-	-
NP_002592	PDE6D	NP_032827	Pde6d	XP_001066038	Pde6d_predicted	-	15	-	-
NP_477513	MOGAT1	NP_080989	Mogat1	XP_001059515	Mogat1_predicted	3	2	-	-
NP_001073593	CASP8	NP_001073595	Casp8	NP_071613	Casp8	6	-	31	-
NP_000930	POMC	NP_032921	Pomc1	NP_647542	Pomc	-	8	-	-
NP_061917	CCDC93	NP_001020327	Ccdc93	NP_001020168	---	7	1	1	4
NP_001094288	PID1	NP_001003948	5033414K04Rik	XP_001062621	RGD1560766_predicted	13	1	-	3
NP_115945	IL1F10	NP_694717	Il1f10	XP_001077097	Il1f10_predicted	11	3	-	1
NP_002571	REG3A	NP_035166	Pap	NP_775120	Reg3g	2	1	2	-
NP_002428	MPV17	NP_032648	Mpv17	NP_001091710	---	1	3	-	-
NP_002655	PLEK	NP_062422	Plek	NP_001020921	Plek	5	2	3	6
NP_009330	STAT1	NP_033309	Stat1	NP_001029336	Stat1	8	-	-	6
NP_061144	ACCN4	NP_898843	Accn4	NP_071570	Accn4	2	-	-	1
NP_071881	ABCG5	NP_114090	Abcg5	NP_446206	Abcg5	1	-	28	-
NP_001002755	NFU1	NP_064429	Nfu1	XP_001070447	Hirip5_predicted	2	-	1	3
NP_003951	NAT8	XP_485799	EG434057	NP_067700	Cml2	-	2	4	-
NP_005712	ACTR3	NP_076224	Actr3	NP_112330	Actr3	-	1	-	3
NP_777559	FBXO36	NP_079662	Fbxo36	XP_001062792	Fbxo36_predicted	-	-	-	1
NP_004107	FKBP1B	NP_058559	Fkbp1b	NP_073166	Fkbp1b	-	2	-	9
NP_004783	PPIG	NP_001074555	Ppig	NP_113981	Ppig	13	4	-	3
NP_001093639	IMMT	NP_083949	Immt	NP_001030100	Immt	2	4	1	3
NP_116062	PCGF1	NP_932109	Pcgf1	NP_001007001	Pcgf1	4	4	-	-
NP_524144	MYL1	NP_067260	Myl1	NP_001071124	Myl1	1	-	-	-
NP_009058	VIL1	NP_033535	Vil1	XP_001057825	Vil1_predicted	-	-	-	-
NP_653176	CAPN13	NP_001028616	Capn13	NP_001020304	---	30	2	6	11
NP_071882	ABCG8	NP_080456	Abcg8	NP_569098	Abcg8	1	-	24	-
NP_077269	C2orf17	NP_739561	BC038286	XP_001057799	RGD1306844	28	-	-	2
NP_036224	ICOS	NP_059508	Icos	NP_072132	Icos	5	2	3	6
NP_660158	FAM84A	NP_083283	AW125753	XP_001073672	RGD1305779_predicted	-	3	-	1
NP_057217	INSIG2	NP_598509	Insig2	NP_835192	Insig2	-	-	-	1
NP_003459	FZD5	NP_001036124	Fzd5	NP_776210	Fzd5	-	2	1	-
NP_005425	MALL	NP_663507	Mall	NP_001014204	Mall	-	-	-	1
NP_115519	ZRANB3	NP_081954	Zranb3	---	---	2	18	-	-
NP_001034782	---	NP_001032831	1110034B05Rik	XP_001067847	RGD1311269_predicted	-	-	1	-
NP_008818	ZFP36L2	NP_001001806	Zfp36l2	NP_001031703	Zfp36l2	7	2	-	-
NP_000456	BARD1	NP_031551	Bard1	NP_072144	Bard1	-	2	2	10
NP_001622	ALPI	NP_001074551	Alpi	NP_073171	---	-	2	-	1
NP_005372	NCL	NP_035010	Ncl	NP_072143	Norp	3	1	1	3
NP_004152	RAB1A	NP_033022	Rab1	NP_112352	Rab1	2	1	1	3
NP_001072994	IKZF2	NP_035900	Ikzf2	XP_001054364	Zfpn1a2_predicted	1	-	-	1
NP_002900	REG1A	NP_033068	Reg1	NP_036773	Reg1	-	-	-	-
NP_005846	RAMP1	NP_058590	Ramp1	NP_113833	Ramp1	-	-	-	-
NP_004582	CCL20	NP_058656	Ccl20	NP_062106	Ccl20	8	-	-	5
NP_054900	---	NP_776113	1110067D22Rik	XP_001060304	---	25	-	27	4
NP_115787	C2orf40	NP_077245	1500015O10Rik	XP_001060972	RGD1305645_predicted	-	3	-	-
NP_079305	FAM128B	NP_083630	2410018G20Rik	XP_001065475	RGD1308126_predicted	4	6	-	-
NP_057142	TPRKB	NP_789812	Tprkb	NP_001013948	Tprkb	3	2	-	-
NP_063949	POLE4	NP_080158	Pole4	XP_001071977	Pole4_predicted	3	1	-	3
NP_079051	GEMIN6	NP_080329	Gemin6	NP_001009466	Gemin6	17	5	-	-
---	MORN2	NP_919245	Morn2	XP_001062730	RGD1563988_predicted	-	2	7	2
NP_003752	VAMP8	NP_058074	Vamp8	NP_114015	Vamp8	13	-	-	5
NP_004171	TANK	NP_035659	Tank	NP_665731	Tank	2	1	25	3
NP_036381	RHOQ	NP_663466	Rhoq	NP_445974	Rhoq	1	3	-	9
NP_660213	MRPL30	NP_081374	Mrpl30	XP_001057859	Mrpl30_predicted	3	1	23	3
NP_008822	CRYGD	NP_031802	Crygd	NP_149086	Crygd	-	3	-	-
NP_057578	---	NP_079883	2500002L14Rik	NP_001007648	---	1	4	-	4
NP_899063	TMEM37	NP_062305	Tmem37	NP_620795	Tmem37	29	-	35	4
NP_002945	RPS27A	NP_001029037	Rps27a	NP_112375	Rps27a	3	3	-	2
NP_002148	HSPE1	NP_032329	Hspe1	NP_037098	Hspe1	3	3	1	2
NP_001035869	ANKZF1	NP_080463	D1Ertd161e	NP_001014241	RGD1359242	2	1	-	3
NP_653312	KLHL23	NP_808452	Klhl23	XP_001059088	Klhl23_predicted	-	-	2	1
NP_001434	FABP1	NP_059095	Fabp1	NP_036688	Fabp1	1	3	-	8
NP_005782	MPHOSPH10	NP_080759	Mphosph10	XP_001058593	Mphosph10_predicted	3	1	9	3
NP_775806	CLEC4F	NP_058031	Clec4f	NP_446205	Clec4f	6	-	3	6
NP_066926	TMSB10	NP_001034481	Tmsb10	NP_067084	Tmsb10	12	2	5	6
NP_003275	TNP1	NP_033433	Tnp1	NP_058752	Tnp1	-	3	-	1
NP_077720	NPPC	NP_035063	Nppc	NP_446202	Nppc	14	14	-	1
NP_006054	KBTBD10	NP_001074556	Kbtbd10	NP_476539	Kbtbd10	-	-	-	-
NP_775918	RNF149	NP_001028307	Rnf149	XP_001058362	Rnf149	6	7	-	-
NP_061921	ASNSD1	NP_598489	Asnsd1	XP_001060870	RGD1306332_predicted	2	4	1	3
NP_005369	MYCN	NP_032735	Mycn	NP_001013114	---	-	-	-	1
NP_000339	SRD5A2	NP_444418	Srd5a2	NP_073202	Srd5a2	1	2	-	1
NP_060434	SLC30A6	NP_659047	Slc30a6	XP_001065683	Slc30a6_predicted	-	-	-	-
NP_116216	ATOH8	NP_722473	Atoh8	XP_001063489	RGD1561512_predicted	-	-	28	4
NP_001073896	THSD7B	NP_766073	Thsd7b	XP_222597	RGD1306938_predicted	-	1	35	-
NP_001006637	GTDC1	NP_766250	Gtdc1	NP_001019445	---	6	4	-	-
NP_115652	RHBDD1	NP_084053	Rhbdd1	NP_001020062	RGD1306477	3	3	-	1
NP_056126	OBSL1	NP_849215	AW822216	XP_001062053	RGD1306073_predicted	3	2	-	-
NP_065795	MTA3	NP_473423	Mta3	XP_001061120	Mta3_predicted	-	-	1	-
NP_001599	ACADL	NP_031407	Acadl	NP_036951	Acadl	1	-	-	4
NP_065075	SLC39A10	NP_766241	Slc39a10	XP_001061829	---	-	2	6	-
NP_002888	RBMS1	NP_064692	Rbms1	NP_001012184	Rbms1	1	1	-	-
NP_006155	NFE2L2	NP_035032	Nfe2l2	NP_113977	Nfe2l2	7	2	10	5
NP_057594	SCLY	NP_057926	Scly	NP_001007756	Scly	8	-	10	4
NP_000136	FSHR	NP_038551	Fshr	NP_954707	Fshr	-	1	-	-
NP_003457	PAX8	NP_035170	Pax8	NP_112403	Pax8	2	3	-	1
NP_071905	HS1BP3	NP_067404	Hs1bp3	XP_001071788	RGD1311331_predicted	-	3	-	2
NP_004534	NEB	NP_035019	Neb	XP_001056398	Neb_predicted	-	-	-	-
NP_004031	RHOB	NP_031509	Rhob	NP_071987	Rhob	-	-	1	-
NP_003460	SCG2	NP_033155	Scg2	NP_073160	Scg2	22	-	24	1
NP_055935	ALMS1	NP_660258	Alms1	XP_001074073	Alms1_predicted	-	1	7	3
NP_001035932	MLPH	NP_443748	Mlph	NP_001012135	Mlph	-	-	13	9
NP_061720	DNAH7	---	Dnahc7c	XP_001065965	Dnah7	2	-	-	1
NP_004481	GRB14	NP_057928	Grb14	NP_113811	Grb14	1	3	-	-
NP_001035902	ST3GAL5	NP_001030305	St3gal5	NP_112627	St3gal5	-	5	1	-
NP_940863	LONRF2	NP_001025049	Lonrf2	XP_001058206	Lonrf2_predicted	-	2	2	1
NP_001607	ACVR2A	NP_031422	Acvr2a	NP_113759	Acvr2a	-	-	1	-
NP_055524	USP34	XP_001476700	Usp34	---	---	13	2	-	1
NP_004312	KIF1A	NP_032466	Kif1a	---	---	6	-	4	1
NP_071320	TIA1	NP_035715	Tia1	NP_001012096	Tia1	2	12	-	-
NP_848526	GMCL1	NP_035948	Gmcl1	NP_001010956	Gmcl1	4	-	-	4
NP_002017	FN1	NP_034363	Fn1	NP_062016	Fn1	1	3	-	8
NP_002243	KCNS3	NP_775593	Kcns3	NP_113966	Kcns3	-	13	-	7
NP_065986	USP37	NP_795946	Usp37	---	---	2	-	-	-
NP_002899	REL	NP_033070	Rel	XP_001062884	Rel_predicted	1	6	21	5
NP_000083	COL4A4	NP_031761	Col4a4	NP_001008333	Col4a4	5	-	24	1
NP_005887	IDH1	NP_034627	Idh1	NP_113698	Idh1	1	1	-	4
NP_003119	SPTBN1	NP_033286	Spnb2	NP_001013148	Spnb2	8	1	-	5
NP_056993	---	---	4933425L03Rik	---	---	2	-	1	9
NP_072174	TNS1	XP_619639	Tns1	XP_001055943	Tns	13	4	18	4
NP_005733	PDIA6	NP_082235	Pdia6	NP_001004442	Pdia6	3	16	-	2
NP_065702	PELI1	NP_075813	Peli1	XP_001055954	Peli1	3	1	-	3
NP_001340	DARS	NP_663482	Dars	NP_446251	Dars	3	1	1	3
NP_004825	MAP4K4	NP_032722	Map4k4	XP_001058422	Map4k4_predicted	15	2	-	1
NP_004332	CAD	NP_076014	Cad	XP_001063872	---	1	4	-	2
NP_002340	LY75	NP_038853	Ly75	XP_001068965	RGD1565962_predicted	5	3	-	6
NP_003485	DYSF	NP_001071162	Dysf	XP_001069038	Dysf_predicted	1	2	31	6
NP_065960	EPB41L5	NP_663481	Epb4.1l5	NP_001012023	Epb4.1l5	1	1	-	4
NP_055855	PIP5K3	NP_035216	Pip5k3	XP_001072465	---	2	-	1	-
NP_001014972	ZNF638	NP_032743	Zfml	XP_001073303	Zfml_predicted	-	1	-	3
NP_055864	TRAK2	NP_765994	Trak2	NP_598244	Trak2	-	1	-	2
NP_002968	SCN9A	NP_061340	Scn9a	NP_579823	Scn9a	-	-	-	6
NP_004429	EPHA4	NP_031962	Epha4	XP_244186	RGD1560587_predicted	-	2	14	2
NP_001035232	SCN2A	NP_001092768	Scn2a1	NP_036779	---	25	-	-	1
NP_000590	IGFBP5	NP_034648	Igfbp5	NP_036949	Igfbp5	-	-	1	9
NP_073728	PER2	NP_035196	Per2	NP_113866	Per2	17	-	14	4
NP_000618	LTBP1	NP_064303	Ltbp1	NP_067598	Ltbp1	1	2	17	7
NP_056132	PUM2	NP_109648	Pum2	XP_001068003	Pum2	-	-	-	3
NP_001077422	THADA	XP_619495	Thada	XP_001060686	RGD1560519_predicted	1	2	-	2
NP_061887	POLR1B	NP_033112	Rpo1-2	NP_113961	Rpo1-2	1	-	1	2
NP_005535	IRS1	NP_034700	Irs1	NP_037101	Irs1	1	18	-	4
NP_005804	PRKD3	NP_083515	Prkcn	XP_001054495	Prkcn	2	-	-	-
NP_001866	CPS1	NP_001074278	Cps1	NP_058768	Cps1	1	3	6	8
NP_076985	TRPM8	NP_599013	Trpm8	NP_599198	Trpm8	-	12	1	-
NP_057525	CRIM1	NP_056615	Crim1	XP_001064272	Crim1_predicted	5	2	1	7
NP_065915	---	NP_766437	9430031J16Rik	XP_001063925	RGD1305560_predicted	11	-	-	1
NP_036425	PXDN	NP_852060	Pxdn	XP_001053103	---	5	-	1	6
---	WDR43	XP_001005092	Wdr43	XP_001059356	---	3	4	1	3
NP_065191	TTC7A	NP_082915	Ttc7	XP_001058396	Ttc7	32	-	25	4
NP_001007232	ARHGAP25	NP_001032816	Arhgap25	XP_001070699	RGD1562105_predicted	5	7	3	6
NP_115895	KIAA1841	NP_082136	0610010F05Rik	NP_001094441	RGD1305110_predicted	-	1	1	-
NP_061964	PLEKHA3	NP_112546	Plekha3	NP_001013095	Plekha3	2	1	-	3
NP_001003683	PDE1A	NP_001009978	Pde1a	NP_110498	Pde1a	11	4	1	-
NP_694946	---	NP_077199	1600015H20Rik	XP_001081124	RGD1310131_predicted	1	2	4	1
NP_000332	SLC3A1	NP_033231	Slc3a1	NP_058912	Slc3a1	1	-	6	4
NP_079071	TM4SF20	NP_079729	Tm4sf20	XP_001061801	---	10	17	-	1
NP_004296	BIN1	NP_001076803	Bin1	NP_446411	Bin1	29	-	-	5
NP_071435	TMBIM1	NP_081430	Tmbim1	NP_001007714	Tmbim1	15	1	1	-
NP_008939	RTN4	NP_077188	Rtn4	NP_114019	Rtn4	1	-	-	-
NP_001008708	CHAC2	NP_080803	Chac2	NP_001020187	RGD1309120	2	1	15	5
NP_689598	---	XP_125968	1700034F02Rik	NP_001013899	RGD1307937	-	-	12	8
NP_000858	HTR2B	NP_032337	Htr2b	NP_058946	Htr2b	-	3	-	1
NP_057199	ASB3	NP_076395	Asb3	XP_344278	Asb3_predicted	2	1	-	4
NP_001015055	RTKN	NP_033132	Rtkn	NP_908935	Rtkn	7	1	39	1
NP_057145	YPEL5	NP_081442	Ypel5	NP_001030298	Ypel5	4	3	14	4
NP_620158	---	XP_911673	BC062650	XP_001068369	RGD1561169_predicted	22	-	-	-
NP_055962	CEP68	NP_758464	Cep68	XP_001059836	Cep68_predicted	10	1	7	1
NP_055377	OTX1	NP_035153	Otx1	NP_037241	Otx1	-	-	13	1
NP_001477	GCKR	NP_659158	Gckr	NP_037252	Gckr	-	16	-	4
NP_061041	ALS2CR2	NP_766244	Als2cr2	XP_001069230	RGD1559449_predicted	1	4	-	4
NP_037520	PREB	NP_057912	Preb	---	Preb	1	3	1	2
NP_001035499	MTHFD2	NP_032664	Mthfd2	XP_001056154	---	3	2	1	5
NP_006581	USP39	NP_613058	Usp39	XP_001063779	Usp39_predicted	15	1	1	3
NP_001956	EGR4	NP_065621	Egr4	NP_062010	Egr4	-	-	-	-
NP_653232	ZNF513	NP_780520	Zfp513	NP_001012110	Zfp513	4	12	-	2
NP_008847	RPE	NP_079959	Rpe	NP_001029075	---	2	4	-	3
NP_060556	FIGN	NP_068362	Fign	XP_001055272	Fign_predicted	20	5	1	5
NP_001008410	STEAP3	NP_001078878	Steap3	NP_579848	Steap3	-	-	1	-
NP_006207	SERPINE2	NP_033281	Serpine2	XP_001060394	Serpine2	5	2	17	7
NP_055028	HOXD9	NP_038583	Hoxd9	XP_001063848	---	2	10	-	-
NP_653310	---	NP_001028826	4933435A13Rik	NP_001020449	RGD1306402	-	1	29	3
NP_006454	STAMBP	NP_077201	Stambp	NP_612540	Stambp	-	4	7	13
NP_001091669	GPR1	NP_666362	Gpr1	NP_037093	Gpr1	-	-	2	-
NP_079352	UXS1	NP_080706	Uxs1	NP_647552	Uxs1	16	2	1	1
NP_001037850	ALS2CR4	NP_001028621	Als2cr4	XP_001064402	Als2cr4_predicted	2	2	23	-
NP_997646	ARID5A	NP_666108	Arid5a	NP_001030106	Arid5a	2	-	-	5
NP_003650	AGPS	NP_766254	Agps	NP_445802	Agps	4	-	1	3
NP_002530	ODC1	NP_038642	Odc1	NP_036747	Odc1	1	1	1	3
NP_000775	CYP27A1	NP_077226	Cyp27a1	NP_849178	Cyp27a1	1	3	18	8
---	TMEM185B	NP_666215	Tmem185b	XP_001053834	RGD1309602_predicted	1	3	1	5
NP_786951	TCF23	NP_444315	Tcf23	XP_001067558	---	2	2	-	-
NP_001001394	---	NP_032325	Dnajb3	XP_001057422	---	1	-	10	1
---	---	NP_067269	Dbil5	NP_067607	Dbil5	1	-	-	1
NP_064707	CXCR7	NP_031748	Cxcr7	NP_445804	Cmkor1	8	2	5	6
NP_079058	NHEJ1	NP_083618	Nhej1	NP_001014239	---	8	1	-	-
NP_612403	HNRPLL	NP_659051	Hnrpll	XP_001063027	Hnrpll_predicted	3	1	-	3
NP_694453	---	NP_700454	---	NP_695218	Drb1	3	-	-	3
NP_085126	---	NP_766018	4930544G21Rik	XP_001062329	RGD1311951_predicted	1	3	1	1
NP_542384	ATP6V1E2	NP_083397	Atp6v1e2	XP_001055453	Atp6v1e2_predicted	-	-	-	1
NP_073567	COPS7B	NP_766562	Cops7b	XP_001064503	Cops7b_predicted	9	-	-	5
NP_064528	PNO1	NP_079719	Pno1	NP_954514	---	3	1	1	3
NP_000174	HADHB	NP_663533	Hadhb	NP_598302	Hadhb	1	1	-	4
NP_001032720	CTLA4	NP_033973	Ctla4	NP_113862	Ctla4	17	3	13	9
NP_071894	RAB17	NP_033024	Rab17	XP_001066796	RGD1562478_predicted	3	11	-	5
NP_079209	ANKRD53	NP_083521	Ankrd53	---	---	11	2	2	1
NP_057018	---	NP_061356	Nol5	NP_068522	Nol5	1	4	1	3
NP_056492	SH3YL1	NP_038737	Sh3yl1	XP_001072907	Sh3yl1_predicted	-	11	-	4
NP_653313	SLC23A3	NP_919314	Slc23a3	XP_001060290	Slc23a3_predicted	1	-	-	-
NP_005404	SIX3	NP_035511	Six3	NP_076480	Six3	14	-	-	1
NP_004890	BRE	NP_653124	Bre	NP_954891	Bre	3	-	-	-
NP_620156	GALM	NP_795937	Galm	NP_001007705	Galm	1	1	1	-
NP_004796	POLR2D	NP_081278	Polr2d	XP_001059312	Polr2d_predicted	3	2	9	2
NP_004035	ATIC	NP_080471	Atic	NP_112276	Atic	1	1	1	2
NP_000212	KHK	NP_032465	Khk	NP_114061	Khk	29	-	1	4
NP_006287	VRK2	NP_081536	Vrk2	XP_001064313	Vrk2_predicted	3	-	-	13
NP_079478	EFHD1	NP_083165	Efhd1	XP_001065159	RGD1559565_predicted	-	11	-	4
---	---	XP_001478071	Dnahc6	XP_001069941	Dnah6	1	2	4	1
NP_060911	PECR	NP_076012	Pecr	NP_579833	Pecr	1	2	38	4
NP_003376	VSNL1	NP_036168	Vsnl1	NP_036818	Vsnl1	1	-	-	1
NP_001608	ADD2	NP_038486	Add2	NP_036623	Add2	-	3	-	1
NP_006761	MARCO	NP_034896	Marco	XP_001054109	---	5	-	3	6
NP_004873	---	NP_080130	1700023B02Rik	NP_001007800	RGD1309199	14	-	4	1
NP_057039	MEMO1	NP_598532	Memo1	NP_001025088	RGD1309929	25	-	1	-
NP_689741	WDSUB1	NP_082394	Wdsub1	NP_001014201	Wdsub1	-	1	-	2
XP_371503	---	XP_001478382	1700003E16Rik	NP_001019501	---	2	2	-	1
NP_001017920	---	NP_083999	2310032F03Rik	XP_001068559	RGD1309610_predicted	-	-	-	1
NP_001008779	SPDYA	XP_001480271	Spdya	NP_620210	Spdy1	10	-	-	1
NP_001001521	UGP2	NP_647458	Ugp2	NP_001019914	Ugp2	4	1	1	-
NP_116211	---	NP_079867	2010309E21Rik	XP_001074564	RGD1304825_predicted	25	1	-	3
NP_689604	PQLC3	NP_766162	Pqlc3	NP_001030124	Pqlc3	4	2	2	6
NP_004279	PSCDBP	NP_631939	Pscdbp	NP_001012086	Pscdbp	5	6	3	6
NP_001078	AAMP	NP_666222	Aamp	XP_001057423	Aamp_predicted	18	3	15	2
NP_005750	ABI2	NP_937760	Abi2	NP_775166	Abi2	5	3	-	8
NP_002140	HPCAL1	NP_057886	Hpcal1	NP_059052	Hpcal1	-	2	-	-
NP_115935	TRIM54	NP_067422	Trim54	NP_001013235	Trim54	4	-	-	1
NP_000568	IL1RN	NP_001034790	Il1rn	NP_071530	Il1rn	26	3	13	9
NP_004062	CLK1	NP_001036099	Clk1	XP_001063325	Clk1	4	1	-	5
NP_003681	PRKRA	NP_036001	Prkra	NP_001019951	Prkra	4	3	-	-
NP_055177	HIBCH	NP_666220	Hibch	NP_001013130	Hibch	1	1	-	4
NP_001034581	FHL2	NP_034342	Fhl2	NP_113865	Fhl2	21	2	-	6
NP_001063	UGT1A6	NP_958812	Ugt1a6b	NP_001034780	Ugt1a6	1	1	10	4
NP_004217	STK17B	NP_598571	Stk17b	NP_596883	Stk17b	6	8	2	6
NP_001008540	CXCR4	NP_034041	Cxcr4	NP_071541	Cxcr4	5	-	-	-
NP_002185	INPP1	NP_032410	Inpp1	NP_001012131	Inpp1	-	5	2	5
NP_001074004	---	NP_700457	---	NP_001014122	---	8	16	40	6
NP_060532	FANCL	NP_080199	Fancl	XP_001064256	Fancl_predicted	7	8	20	-
NP_001019245	HNMT	NP_536710	Hnmt	NP_112306	Hnmt	1	1	-	1
NP_003301	TSSC1	NP_958745	Tssc1	NP_001012192	Tssc1	19	9	22	2
NP_056278	C2orf32	NP_084137	1500041B16Rik	NP_001014254	RGD1308373	5	2	34	6
NP_112185	TMEM163	NP_082411	Tmem163	XP_001057323	RGD1306212_predicted	1	-	-	5
NP_114108	MRPS5	NP_084239	Mrps5	XP_001078600	Mrps5_predicted	3	1	29	2
NP_004088	EMX1	NP_034261	Emx1	XP_001073769	RGD1564002_predicted	2	3	2	1
NP_002927	RNASEH1	NP_035405	Rnaseh1	NP_001013115	Rnaseh1	1	4	-	-
NP_001028170	KYNU	NP_081828	Kynu	NP_446354	Kynu	7	1	-	4
NP_060739	ADI1	NP_598813	Adi1	NP_954528	Adi1	1	-	1	-
NP_689603	TMEM178	NP_080792	Tmem178	NP_001004282	---	3	2	-	-
NP_775783	---	NP_796048	9330158F14Rik	XP_001055605	RGD1306005_predicted	1	3	-	-
NP_997198	---	NP_065582	Tyki	XP_001075137	Tyki_predicted	-	-	5	6
NP_115883	ZC3H8	NP_065619	Zc3h8	NP_001012090	Zc3h8	-	-	-	5
NP_057254	TLX2	NP_033418	Tlx2	XP_001054552	---	2	8	2	1
NP_001028257	HAT1	NP_080391	Hat1	NP_001009657	Hat1	2	12	2	10
NP_001034813	NOSTRIN	NP_853525	Nostrin	NP_001019431	Nostrin	-	4	-	-
NP_057013	LIPT1	NP_001033007	EG623661	XP_001057736	Lipt1_predicted	2	6	-	5
NP_060470	MREG	NP_001005423	Mreg	XP_001056335	RGD1562333_predicted	-	3	1	4
NP_954697	---	NP_079909	Metapl1	XP_001059115	Metapl1_predicted	19	-	7	2
NP_002345	TACSTD1	NP_032558	Tacstd1	NP_612550	Tacstd1	5	2	10	7
NP_078796	C2orf47	NP_001074650	9430016H08Rik	NP_001004251	---	4	-	-	-
NP_000567	IL1B	NP_032387	Il1b	NP_113700	Il1b	21	-	3	6
NP_110424	FAM49A	NP_084034	D12Ertd553e	XP_001073211	RGD1305961_predicted	25	2	1	-
NP_001026908	TMEM150	NP_659165	Tmem150	NP_620807	Tm6p1	31	1	-	-
NP_062819	RPRM	NP_075885	Rprm	NP_001037741	---	-	-	14	4
NP_004624	IL1R2	NP_034685	Il1r2	NP_446405	Il1r2	-	2	-	5
NP_110395	ILKAP	NP_075832	Ilkap	NP_072128	Ilkap	4	10	-	-
NP_872578	MRPS9	NP_076003	Mrps9	XP_001059532	Mrps9	17	-	-	2
NP_002182	INHA	NP_034694	Inha	NP_036722	Inha	2	7	-	1
NP_055528	LAPTM4A	NP_032666	Laptm4a	NP_955416	Laptm4a	-	1	-	3
NP_001027452	TFPI	NP_035706	Tfpi	NP_058896	Tfpi	28	3	-	-
NP_004754	ITGB1BP1	NP_032429	Itgb1bp1	XP_001070826	Itgb1bp1_predicted	-	12	-	-
NP_004679	NMI	NP_062274	Nmi	NP_001029320	Nmi	2	-	-	-
NP_060906	ALLC	NP_444386	Allc	NP_001013055	Allc	-	18	-	-
NP_938017	TMEM17	NP_705824	Tmem17	NP_001010961	Tmem17	-	9	4	-
NP_085054	TMEM177	NP_780315	Tmem177	NP_001032865	RGD1310320	3	3	7	2
NP_006348	UBE2E3	NP_033480	Ube2e3	NP_001041322	Ube2e3_predicted	4	1	9	-
NP_542398	CCDC104	NP_080016	Ccdc104	NP_001020037	RGD1311732	3	8	13	9
NP_002157	ID2	NP_034626	Id2	NP_037192	Id2	-	-	-	5
NP_055578	MRPL19	NP_080766	Mrpl19	NP_001025069	---	2	10	1	2
NP_851939	FKBP7	NP_034352	Fkbp7	XP_001065788	Fkbp7_predicted	-	2	-	-
NP_001002257	LYCAT	NP_001074540	Lycat	XP_001060474	RGD1565906_predicted	4	-	-	-
NP_001008743	---	NP_061221	Sult1c1	NP_113920	Sult1c1	31	-	-	1
NP_001017927	---	NP_082715	3110009E18Rik	XP_001054392	---	2	-	-	-
NP_000297	POU1F1	NP_032875	Pou1f1	NP_037140	Pou1f1	6	-	-	1
NP_071933	ATG3	NP_080678	Atg3	NP_599221	Apg3l	3	-	-	-
NP_002036	GAP43	NP_032109	Gap43	NP_058891	Gap43	-	2	-	1
NP_008953	CYB561D2	NP_062694	Cyb561d2	NP_001007754	Cyb561d2	3	1	7	2
NP_000087	CP	NP_001036076	Cp	NP_036664	Cp	-	3	24	8
NP_003247	TIMP4	NP_542370	Timp4	XP_001053615	---	-	2	-	1
NP_061844	GPR27	NP_032184	Gpr27	NP_075587	Gpr27	1	2	1	1
NP_060855	LSG1	NP_835170	Lsg1	NP_001013439	Lsg1	4	18	2	4
NP_659433	ARL13B	NP_080853	Arl13b	XP_001055321	---	2	1	-	3
NP_000304	PROS1	NP_035303	Pros1	NP_112348	Pros1	7	1	-	-
NP_071888	MLF1	NP_001034632	Mlf1	XP_001065492	Mlf1_predicted	17	-	32	-
NP_006001	ARMET	NP_083379	Armet	XP_001072112	Armet_predicted	3	16	-	2
NP_056222	ABHD14A	NP_666031	Abhd14a	NP_001009670	Abhd14a	3	-	2	4
NP_113646	PARP9	NP_084529	Parp9	XP_001071222	Parp9_predicted	-	-	-	-
NP_037506	PDCD6IP	NP_035182	Pdcd6ip	XP_001076624	RGD1561176_predicted	3	3	1	9
NP_689885	---	NP_666044	---	XP_001072940	RGD1311100_predicted	-	2	-	-
NP_001033717	B3GALNT1	NP_064410	B3galnt1	NP_001013176	B3galt3	6	-	-	6
NP_065086	PLSCR4	NP_848826	Plscr4	NP_001012000	Plscr4	2	3	2	1
NP_006210	PIK3CB	NP_083370	Pik3cb	NP_445933	Pik3cb	2	3	-	-
NP_004935	DNASE1L3	NP_031896	Dnase1l3	NP_446359	Dnase1l3	1	-	1	6
NP_149016	AXUD1	NP_695019	Axud1	XP_001077652	Axud1_predicted	26	-	-	5
NP_060926	EAF2	NP_598872	Eaf2	NP_742044	Eaf2	3	-	-	-
NP_055819	EXOSC7	NP_001074657	Exosc7	XP_001078932	Exosc7	3	-	1	2
NP_000835	GRM7	NP_796302	Grm7	NP_112302	Grm7	14	-	-	1
NP_065691	DCUN1D1	---	Tes3-ps	XP_001067883	Dcun1d1_predicted	4	1	14	4
NP_710157	FAM43A	NP_808300	BC022623	NP_001034091	RGD1304790	2	3	-	-
NP_061121	ZNF167	XP_001474560	Zfp167	XP_001078438	Znf167_predicted	-	-	26	3
NP_667340	ALS2CL	NP_666340	Als2cl	XP_001076120	RGD1305208_predicted	6	3	26	1
NP_054889	GTPBP8	NP_079608	Gtpbp8	NP_001020186	Gtpbp8	2	-	30	3
NP_036322	ALDH1L1	NP_081682	Aldh1l1	NP_071992	Fthfd	1	-	19	4
NP_003253	TLOC1	NP_081292	Tloc1	NP_001029301	Tloc1	4	1	23	-
NP_005769	RBM5	NP_683732	Rbm5	XP_001073543	Rbm5	9	-	37	5
NP_003403	ZIC1	NP_033599	Zic1	NP_073168	Zic1	-	-	8	1
NP_009038	SSR3	NP_080431	Ssr3	NP_112382	Ssr3	-	1	1	9
NP_001090	ACPP	NP_062781	Acpp	NP_064457	Acpp	-	1	14	-
NP_116176	GPR128	NP_766413	Gpr128	XP_001059246	---	1	2	-	-
NP_115655	ATP13A4	NP_766201	Atp13a4	XP_001053714	RGD1306927_predicted	-	-	-	1
NP_808881	---	NP_848783	E430028B21Rik	NP_001014020	RGD1310975	3	1	9	3
NP_064550	RAD18	NP_067360	Rad18	NP_001071141	Rad18_predicted	2	-	1	10
NP_055965	RFTN1	NP_852062	Rftn1	XP_001062448	RGD1563347_predicted	-	17	3	6
NP_002871	RAF1	NP_084056	Raf1	NP_036771	Raf1	-	11	28	5
NP_060736	TMEM39A	NP_080683	Tmem39a	NP_001013887	Tmem39a	-	-	1	3
NP_060654	ARL8B	NP_080287	Arl8b	NP_001019503	---	2	3	35	3
NP_057537	NCKIPSD	NP_109654	Nckipsd	XP_001075337	Nckipsd_predicted	-	2	1	-
NP_057558	C3orf19	NP_766318	C130022K22Rik	NP_001009659	RGD1305225	-	10	21	2
NP_003661	BHLHB2	NP_035628	Bhlhb2	NP_445780	Bhlhb2	26	-	-	5
NP_002206	ITIH1	NP_032432	Itih1	XP_001060219	Itih1_predicted	3	3	1	8
NP_001005861	RYK	NP_001036072	Ryk	NP_536327	Ryk	2	16	-	2
NP_056268	THUMPD3	NP_032214	Thumpd3	XP_001078607	RGD1560852_predicted	3	1	1	3
NP_000149	GBE1	NP_083079	Gbe1	XP_001064453	Gbe1	4	3	-	4
NP_115719	CHCHD6	NP_079627	Chchd6	XP_001072660	Chchd6_predicted	-	2	22	4
NP_001028202	FAIM	NP_035940	Faim	NP_543171	Faim	3	15	-	13
NP_891980	MOBP	NP_001034453	Mobp	NP_036852	Mobp	16	2	8	1
NP_000165	GP9	NP_061232	Gp9	NP_001026995	---	6	1	19	-
NP_653235	LYZL4	NP_081191	Lyzl4	XP_001078029	Lyzl4_predicted	-	3	2	1
NP_000249	MYL3	NP_034989	Myl3	NP_036738	Myl3	22	-	1	1
NP_620161	CD200R1	NP_067300	Cd200r1	NP_076443	Mox2r	11	2	3	6
NP_065747	KIAA1143	NP_079695	1110059G10Rik	NP_001008330	RGD1311745	-	3	1	5
NP_006223	POLR2H	NP_663607	Polr2h	XP_001059014	RGD1561203_predicted	1	1	2	-
NP_001030168	RPL14	NP_080250	Rpl14	NP_075238	Rpl14	3	-	-	2
NP_067060	---	NP_064363	---	NP_997472	---	3	1	17	3
NP_001002026	CLDN18	NP_062789	Cldn18	NP_001014118	---	27	13	4	1
NP_054760	SPCS1	NP_081187	Spcs1	---	---	13	10	1	2
NP_002890	RBP1	NP_035384	Rbp1	NP_036865	Rbp1	-	2	1	7
NP_004155	RBP2	NP_033060	Rbp2	NP_036772	Rbp2	-	-	-	1
NP_003271	TNNC1	NP_033419	Tnnc1	NP_001029277	Tnnc1	-	7	-	1
NP_000720	CCK	NP_112438	Cck	NP_036961	Cck	-	-	-	1
NP_150284	CAMK2N2	XP_919498	Camk2n2	NP_067710	Camk2n2	6	2	-	1
NP_057446	GHRL	NP_067463	Ghrl	NP_067701	Ghrl	16	-	-	1
NP_005204	CSTA	NP_001076016	EG433016	XP_001070663	Stfa3_predicted	-	-	-	-
---	---	NP_080886	Ndufb4	NP_001032415	Ndufb4	-	1	23	2
NP_002255	KPNA1	NP_032491	Kpna1	NP_942021	Kpna1	-	1	25	2
NP_061127	MYNN	NP_085034	Mynn	NP_001012178	Mynn	4	2	-	1
NP_056327	DNAH1	XP_923748	Dnahc1	NP_001028827	Dnah1	11	-	-	-
NP_115529	ZIC4	NP_033602	Zic4	XP_001064401	Zic4_predicted	24	-	-	1
NP_808807	---	NP_083220	4933406E20Rik	XP_001075237	RGD1311848_predicted	5	-	4	6
NP_653316	EFHB	NP_766085	Efhb	XP_001053955	Efhb_predicted	-	-	-	-
NP_055489	EDEM1	NP_619618	Edem1	XP_001075914	RGD1563633_predicted	3	-	6	-
NP_056457	ZBTB20	NP_062752	Zbtb20	XP_001060580	Zbtb20_predicted	1	4	31	-
NP_055843	TNIK	---	Tnik	XP_001057689	RGD1561817_predicted	1	-	34	-
NP_055518	VPRBP	NP_001015507	Vprbp	XP_001071998	RGD1305176_predicted	-	-	1	-
NP_002208	ITIH3	NP_032433	Itih3	NP_059047	Itih3	-	9	-	4
NP_000530	RHO	NP_663358	Rho	NP_254276	Rho	2	14	-	1
NP_055938	FRMD4B	NP_660130	Frmd4b	XP_001077268	Frmd4b	1	1	-	5
NP_004615	VIPR1	NP_035833	Vipr1	NP_036817	Vipr1	12	-	-	4
NP_001035842	CEP63	NP_001074591	Cep63	NP_001032861	---	3	-	21	4
NP_001631	APEH	NP_666338	Apeh	NP_036632	Apeh	-	1	11	2
NP_056257	CNOT10	NP_705813	Cnot10	NP_001007004	Cnot10	15	17	1	2
NP_055824	PDZRN3	NP_061372	Pdzrn3	XP_001075473	Pdzrn3_predicted	5	-	1	1
NP_002933	ROBO2	NP_780758	Robo2	XP_001064680	Robo2	-	2	1	-
NP_689749	FGD5	NP_766319	Fgd5	XP_001076619	Fgd5_predicted	1	-	34	6
NP_057682	ZDHHC3	NP_081193	Zdhhc3	NP_001034103	Zdhhc3	-	1	37	5
NP_079439	PIGZ	NP_766410	Pigz	---	---	-	-	-	-
NP_000088	CPOX	NP_031783	Cpox	NP_001032172	Cpox	4	3	1	2
NP_004724	SLC33A1	NP_056543	Slc33a1	NP_071588	Slc33a1	3	1	-	3
NP_003169	SYN2	NP_038709	Syn2	NP_001029192	Syn2	6	2	-	1
NP_000830	GRM2	XP_001475864	Grm2	XP_001073809	Grm2	13	12	-	-
NP_077817	CEP70	NP_076362	Cep70	NP_001017470	---	-	12	25	-
NP_002533	OGG1	NP_035087	Ogg1	NP_110497	Ogg1	6	4	23	-
NP_006632	CCR9	NP_034043	Ccr9	NP_758832	Ccr9	1	2	-	-
NP_005823	KCNMB2	NP_082507	Kcnmb2	NP_789831	Kcnmb2	-	-	4	1
NP_004247	SLC22A13	NP_598741	Slc22a13	XP_001077418	Slc22a13_predicted	-	2	4	1
NP_009296	HYAL1	NP_032343	Hyal1	NP_997499	Hyal1	-	-	-	4
NP_054798	KLF15	NP_075673	Klf15	NP_445988	Klf15	8	3	2	5
NP_001073884	---	NP_080752	2610101N10Rik	XP_001064961	RGD1307882_predicted	4	1	1	3
XP_001133294	C3orf41	NP_808411	C730027P07Rik	XP_001078210	RGD1305157_predicted	16	9	1	-
NP_066000	SLC7A14	NP_766449	Slc7a14	XP_001061357	---	1	14	-	1
---	CCDC39	NP_080498	Ccdc39	XP_001060985	Ccdc39_predicted	10	3	-	1
NP_705833	---	NP_777273	BC043118	XP_001057435	RGD1305628_predicted	-	-	19	-
NP_001033794	GPR149	NP_796320	Gpr149	NP_620246	Gpr149	27	3	2	1
NP_001012337	ROPN1B	NP_109669	Ropn1	NP_001020799	Ropn1	1	-	31	1
NP_004626	MAPKAPK3	NP_849238	Mapkapk3	NP_001012127	Mapkapk3	15	-	-	-
NP_849193	STT3B	NP_077184	Stt3b	---	RGD1311563	3	-	-	2
NP_003916	MBD4	NP_034904	Mbd4	XP_001054223	---	2	-	9	-
NP_055260	---	NP_109610	D3Ucla1	NP_110462	RAMP4	3	9	17	2
NP_057225	DYNC1LI1	NP_666341	Dync1li1	NP_665715	Dync1li1	2	-	11	3
NP_067640	SENP2	NP_083733	Senp2	NP_076479	Senp2	16	1	1	1
NP_000046	BCHE	NP_033868	Bche	NP_075231	Bche	1	1	1	4
NP_054768	ACAD9	NP_766266	Acad9	XP_001059349	Acad9	3	1	-	2
XP_496644	---	---	Snhg8	XP_001062546	RGD1307583_predicted	-	2	23	2
NP_006832	SLC38A3	NP_076294	Slc38a3	NP_665719	Slc38a3	1	3	-	4
NP_001074924	P2RY14	NP_001008497	P2ry14	NP_598261	P2ry14	1	2	1	7
NP_005042	QARS	NP_598555	Qars	NP_001007625	---	9	-	1	2
NP_060608	TBCCD1	NP_001074837	Tbccd1	NP_001012016	Crygs	-	5	-	5
NP_004258	CHST2	NP_061233	Chst2	XP_001068574	Chst2_predicted	-	-	-	-
NP_005920	MFI2	NP_038928	Mfi2	XP_001073388	Mfi2_predicted	-	2	-	6
NP_071735	ZFYVE20	NP_084357	Zfyve20	XP_001067363	---	-	-	11	5
NP_001020243	C3orf17	NP_666084	BC027231	NP_001009678	RGD1311458	-	8	-	3
NP_653243	SYNPR	NP_082328	Synpr	NP_076464	Synpr	-	-	-	-
NP_000676	AGTR1	NP_796296	Agtr1a	NP_112271	Agtr1b	-	1	-	3
NP_003839	SUCLG2	NP_035637	Suclg2	XP_001064568	Suclg2	1	1	-	4
NP_006362	CRTAP	NP_064306	Crtap	XP_001076702	RGD1565180_predicted	20	-	-	2
NP_000679	ALAS1	NP_065584	Alas1	NP_077810	Alas1	1	-	-	4
NP_057300	DBR1	NP_113580	Dbr1	XP_001058421	---	2	-	-	4
NP_115639	IQCG	NP_848465	Iqcg	NP_001014252	Iqcg	-	2	1	-
NP_004628	RAB7A	NP_033031	Rab7	NP_076440	Rab7	23	-	-	-
NP_001011655	TMEM44	NP_766202	Tmem44	XP_001062650	RGD1563737_predicted	13	4	-	-
NP_006345	TADA3L	NP_598693	Tada3l	NP_001020905	---	20	1	25	5
NP_001003931	PARP3	NP_663594	Parp3	NP_001008329	Parp3	2	10	1	2
NP_003491	ACOX2	NP_444345	Acox2	NP_665713	Acox2	1	3	-	8
NP_066278	MST1	NP_032269	Mst1	NP_077328	Mst1	-	12	-	-
NP_003866	GMPS	NP_001028472	Gmps	NP_001019925	Gmps	3	1	1	3
NP_057386	CRBN	NP_067424	Crbn	NP_001015003	Crbn	4	1	-	-
NP_004794	SLC22A14	NP_001032838	Slc22a14	XP_001077404	Slc22a14_predicted	4	14	-	-
NP_001035998	MINA	NP_080186	Mina	NP_695221	Mina	32	-	-	2
NP_056957	VILL	NP_035830	Vill	XP_001077346	Vill_predicted	-	-	22	-
NP_659508	CISH	NP_034025	Cish	XP_001074104	Cish	-	-	-	5
NP_005593	CLDN11	NP_032796	Cldn11	NP_445909	Cldn11	-	-	-	6
NP_060763	ZNF654	NP_082335	Zfp654	XP_001063334	RGD1308321_predicted	2	-	-	3
NP_997190	C3orf25	NP_941005	BC060267	XP_001054158	---	-	-	-	-
NP_006300	LRRFIP2	NP_082018	Lrrfip2	NP_001019932	Lrrfip2	-	1	26	3
NP_877437	SUMF1	NP_666049	Sumf1	XP_001078283	Sumf1_predicted	1	-	1	8
NP_060867	CHDH	NP_758468	Chdh	NP_942026	Chdh	1	-	-	4
NP_001286	CCR1	NP_034042	Ccr1	NP_065417	Ccr1	5	-	-	6
NP_001013456	FXR1	NP_032079	Fxr1h	NP_001012179	Fxr1h	4	8	35	3
NP_000307	PTHR1	NP_001077404	Pthr1	NP_064458	Pthr1	-	4	1	9
NP_940906	PAQR9	NP_940806	Paqr9	XP_001068629	Paqr9_predicted	-	-	33	11
NP_079147	MAP6D1	NP_941001	Map6d1	XP_001060081	RGD1560102_predicted	-	17	-	2
NP_003959	UBE1C	NP_035796	Ube1c	NP_476553	Ube1c	2	1	1	3
NP_055390	SCHIP1	NP_038956	Schip1	XP_001061765	Schip1	-	2	1	9
NP_008955	TMEM115	NP_062678	Tmem115	XP_001074283	Tmem115_predicted	28	-	-	5
NP_001034200	TRIM71	NP_001035968	Trim71	XP_001076764	RGD1566388_predicted	14	-	-	1
NP_000472	AMT	NP_001013836	EG434437	NP_001014026	Amt	1	2	36	7
NP_006091	ST3GAL6	NP_061254	St3gal6	NP_997485	St3gal6	13	-	15	4
NP_001020018	TGFBR2	NP_033397	Tgfbr2	NP_112394	Tgfbr2	2	2	24	-
NP_068756	EEFSEC	NP_075547	Eefsec	XP_001075510	RGD1560552_predicted	4	8	-	4
NP_872434	CCDC37	XP_001479625	Ccdc37	XP_001076288	Ccdc37_predicted	25	3	-	1
NP_066928	PLSCR1	NP_035766	Plscr1	NP_476542	Plscr1	2	2	5	6
NP_064703	CCNL1	NP_064321	Ccnl1	NP_446114	Ccnl1	20	1	36	5
NP_653318	IL20RB	NP_001028715	Il20rb	XP_001071171	RGD1566151_predicted	-	-	9	-
NP_002173	IL1RAP	NP_032390	Il1rap	NP_037100	Il1rap	1	-	-	-
NP_115731	MON1A	NP_082645	Mon1a	XP_001074544	Mon1a_predicted	18	1	-	2
NP_055181	GNL3	NP_705775	Gnl3	NP_783170	Gnl3	3	10	21	3
NP_060873	DCP1A	NP_598522	Dcp1a	XP_001063126	Dcp1a_predicted	-	7	4	1
NP_060241	PXK	NP_663433	Pxk	NP_877973	Pxk	-	-	28	4
NP_115876	---	NP_083966	---	XP_001065199	RGD1561457_predicted	3	-	-	7
NP_000051	BTD	NP_079571	Btd	NP_001012047	Btd	1	8	2	4
NP_001026873	TMEM103	NP_001074850	Tmem103	XP_001075724	Tmem103_predicted	-	5	1	1
NP_006565	CSPG5	NP_038912	Cspg5	NP_062157	Cspg5	-	-	1	-
NP_001055	TKT	NP_033414	Tkt	NP_072114	Tkt	1	1	-	2
NP_776186	RABL3	NP_001035964	Rabl3	XP_001061761	Rabl3_predicted	11	-	-	-
NP_064616	KTELC1	NP_759012	9630046K23Rik	XP_001069417	RGD1306248	3	3	-	-
NP_940865	---	NP_083210	4930452B06Rik	NP_001014159	---	-	-	-	6
NP_001007566	TFG	NP_062652	Tfg	NP_001012144	Tfg	3	3	1	2
NP_001020376	AP2M1	NP_033809	Ap2m1	NP_446289	Ap2m1	7	8	2	2
NP_060478	FEZF2	NP_536681	Fezf2	XP_001060067	Zfp312_predicted	-	3	-	-
NP_065078	NKIRAS1	NP_076015	Nkiras1	XP_001067073	Nkiras1_predicted	4	-	-	2
NP_835471	NMNAT3	NP_653116	Nmnat3	NP_001013242	Nmnat3	1	11	-	-
NP_060331	PIGX	NP_077784	Pigx	XP_001073238	Pigx	-	-	-	-
NP_057456	GPR175	NP_036036	Gpr175	NP_445986	Gpr175	18	1	-	4
NP_004292	ACTL6A	NP_062647	Actl6a	NP_001034122	Actl6a	3	1	1	3
NP_001015887	IGSF11	NP_733548	Igsf11	NP_001013138	Igsf11	31	-	18	-
NP_886552	TRNT1	NP_081572	Trnt1	NP_001019432	Trnt1	2	1	1	-
NP_699162	KCTD6	NP_082058	Kctd6	XP_001070711	Kctd6_predicted	-	-	-	-
NP_116139	ABHD14B	NP_083907	Abhd14b	NP_001007665	Abhd14b	3	1	1	3
NP_000523	PCCB	NP_080111	Pccb	NP_058726	Pccb	1	-	1	4
NP_000452	THRB	NP_033406	Thrb	NP_036804	Thrb	32	2	1	1
NP_000451	THPO	NP_033405	Thpo	NP_112395	Thpo	19	3	-	5
NP_056259	TMEM158	NP_001002267	Tmem158	NP_476560	Ris1	-	3	-	-
NP_000378	SLC25A20	NP_065266	Slc25a20	NP_446417	Slc25a20	1	1	-	4
NP_056980	ZMYND10	NP_444483	Zmynd10	NP_001004284	Zmynd10	4	-	2	-
NP_001009937	SLC25A26	NP_080531	Slc25a26	XP_001074413	Slc25a26_predicted	-	-	23	-
NP_009113	RASSF1	NP_062687	Rassf1	NP_001007755	Rassf1	7	6	1	5
NP_065758	HHATL	NP_083371	Hhatl	XP_001078610	Gup1_predicted	-	2	-	-
NP_055188	GPR160	XP_130823	Gpr160	NP_001020318	---	6	2	3	6
NP_004148	PRKAR2A	NP_032950	Prkar2a	NP_062137	Prkar2a	3	-	15	-
NP_055398	LMCD1	NP_659048	Lmcd1	NP_001008562	Lmcd1_predicted	5	6	15	5
NP_056984	PLA1A	NP_598863	Pla1a	NP_620237	---	1	-	5	-
NP_004616	WNT7A	NP_033553	Wnt7a	XP_001062984	Wnt7a	1	17	-	-
NP_775107	TRIM59	NP_080139	Trim59	XP_001062051	Trim59_predicted	5	13	2	10
NP_079103	HDAC11	NP_659168	Hdac11	XP_001073226	Hdac11_predicted	2	1	1	3
NP_002619	PFN2	NP_062283	Pfn2	NP_110500	Pfn2	1	2	-	-
NP_001598	ACAA1	NP_666342	Acaa1b	NP_036621	Acaa1	1	3	-	8
NP_009206	TUSC2	NP_062716	Tusc2	XP_001072836	---	1	-	-	4
NP_002061	GNAI2	NP_032164	Gnai2	NP_112297	Gnai2	2	1	5	-
NP_006801	PDIA5	NP_082571	Pdia5	NP_001014147	Pdia5	25	6	-	-
NP_996898	NAALADL2	---	EG635702	XP_001062720	RGD1565147_predicted	6	1	-	-
NP_001017928	CCDC58	NP_941047	Ccdc58	XP_001071079	Ccdc58_predicted	-	3	1	-
NP_000884	KNG1	NP_001095879	Kng2	NP_036873	---	1	2	-	-
NP_071418	POPDC2	NP_001075453	Popdc2	NP_954544	Popdc2	24	3	1	1
NP_001861	CPA3	NP_031779	Cpa3	XP_001056211	Cpa3	-	-	-	7
NP_003562	BFSP2	NP_001002896	Bfsp2	XP_001069678	---	31	-	-	-
NP_009215	TWF2	NP_036006	Twf2	XP_001070490	---	-	2	3	6
NP_055190	FETUB	NP_001077373	Fetub	NP_445800	Fetub	1	2	-	-
NP_057390	DNAJB11	NP_080676	Dnajb11	NP_001015021	Dnajb11	3	16	17	2
NP_001010983	GLT8D1	NP_083902	Glt8d1	NP_001007684	Glt8d1	8	4	-	13
NP_004042	BDH1	NP_780386	Bdh1	NP_446447	Bdh1	1	-	-	4
NP_001077	AADAC	NP_075872	Aadac	NP_065413	Aadac	1	-	1	4
NP_055060	RNF7	NP_035409	Rnf7	XP_001065291	Rnf7_predicted	2	1	17	3
NP_001651	ARF4	NP_031505	Arf4	NP_077065	Arf4	2	3	1	3
NP_071906	AZI2	NP_001041611	Azi2	NP_001020876	Azi2	2	1	-	3
NP_001097	ACVR2B	NP_031423	Acvr2b	NP_113742	Acvr2b	-	6	27	-
NP_940965	TMEM110	NP_083115	Tmem110	NP_942069	Tmem110	31	-	22	5
NP_005008	PCYT1A	NP_034111	Pcyt1a	NP_511177	Pcyt1a	1	-	9	5
NP_009090	SLMAP	NP_114397	Slmap	XP_001057214	Slmap_predicted	2	1	-	3
NP_005016	SERPINI1	NP_033276	Serpini1	NP_446231	Serpini1	2	1	2	-
NP_057010	TEX264	NP_001075123	Tex264	NP_001007666	Tex264	3	1	1	2
NP_055035	TM4SF1	NP_032562	Tm4sf1	XP_001060042	Tm4sf1_predicted	8	-	3	6
NP_002329	LSAMP	NP_780757	Lsamp	NP_058938	Lsamp	-	2	1	1
NP_057015	C3orf32	NP_780734	D630042P16Rik	XP_001078533	RGD1562010_predicted	-	-	17	-
NP_004695	RRP9	NP_663595	Rrp9	XP_001071554	Rnu3ip2_predicted	1	2	-	-
NP_001613	AHSG	NP_038493	Ahsg	NP_037030	Ahsg	1	3	-	8
NP_001012409	SGOL1	NP_082508	Sgol1	XP_001065750	---	10	2	-	1
NP_000787	DRD3	NP_031903	Drd3	NP_058836	Drd3	2	13	1	-
NP_073625	P2RY12	NP_081847	P2ry12	NP_073637	P2ry12	-	2	3	6
NP_997234	PRRT3	NP_766075	Prrt3	XP_001076954	RGD1562419_predicted	2	2	2	1
NP_001020130	ARPC4	NP_080828	Arpc4	XP_001078712	Arpc4_predicted	2	1	-	2
NP_005098	ENDOGL1	NP_766044	Endogl1	XP_001077489	Endogl1_predicted	7	13	-	-
NP_005515	HES1	---	Hes1	NP_077336	Hes1	-	12	1	5
NP_443721	CLRN1	NP_700433	Clrn1	NP_695211	Ush3a	-	8	-	-
NP_940962	LHFPL4	NP_808431	Lhfpl4	NP_852052	Lhfpl4	-	3	2	2
NP_000873	IL12A	NP_032377	Il12a	NP_445842	Il12a	21	-	-	-
NP_004608	TM4SF4	NP_663514	Tm4sf4	NP_446237	Tm4sf4	1	-	-	-
NP_699184	LRRC34	NP_082217	Lrrc34	NP_001038161	RGD1565052_predicted	-	-	-	-
NP_057090	ABHD5	NP_080455	Abhd5	NP_997689	---	4	1	-	-
NP_005778	ALG3	NP_666051	Alg3	NP_001011897	Alg3	1	1	1	2
NP_068754	PROK2	NP_001032628	Prok2	NP_001032630	Prok2	-	-	-	6
NP_612390	OXNAD1	NP_663435	Oxnad1	XP_001057360	Oxnad1_predicted	1	-	1	-
NP_940967	LRRC33	NP_666181	Lrrc33	NP_001020166	Lrrc33	-	2	3	6
NP_001093422	ITPR1	NP_034715	Itpr1	NP_001007236	Itpr1	2	1	6	-
NP_000085	COL7A1	NP_031764	Col7a1	XP_001075419	Col7a1_predicted	2	-	-	-
NP_073594	CCDC14	NP_766412	Ccdc14	XP_001071774	RGD1562189_predicted	-	-	-	1
NP_849144	IGSF10	XP_892248	Igsf10	NP_942063	Igsf10	27	-	1	7
NP_003606	SLC4A7	NP_001028442	Slc4a7	NP_478118	Slc4a7	21	-	30	-
NP_443728	MED12L	---	Med12l	XP_001061688	---	3	-	1	2
NP_002932	ROBO1	NP_062286	Robo1	NP_071524	Robo1	5	-	-	7
NP_054878	SETD2	NP_001074809	Setd2	XP_001075829	Kif9_predicted	-	1	4	1
NP_891550	ADAMTS9	---	Adamts9	XP_001076761	Adamts9_predicted	1	3	-	6
NP_079199	NUP210	NP_061285	Nup210	NP_445774	Pom210	28	1	1	-
NP_000711	CACNA1D	NP_001077085	Cacna1d	NP_058994	Cacna1d	1	-	1	-
NP_002664	PLXNB1	NP_766363	Plxnb1	XP_001075514	Plxnb1_predicted	18	-	-	4
NP_073600	FNDC3B	NP_775274	Fndc3b	XP_001057133	Fndc3b_predicted	3	1	22	3
NP_002709	PPP2R3A	XP_001474446	3222402P14Rik	XP_001059170	Ppp2r3a	-	-	1	9
NP_055559	TBC1D5	NP_082438	Tbc1d5	XP_001056443	RGD1561626_predicted	-	2	-	-
NP_056391	ERC2	NP_808482	Erc2	NP_740768	---	14	3	-	-
NP_563615	DCBLD2	NP_082799	Dcbld2	NP_569103	Dcbld2	4	7	2	1
NP_037418	RBM15B	---	Rbm15b	XP_001074007	Rbm15b_predicted	15	-	9	4
NP_001032	SI	NP_001074606	2010204N08Rik	NP_037193	Si	-	-	-	1
NP_570843	LRRC15	NP_083249	Lrrc15	NP_659551	Lrrc15	3	-	4	-
NP_444253	MYLK	NP_647461	Mylk	XP_001071705	Mylk_predicted	1	3	1	5
NP_003383	WNT5A	NP_033550	Wnt5a	NP_072153	Wnt5a	-	4	20	-
NP_005224	EPHA3	NP_034270	Epha3	NP_113752	Epha3	5	-	-	-
NP_056375	OPA1	NP_598513	Opa1	NP_598269	Opa1	2	1	-	3
NP_002283	LAMB2	NP_032509	Lamb2	NP_037106	Lamb2	2	2	1	7
NP_002568	PAK2	NP_796300	Pak2	NP_445758	Pak2	3	-	22	-
NP_001018881	ABCC5	NP_038818	Abcc5	NP_446376	Abcc5	9	2	-	6
NP_002832	PTPRG	NP_033007	Ptprg	NP_599183	Ptprg	3	-	-	-
NP_057257	HEMK1	NP_598745	Hemk1	XP_001074150	Hemk1_predicted	4	-	-	2
NP_000893	MME	NP_032630	Mme	NP_036740	Mme	1	18	-	4
NP_002653	PLD1	NP_032901	Pld1	NP_112254	Pld1	1	1	-	6
NP_665696	PHLDB2	NP_700461	Phldb2	XP_001064525	RGD1308084	2	11	1	5
NP_056356	LRIG1	NP_032403	Lrig1	XP_001076882	Lrig1_predicted	-	6	-	-
NP_056281	PTPN23	NP_001074512	Ptpn23	NP_476552	Ptpn23	-	2	1	5
NP_004479	GP5	NP_032174	Gp5	NP_036927	Gp5	1	-	-	-
NP_001059	TOP2B	NP_033435	Top2b	XP_001067768	---	2	1	-	3
NP_001094064	SNRK	NP_598502	Snrk	NP_620188	Snrk	1	-	-	5
NP_009115	NISCH	NP_073147	Nisch	XP_001057307	Nisch	13	-	-	3
NP_055055	LIMD1	NP_038888	Limd1	XP_001078972	Limd1_predicted	-	1	-	-
NP_653234	KCNH8	NP_001026981	Kcnh8	NP_659563	Kcnh8	-	-	-	1
NP_004414	DVL3	NP_031915	Dvl3	XP_001059597	Dvl3_predicted	2	-	-	1
NP_783200	CNTN4	NP_766592	Cntn4	NP_446331	Cntn4	5	-	4	-
NP_003225	TFRC	NP_035768	Tfrc	XP_001072774	Tfrc	-	-	-	-
NP_057285	AMOTL2	NP_062738	Amotl2	XP_001060762	Amotl2	3	6	-	-
NP_055417	PIK3R4	NP_001074778	Pik3r4	XP_001070149	Pik3r4_predicted	1	-	-	-
NP_055747	NLGN1	NP_619607	Nlgn1	NP_446320	Nlgn1	10	-	-	1
NP_000379	CASR	NP_038831	Casr	NP_058692	Casr	-	-	-	1
NP_003713	TP73L	NP_035771	Trp63	NP_062094	Trp63	11	-	-	-
NP_078788	LRRC2	NP_083114	Lrrc2	NP_001012001	Lrrc2	-	-	13	1
NP_056275	MYRIP	NP_653140	Myrip	NP_878264	Myrip	4	2	-	-
NP_002366	MAP4	NP_032659	Mtap4	NP_001019449	---	1	2	6	4
NP_000239	MITF	NP_032627	Mitf	XP_001065288	Mitf	6	2	1	6
NP_060635	PBRM1	NP_001074720	---	XP_001059112	RGD1565549_predicted	-	1	-	-
NP_001008393	CTDSPL	NP_598471	Ctdspl	XP_001077330	Ctdspl_predicted	8	-	8	4
NP_001070671	SENP7	NP_001003971	Senp7	XP_001057745	Senp7_predicted	4	-	1	-
NP_064548	SEMA3G	NP_001020550	Sema3g	XP_001062426	Sema3g	13	2	-	7
NP_001036111	TRAK1	NP_780323	Trak1	XP_001077998	RGD1307844_predicted	25	-	-	-
NP_003875	PCAF	NP_064389	Pcaf	NP_001019423	Pcaf	4	-	1	-
NP_115759	HPS3	NP_542365	Hps3	XP_001055734	Hps3_predicted	-	1	-	-
NP_003033	SLC6A1	NP_848818	Slc6a1	NP_077347	Slc6a1	1	-	-	1
NP_003880	NR1I2	NP_001091874	Nr1i2	NP_443212	Nr1i2	1	3	2	4
NP_078824	LRRIQ2	NP_083091	Lrriq2	XP_001062300	Lrriq2_predicted	-	-	1	-
NP_004523	MUC4	---	Muc4	XP_001072593	Muc4	-	-	-	1
NP_055635	TOMM70A	NP_613065	Tomm70a	NP_997684	Tomm70a	2	1	1	4
NP_055111	CAPN7	NP_033926	Capn7	NP_001025208	Capn7	13	1	-	3
NP_005117	NR1D2	NP_035714	Nr1d2	NP_671743	Nr1d2	4	-	4	-
NP_065843	AADACL1	NP_848887	Aadacl1	---	---	5	3	-	6
NP_065851	IFT80	NP_080917	Ift80	NP_001013933	Ift80	29	3	2	5
NP_056014	ANKRD28	NP_001019775	Ankrd28	XP_001057585	RGD1559931_predicted	6	1	-	-
NP_150279	BOC	NP_766094	Boc	XP_001060215	Boc_predicted	13	2	-	7
NP_055741	SLITRK3	NP_942564	Slitrk3	XP_001068121	Slitrk3_predicted	-	3	13	9
NP_073613	OSBPL11	NP_789810	Osbpl11	XP_001065111	Osbpl11_predicted	-	1	1	-
NP_114436	B3GNT5	NP_473393	B3gnt5	XP_001060426	B3gnt5	21	3	-	1
NP_852466	ZNF445	NP_775540	Zfp445	XP_001078410	RGD1559144_predicted	4	1	11	3
NP_003462	KCNAB1	NP_034727	Kcnab1	NP_058999	Kcnab1	1	-	-	1
NP_060501	WDR6	NP_113569	Wdr6	---	Wdr6	2	-	-	-
NP_003295	TRPC1	NP_035773	Trpc1	NP_446010	Trpc1	5	-	2	-
NP_004445	ETV5	NP_076283	Etv5	XP_001057770	Etv5_predicted	-	-	3	6
NP_005621	SLCO2A1	NP_201571	Slco2a1	NP_073158	Slco2a1	-	2	1	-
NP_000324	ATXN7	NP_631973	Atxn7	XP_001069337	RGD1562692_predicted	-	2	37	-
NP_001078518	MRAS	NP_032650	Mras	NP_037113	Mras	9	1	-	-
NP_060568	ECT2	NP_031926	Ect2	XP_001057016	Ect2_predicted	3	2	2	10
NP_733762	CBLB	NP_001028410	Cblb	NP_598285	Cblb	5	-	12	9
NP_006312	ARIH2	NP_035920	Arih2	NP_001012275	Arih2_predicted	15	-	21	2
NP_004432	EPHB1	NP_775623	Ephb1	XP_001059882	Ephb1	2	2	-	-
NP_001005474	NFKBIZ	NP_085115	Nfkbiz	XP_001062534	Nfkbiz_predicted	-	6	-	5
NP_055781	DHX30	NP_579925	Dhx30	NP_001013267	Dhx30	1	1	4	1
NP_056323	TIPARP	NP_849223	Tiparp	XP_001060648	Tiparp_predicted	7	5	-	5
NP_899200	ADCY5	NP_001012783	Adcy5	NP_072122	Adcy5	-	3	-	-
NP_060732	IFT122	NP_112454	Ift122	XP_001054604	Wdr10	1	2	-	-
NP_001957	EHHADH	NP_076226	Ehhadh	NP_598290	Ehhadh	1	16	22	4
NP_000926	PLOD2	NP_036091	Plod2	NP_787065	Plod2	3	-	-	6
NP_003148	NEK4	NP_035979	Nek4	XP_001060008	Nek4	2	4	15	4
NP_005099	XYLB	NP_001028381	Xylb	NP_001028876	Xylb	1	-	1	-
NP_065890	WDR48	NP_080512	Wdr48	XP_001077618	Wdr48_predicted	-	-	-	-
NP_009016	FSTL1	NP_032073	Fstl1	NP_077345	Fstl1	-	1	1	7
NP_003354	USP4	NP_035808	Usp4	XP_001074575	---	7	1	37	3
NP_000570	CCR5	NP_034047	Ccr5	NP_446412	Ccr5	5	-	3	6
NP_001091679	CTNNB1	NP_031640	Ctnnb1	NP_445809	Ctnnb1	-	1	9	-
NP_037468	SEC61A1	NP_058602	Sec61a1	NP_954865	Sec61a1	1	1	1	2
NP_001697	BCL6	NP_033874	Bcl6	XP_001055978	Bcl6_predicted	8	-	-	-
NP_004619	XPC	NP_033557	Xpc	XP_001073450	Xpc_predicted	-	2	17	5
NP_005768	RBM6	NP_035381	Rbm6	XP_001073958	RGD1560367_predicted	2	5	-	-
NP_001780	CDC25A	NP_031684	Cdc25a	NP_598255	Cdc25a	2	-	1	4
NP_057643	PEX5L	NP_067458	Pex2	NP_775175	Pex2	14	-	20	1
NP_062455	ARHGEF3	NP_082147	Arhgef3	XP_001055379	Arhgef3_predicted	5	5	1	5
NP_075050	ACTR8	NP_081769	Actr8	XP_001063449	Actr8_predicted	2	1	-	-
NP_055276	CNTN6	NP_059079	Cntn6	NP_037357	Cntn6	22	2	-	-
NP_055313	GOLPH4	NP_780402	Golph4	XP_001062460	Golph4	-	1	35	-
NP_060868	CACNA2D3	---	Cacna2d3	NP_783185	Cacna2d3	10	8	-	1
NP_115545	ACAD11	NP_780533	Acad11	XP_001072510	Acad11_predicted	1	-	-	4
NP_057359	---	NP_001035486	2810407C02Rik	NP_001014275	Selt	2	-	-	3
NP_775814	DZIP1L	NP_082534	Dzip1l	NP_001014117	Dzip1l	14	-	-	1
NP_004558	PFKFB4	NP_766607	Pfkfb4	NP_062206	Pfkfb4	9	2	2	6
NP_078904	SLC12A8	NP_001077371	Slc12a8	NP_705889	Slc12a8	11	2	-	1
NP_064620	BBX	NP_081720	Bbx	NP_001073407	Bbx_predicted	-	1	-	3
NP_001116	ADPRH	NP_031440	Adprh	NP_899154	Adprh	22	2	-	6
NP_000331	SLC2A2	NP_112474	Slc2a2	NP_037011	Slc2a2	1	1	18	4
NP_001005158	SFMBT1	NP_062333	Sfmbt1	NP_113835	Sfmbt1	-	1	25	3
NP_066924	CLDN1	NP_057883	Cldn1	NP_113887	Cldn1	7	-	14	4
NP_004517	MCM2	NP_032590	Mcm2	XP_001072364	Mcm2_predicted	-	2	2	10
---	ECE2	---	Ece2	NP_001002815	Ece2	4	9	1	-
NP_284941	MFN1	NP_077162	Mfn1	NP_620432	Mfn1	2	-	-	3
NP_001020239	---	NP_083031	---	XP_001076474	Ppp1r1c	-	7	-	1
NP_079223	PHC3	NP_700470	Phc3	XP_001058534	Phc3_predicted	-	6	-	5
NP_006536	TUSC4	NP_061367	Tusc4	NP_001020915	Tusc4	-	-	-	-
NP_002907	RFC4	NP_663455	Rfc4	XP_001056509	Rfc4_predicted	3	-	2	1
NP_776185	C3orf38	NP_080549	4930453N24Rik	NP_001005552	---	2	1	1	3
NP_057673	C3orf1	NP_077235	4930455C21Rik	NP_001007677	RGD1359380	2	1	-	-
NP_612419	CMTM7	NP_598739	Cmtm7	XP_001076838	---	5	1	3	6
NP_037402	---	NP_666339	---	---	---	2	2	-	-
NP_001225	CAV3	NP_031643	Cav3	NP_062028	Cav3	6	7	-	1
NP_055629	PSMD6	NP_079826	Psmd6	NP_942025	Psmd6	2	1	1	3
NP_036240	---	NP_064376	AI586015	NP_001020286	RGD1311584	14	-	3	-
NP_001035190	---	NP_035072	Nsg1	NP_077042	Nsg1	14	-	17	-
NP_001766	CD38	NP_031672	Cd38	NP_037259	Cd38	3	3	3	6
NP_000311	QDPR	NP_077198	Qdpr	NP_071785	Qdpr	1	-	26	4
NP_000576	IL15	NP_032383	Il15	NP_037261	Il15	-	2	1	-
NP_060315	COMMD8	NP_848714	Commd8	XP_001069497	Commd8_predicted	2	-	-	1
NP_004325	BST1	NP_033893	Bst1	NP_110475	Bst1	-	-	3	6
NP_009124	ANXA10	NP_036052	Anxa10	XP_001071546	RGD1560956_predicted	1	3	12	4
NP_002349	MAD2L1	NP_062372	Mad2l1	XP_001061025	Mad2l1_predicted	-	2	2	10
NP_872412	TMPRSS11A	NP_001028405	Tmprss11a	XP_001074837	---	-	-	-	1
NP_055280	SULT1B1	NP_063931	Sult1b1	NP_071958	Sult1b1	25	2	31	4
NP_005105	HS3ST1	NP_034604	Hs3st1	NP_445843	Hs3st1	12	2	5	-
NP_001720	BTC	NP_031594	Btc	NP_071592	Btc	10	2	1	9
NP_002120	HMGB2	NP_032278	Hmgb2	XP_001054623	Hmgb2	-	2	2	10
NP_061856	NOLA1	NP_080854	Nola1	NP_001019477	---	3	-	1	2
NP_064621	MRPL1	NP_001034173	Mrpl1	XP_001069850	Mrpl1_predicted	2	8	24	3
NP_115884	---	NP_783199	---	NP_598305	Hod	5	2	3	6
NP_001030175	KCNIP4	NP_084541	Kcnip4	NP_852030	Kcnip4	-	-	-	1
NP_001648	AREG	NP_033834	Areg	NP_058819	Areg	26	3	-	1
NP_001035861	ASAHL	NP_080248	Asahl	NP_001010967	Asahl_predicted	1	2	3	6
NP_116012	---	NP_080634	4930583H14Rik	XP_001056112	---	10	17	-	1
NP_001556	CXCL10	NP_067249	Cxcl10	NP_620789	Cxcl10	-	2	5	6
NP_005236	FAT	NP_001074755	Fat1	NP_114007	Fath	-	3	-	5
NP_932069	SLC10A6	NP_083691	Slc10a6	NP_932166	Soat	14	5	8	5
NP_071325	SLC26A1	NP_777359	Slc26a1	NP_071623	Slc26a1	1	3	-	4
NP_001139	ANK2	NP_001029340	Ank2	XP_001076082	Ank2	31	3	-	1
NP_001544	IGFBP7	NP_032074	Igfbp7	NP_001013066	Igfbp7	5	2	17	7
NP_003855	SAP30	NP_068560	Sap30	XP_001054754	---	2	3	2	-
NP_115593	ANKRD17	NP_112148	Ankrd17	XP_001072667	RGD1562348_predicted	-	-	-	-
NP_002080	CXCL2	NP_032202	Cxcl1	NP_110472	Cxcl1	15	11	5	5
NP_064524	BDH2	NP_081484	Bdh2	XP_001075590	Bdh2_predicted	1	16	1	4
NP_001804	CENPE	NP_776123	Cenpe	XP_001077739	Cenpe_predicted	-	2	32	10
NP_006255	PTPN13	NP_035334	Ptpn13	XP_001059696	---	5	2	-	1
NP_001091954	SLC4A4	NP_061230	Slc4a4	NP_445876	Slc4a4	1	-	36	4
NP_065910	SHROOM3	NP_001071063	Shroom3	XP_001070669	RGD1310470	-	2	8	1
NP_068605	UCP1	NP_033489	Ucp1	NP_036814	Ucp1	-	-	-	1
NP_067651	AFAP1	NP_081649	Afap1	NP_543176	Afap	-	-	-	1
NP_000577	IL2	NP_032392	Il2	NP_446288	Il2	16	13	-	1
NP_001096123	OTUD4	NP_001074633	Otud4	XP_001074219	Otud4	6	1	1	3
NP_001997	FGF2	NP_032032	Fgf2	NP_062178	Fgf2	2	-	2	1
NP_006197	PDGFRA	NP_001076785	Pdgfra	XP_001067574	Pdgfra	-	3	19	7
NP_065186	ATP10D	NP_700438	Atp10d	XP_341210	---	-	-	3	-
NP_859077	ANKRD37	NP_001034651	Ankrd37	XP_001061163	RGD1565715_predicted	-	5	1	5
NP_056051	LPHN3	NP_941991	Lphn3	NP_570835	Lphn3	-	-	1	-
NP_037393	PPARGC1A	NP_032930	Ppargc1a	NP_112637	Ppargc1a	1	5	26	5
NP_065828	SORCS2	NP_112151	Sorcs2	XP_001063684	Sorcs2_predicted	-	-	-	1
NP_002244	KDR	NP_034742	Kdr	NP_037194	Kdr	-	11	1	6
NP_919258	LIN54	NP_766302	Lin54	XP_001056268	RGD1311361	2	1	1	3
NP_006306	PCGF3	NP_766304	Pcgf3	XP_001060303	Rnf3_predicted	2	2	-	1
NP_036356	NEK1	NP_780298	Nek1	XP_001053608	Nek1_predicted	6	1	17	-
NP_060697	UBE1L2	NP_766300	Ube1l2	XP_001074883	RGD1308324_predicted	-	1	2	-
NP_001035889	WHSC1	NP_001074571	Whsc1	---	---	9	4	2	4
NP_065911	STIM2	NP_001074572	Stim2	XP_001053661	Stim2_predicted	-	3	18	6
NP_000288	PKD2	NP_032887	Pkd2	XP_001058532	Pkd2_predicted	-	-	10	2
NP_031377	MMRN1	XP_284198	Mmrn1	XP_001065496	---	-	2	8	-
NP_006578	CORIN	NP_058565	Corin	NP_872279	Corin	22	-	25	-
NP_004778	SLIT2	NP_848919	Slit2	XP_001057837	Slit2	5	1	-	-
NP_065824	TBC1D14	NP_598671	Tbc1d14	NP_001012152	Tbc1d14	-	15	-	5
NP_004735	LRAT	NP_076113	Lrat	NP_071616	Lrat	-	2	1	-
NP_064544	SMARCAD1	NP_031984	Smarcad1	XP_001066395	Smarcad1_predicted	2	1	-	3
NP_001954	EGF	NP_034243	Egf	NP_036974	Egf	-	-	2	-
NP_003695	C4orf8	NP_001025477	BC037112	XP_001059938	RGD1309634_predicted	-	4	1	2
NP_056045	CENTD1	XP_001001363	Centd1	XP_001053361	Centd1_predicted	21	1	-	-
NP_001026893	DNAJB14	XP_001473223	Dnajb14	XP_001078145	---	2	-	13	3
NP_001036199	SEC24B	NP_997092	Sec24b	XP_001075268	Sec24b_predicted	4	3	1	-
NP_115946	USP38	NP_081830	Usp38	XP_001073885	Usp38_predicted	2	-	-	4
NP_001026870	C4orf18	NP_573450	1110032E23Rik	NP_954536	---	5	2	1	-
NP_001423	EREG	NP_031976	Ereg	NP_067721	Ereg	-	2	-	1
NP_001338	DGKQ	NP_950176	Dgkq	---	---	7	-	33	4
NP_689983	C4orf22	NP_001019785	1700007G11Rik	---	---	32	-	-	-
NP_002097	H2AFZ	NP_058030	H2afz	NP_073165	H2afz	3	-	2	10
NP_055300	---	NP_062328	Ptgds2	NP_113832	Ptgds2	-	7	3	6
NP_079481	MED28	NP_080171	Med28	XP_001059017	Med28_predicted	2	-	6	4
NP_079488	CXXC4	NP_001004367	Cxxc4	NP_445794	Cxxc4	31	14	-	1
NP_057703	PLAC8	NP_631937	Plac8	XP_001067597	Plac8_predicted	6	2	3	6
NP_001014446	OCIAD2	NP_081226	Ociad2	---	---	1	9	15	4
NP_009011	LSM6	NP_084421	Lsm6	XP_001070778	---	3	-	1	2
NP_002485	NDUFC1	NP_079799	Ndufc1	XP_001056178	---	7	1	-	2
NP_055062	RAPGEF2	NP_001093094	Rapgef2	XP_001069856	Rapgef2_predicted	1	-	-	-
NP_203751	---	NP_001028473	6330505N24Rik	XP_001065975	RGD1311955_predicted	-	-	-	-
NP_065897	SLAIN2	NP_705795	Slain2	XP_001076917	RGD1311593_predicted	2	2	-	7
XP_049078	KIAA1239	XP_132047	3110047P20Rik	XP_001078520	RGD1563065_predicted	1	6	-	-
NP_065854	KLHL8	NP_848856	Klhl8	XP_001065538	Klhl8_predicted	-	4	-	-
NP_001020787	ARHGAP24	NP_083546	Arhgap24	NP_001012032	Arhgap24	1	15	-	4
NP_079408	WDR19	NP_700440	Wdr19	XP_001078220	Wdr19_predicted	-	17	-	1
NP_003594	SORBS2	---	Sorbs2	NP_446222	Argbp2	1	4	14	4
NP_055945	TBC1D9	NP_082034	Tbc1d9	XP_001073298	RGD1308221_predicted	4	2	3	6
NP_056002	---	NP_766298	2310045A20Rik	XP_001055920	RGD1562860_predicted	5	-	-	-
NP_001009555	---	NP_001075883	Sh3d19	XP_001072742	RGD1304885_predicted	1	-	-	2
NP_660306	SPATA18	XP_001479001	Spata18	NP_955406	Spata18	-	3	-	-
NP_001095876	ALPK1	XP_001479553	Alpk1	XP_001076258	Alpk1_predicted	-	-	-	-
NP_064610	STOX2	NP_780371	Stox2	XP_001055554	---	-	4	2	-
NP_001032519	RUFY3	NP_081806	Rufy3	NP_001020298	---	1	-	14	4
NP_036429	G3BP2	NP_001074263	G3bp2	NP_001014011	RGD1309571	2	-	-	3
NP_066023	ZFYVE28	NP_001015039	Zfyve28	XP_001064974	Zfyve28_predicted	-	-	2	1
NP_065773	---	XP_287460	C530008M17Rik	XP_001076105	RGD1311575_predicted	-	2	1	-
NP_061859	SH3TC1	NP_919325	Sh3tc1	XP_001057749	Sh3tc1_predicted	-	2	1	5
NP_849157	---	---	D630040G17Rik	XP_001074445	RGD1560620_predicted	13	14	2	1
NP_660333	GPR125	XP_132089	Gpr125	XP_001057272	Gpr125_predicted	12	1	9	-
XP_039169	---	NP_067391	9630031F12Rik	XP_001058964	RGD1564950_predicted	6	-	13	9
NP_001212	CAMK2D	NP_001020609	Camk2d	NP_036651	Camk2d	1	-	3	-
NP_001092104	---	NP_620704	BC013481	NP_001005882	RGD1359713	-	1	-	1
NP_001035292	PAQR3	NP_940814	Paqr3	NP_001012033	Paqr3	4	-	14	1
NP_114117	C1QTNF7	NP_780634	C1qtnf7	XP_001060132	C1qtnf7_predicted	3	2	1	7
NP_001006656	---	NP_705763	BC035537	XP_001061521	---	1	4	15	4
NP_036450	LETM1	NP_062668	Letm1	NP_001005884	Letm1	3	-	1	4
NP_694540	NFXL1	NP_598682	Nfxl1	XP_001057325	RGD1359201	2	-	2	1
NP_699174	ENPP6	NP_796278	Enpp6	XP_001056025	Enpp6_predicted	-	-	-	1
NP_001035247	KIAA1712	NP_001009951	BC088983	NP_001032258	RGD1308517	-	-	1	-
NP_003706	---	NP_062363	---	NP_062252	Vdp	2	16	17	3
NP_001986	ACSL1	NP_032007	Acsl1	NP_036952	Acsl1	1	-	-	-
NP_006008	PROM1	NP_032961	Prom1	NP_068519	Prom1	5	-	12	4
NP_003206	TEC	NP_038717	Tec	XP_001069086	---	3	1	17	4
NP_079176	PHF17	NP_758507	Phf17	XP_001063425	Phf17_predicted	-	5	-	5
NP_861522	---	NP_776126	A230062G08Rik	XP_344231	RGD1311135_predicted	3	2	-	2
NP_005268	GPM6A	NP_705809	Gpm6a	NP_835206	Gpm6a	1	-	-	-
NP_112740	HNRPDL	NP_057899	Hnrpdl	NP_001028868	Hnrpdl	20	11	26	5
NP_001035809	ABCE1	NP_056566	Abce1	XP_001064797	Abce1	3	1	1	3
NP_710153	LCORL	NP_742165	Lcorl	XP_001058603	RGD1561241_predicted	2	-	2	10
NP_115808	ABLIM2	NP_808346	Ablim2	NP_001001514	Ablim2	9	1	-	-
NP_001010874	---	NP_722496	Srd5a2l2	XP_001065402	Srd5a2l2_predicted	-	-	-	-
NP_699196	TAPT1	NP_776125	Tapt1	XP_001059604	RGD1309656_predicted	1	1	5	4
NP_036293	FBXL5	NP_848844	Fbxl5	XP_001060082	Fbxl5_predicted	4	1	-	-
NP_001020095	EXOC1	NP_081546	Exoc1	NP_001019941	Sec3l1	-	3	-	-
NP_004430	EPHA5	NP_031963	Epha5	XP_001075222	Epha5	-	-	15	1
NP_002030	GAB1	NP_067331	Gab1	XP_001070145	Gab1_predicted	-	3	1	-
NP_660208	SPATA5	NP_067318	Spata5	XP_001069059	Spata5_predicted	24	1	1	3
NP_000817	GRIA2	NP_001034284	Gria2	NP_001077280	Gria2	-	-	-	1
NP_006250	PRKG2	NP_032952	Prkg2	NP_037144	Prkg2	-	-	-	1
NP_001013644	FAM53A	NP_848477	2410018C17Rik	XP_001062281	RGD1563315_predicted	-	-	9	5
NP_689831	BBS12	NP_001008502	Bbs12	XP_001068963	RGD1561608_predicted	-	-	1	-
NP_071437	SLC39A8	NP_080504	Slc39a8	NP_001011952	Slc39a8	4	1	-	-
NP_001026902	YTHDC1	NP_808348	A730098D12Rik	NP_596914	Yt521	6	1	-	5
NP_114159	SNX25	NP_997096	Snx25	XP_001061047	Snx25	2	1	-	-
NP_060203	PIGG	NP_001074703	Pigg	XP_001060543	RGD1560335_predicted	-	-	-	-
NP_006865	ELF2	NP_075991	Elf2	NP_001012181	Elf2	2	-	-	4
NP_001004356	FGFRL1	NP_473412	Fgfrl1	NP_954545	Fgfrl1	-	4	30	-
NP_689893	TMEM154	NP_796234	Tmem154	XP_001066314	RGD1563262_predicted	-	-	13	1
NP_443096	---	NP_660115	---	NP_001014066	---	3	-	-	-
NP_076995	ELOVL6	NP_569717	Elovl6	NP_599210	Elovl6	-	-	19	11
NP_001028219	NPNT	NP_001025007	Npnt	XP_001075443	---	5	-	-	3
NP_000847	GUCY1A3	NP_068696	Gucy1a3	NP_058786	Gucy1a3	-	-	1	7
NP_003350	UGDH	NP_033492	Ugdh	NP_112615	Ugdh	-	1	6	-
NP_001074	PDE5A	NP_700471	Pde5a	NP_598268	Pde5a	14	1	-	1
NP_001820	CLCN3	NP_031737	Clcn3	NP_445815	Clcn3	2	-	1	5
NP_004675	SPARCL1	NP_034227	Sparcl1	NP_037078	Sparcl1	27	-	-	4
NP_004818	ABCG2	NP_036050	Abcg2	NP_852046	Abcg2	1	1	-	-
NP_060548	LARP2	NP_001035489	Larp2	NP_001014058	RGD1307509	4	1	1	4
NP_004353	CLGN	NP_034034	Clgn	XP_001063487	---	-	3	-	1
NP_060596	TMEM33	NP_083251	Tmem33	NP_001029370	Tmem33	3	1	-	3
NP_001091947	GRSF1	NP_001091946	Grsf1	XP_001073361	Grsf1	-	1	-	-
NP_068746	GUF1	NP_766299	Guf1	XP_001077422	RGD1310774_predicted	2	1	-	3
NP_060063	BMP2K	NP_542439	Bmp2k	---	---	2	1	-	2
NP_037499	ANAPC4	NP_077175	Anapc4	XP_001054052	Anapc4	-	-	7	3
NP_003255	TLR2	NP_036035	Tlr2	NP_942064	Tlr2	8	2	3	6
NP_000815	GLRB	NP_034428	Glrb	NP_445748	Glrb	-	-	-	1
NP_689895	RWDD4A	NP_987103	Rwdd4a	NP_001030166	---	3	4	25	3
NP_000661	ADH4	NP_036126	Adh4	NP_058966	Adh4	1	-	22	-
NP_003319	TXK	NP_038726	Txk	NP_001019426	Txk	10	2	3	6
NP_002407	CXCL9	NP_032625	Cxcl9	NP_663705	Cxcl9	-	-	-	6
NP_000851	HPGD	NP_032304	Hpgd	NP_077366	Hpgd	1	1	1	2
NP_444272	HTRA3	NP_001036080	Htra3	XP_001058037	Htra3_predicted	5	2	-	7
NP_116106	---	NP_766303	A230097K15Rik	NP_001020841	---	7	-	-	-
NP_000078	CNGA1	NP_031749	Cnga1	NP_445949	Cnga1	1	-	-	1
NP_061169	PRDM5	NP_081823	Prdm5	---	---	-	-	-	-
NP_079363	---	NP_663535	C130090K23Rik	XP_001076815	RGD1310958_predicted	1	14	39	1
NP_000848	GUCY1B3	NP_059497	Gucy1b3	NP_036901	Gucy1b3	11	1	1	7
NP_078787	C4orf15	NP_666271	BC023882	XP_001057582	---	2	11	-	13
NP_001864	CPE	NP_038522	Cpe	NP_037260	Cpe	-	-	-	7
NP_060102	CDKN2AIP	NP_765995	Cdkn2aip	NP_001014022	RGD1305302	2	1	-	5
NP_835236	HSD17B13	NP_932147	Hsd17b13	NP_001009684	Hsd17b13	1	-	-	8
NP_055988	TBC1D1	NP_062610	Tbc1d1	XP_001071842	Tbc1d1_predicted	-	2	20	1
NP_059122	NUP54	NP_899248	Nup54	NP_059057	Nup54	2	1	1	3
NP_001254	CDS1	NP_775546	Cds1	NP_112521	Cds1	-	2	-	6
NP_001007076	KLHL5	NP_780383	Klhl5	NP_001040558	Klhl5	1	-	2	4
NP_003934	---	NP_780305	D5Ertd593e	NP_001014010	RGD1311800	2	-	-	-
NP_057312	AADAT	NP_035964	Aadat	NP_058889	Aadat	1	9	1	4
NP_005340	RBPJ	NP_001074396	Rbpj	XP_001053717	---	2	13	9	-
NP_115689	C4orf14	NP_062810	2610024G14Rik	NP_001006960	RGD1359460	-	10	9	-
NP_078868	---	NP_065636	Srd5a2l	NP_001014012	RGD1308828	-	2	2	-
NP_060718	NEIL3	NP_666320	Neil3	XP_001057215	Neil3_predicted	30	2	32	10
NP_067647	RXFP1	NP_997617	Rxfp1	NP_958820	Lgr7	14	-	19	1
NP_000125	FABP2	NP_032006	Fabp2	NP_037200	Fabp2	-	-	-	-
NP_775807	GABRG1	NP_034382	Gabrg1	NP_542153	Gabrg1	14	-	-	1
NP_006415	SLC34A2	NP_035532	Slc34a2	NP_445832	Slc34a2	-	-	6	6
NP_000316	PITX2	NP_001035967	Pitx2	NP_001035970	Pitx2	1	2	-	1
NP_005654	WHSC2	NP_036044	Whsc2	NP_001008340	Whsc2	7	1	2	4
NP_000883	KLKB1	NP_032481	Klkb1	NP_036857	---	1	2	-	8
NP_653322	THAP6	XP_980323	Thap6	XP_001071562	Thap6_predicted	-	-	11	5
NP_001026890	GSTCD	NP_080507	Gstcd	XP_001077343	RGD1311822_predicted	-	1	1	-
NP_002190	IRF2	NP_032417	Irf2	NP_001040551	Irf2_predicted	-	2	37	-
NP_997213	NPAL1	NP_001074674	Npal1	XP_001077025	Npal1_predicted	1	6	-	-
NP_000194	IDUA	NP_032351	Idua	---	---	11	-	-	2
NP_058626	STX18	NP_081235	Stx18	NP_001012151	Stx18	-	-	1	2
NP_056208	---	NP_663537	9130213B05Rik	NP_775137	Cipar1	-	-	5	7
NP_078881	ARHGAP10	NP_084389	Arhgap10	XP_001065757	---	1	-	37	-
NP_612398	FAM114A1	NP_080943	9130005N14Rik	XP_001078310	RGD1560201_predicted	2	-	-	3
NP_066012	---	NP_964000	G430022H21Rik	XP_001075415	RGD1304822_predicted	4	5	-	5
NP_001004056	GRK4	NP_001074212	Gprk2l	NP_075217	Gprk2l	-	8	29	-
NP_004444	ETFDH	NP_080070	Etfdh	NP_942037	Etfdh	1	3	-	8
NP_001014447	CPZ	NP_694747	Cpz	NP_113954	Cpz	-	2	2	-
NP_079285	CEP135	NP_950197	Cep135	XP_001076228	RGD1310726_predicted	12	-	1	4
NP_663761	TIGD2	NP_001074614	Tigd2	---	---	4	8	2	4
NP_005420	VEGFC	NP_033532	Vegfc	NP_446105	Vegfc	21	2	-	-
NP_689896	CCDC111	NP_001001184	Ccdc111	XP_001060721	RGD1562119_predicted	4	-	4	-
NP_689755	PPM1K	NP_780732	Ppm1k	XP_001064332	Ppm1k_predicted	-	-	-	4
NP_000018	AGA	NP_001005847	Aga	NP_001026811	Aga	2	12	22	-
NP_000789	DRD5	NP_038531	Drd5	NP_036900	Drd5	-	-	4	1
NP_004345	CCNG2	NP_031661	Ccng2	XP_001063045	Ccng2_predicted	6	1	1	-
NP_005949	MTNR1A	NP_032665	Mtnr1a	XP_001061841	Mtnr1a	-	-	-	1
NP_001125	AFP	NP_031449	Afp	NP_036625	Afp	1	-	26	-
NP_003331	UBE2D3	NP_079632	Ube2d3	NP_112516	Ube2d3	2	3	-	8
NP_001124	AFM	NP_660128	Afm	NP_758823	Afm	1	-	1	-
NP_003093	SOD3	NP_035565	Sod3	NP_037012	Sod3	9	3	1	6
NP_036312	FBXO8	NP_056606	Fbxo8	NP_001012050	Fbxo8	4	1	14	4
NP_067027	ENOPH1	NP_080697	Enoph1	NP_001009391	RGD1309016	3	2	-	13
NP_001003688	SMAD1	NP_032565	Smad1	NP_037262	Smad1	1	3	6	-
NP_076429	RASL11B	NP_081154	Rasl11b	NP_001002830	---	-	5	1	5
NP_640336	---	NP_033376	Tenr	NP_001006978	---	2	3	4	1
NP_077285	TNIP2	NP_620703	Tnip2	NP_001019942	Tnip2	1	-	5	5
NP_001017405	MAEA	NP_067475	Maea	NP_001008320	Maea	3	3	34	4
NP_005132	FGB	NP_862897	Fgb	NP_064456	Fgb	3	9	-	4
NP_715638	NAP1L5	NP_067407	Nap1l5	NP_001037758	---	-	-	-	-
NP_612208	GNPDA2	NP_001033104	Gnpda2	XP_001077409	Gnpda2_predicted	2	-	-	9
NP_001036249	---	NP_796204	4932413O14Rik	XP_001070834	RGD1308523_predicted	1	-	22	4
NP_819056	OTOP1	NP_766297	Otop1	NP_852098	Otop1	22	-	-	1
NP_001001290	SLC2A9	NP_001012363	Slc2a9	XP_001062303	---	1	1	1	-
NP_005318	HADH	NP_032238	Hadh	NP_476534	Hadhsc	1	1	1	4
XP_001127662	FREM3	XP_911424	Frem3	XP_001074070	RGD1562701_predicted	11	-	-	-
NP_001012750	DCTD	NP_848903	Dctd	NP_001013904	---	2	-	6	-
NP_036577	SPON2	NP_598664	Spon2	NP_612542	Spon2	-	4	-	1
NP_001093253	C4orf33	NP_001093255	D3Ertd751e	NP_001009707	RGD1359508	4	-	-	-
NP_000574	GC	NP_032122	Gc	NP_036696	Gc	1	3	24	8
NP_115702	TMEM175	NP_082499	Tmem175	NP_001014013	RGD1309712	2	-	29	4
NP_004748	SCYE1	NP_031952	Scye1	NP_446209	Scye1	3	10	-	2
NP_006789	UGT2A1	NP_444414	Ugt2a1	NP_071564	Ugt2a1	-	-	19	-
NP_060822	---	NP_079741	1810029B16Rik	XP_001073162	RGD1305222_predicted	6	-	1	3
NP_001017369	SC4MOL	NP_079712	Sc4mol	NP_543162	Sc4mol	4	18	16	11
NP_114162	TTC29	NP_898919	Ttc29	NP_001013912	---	4	-	-	1
NP_001025169	SLC10A7	NP_001009980	Slc10a7	NP_001010948	---	-	1	2	-
NP_006850	LIAS	NP_077791	Lias	NP_001012037	Lias	-	-	26	-
NP_060945	TMEM165	NP_035756	Tmem165	NP_001019973	Tparl	3	2	2	4
NP_055291	PDLIM3	NP_058078	Pdlim3	NP_446102	Pdlim3	21	-	-	7
NP_005642	TDO2	NP_064295	Tdo2	NP_071798	Tdo2	1	-	-	8
NP_057329	HSD17B11	NP_444492	Hsd17b11	NP_001004209	Dhrs8	4	-	-	4
NP_001217	CASP6	NP_033941	Casp6	NP_113963	Casp6	-	3	1	-
NP_001145	ANXA5	NP_033803	Anxa5	NP_037264	Anxa5	3	2	-	6
NP_653172	CNOT6L	NP_659159	Cnot6l	XP_001062857	Cnot6l_predicted	1	1	15	4
NP_000573	SPP1	NP_033289	Spp1	NP_037013	Spp1	12	2	-	6
NP_000500	FGG	NP_598623	Fgg	NP_036691	Fgg	3	2	-	8
NP_060829	C4orf20	NP_619609	1810047C23Rik	NP_001014164	RGD1311161	2	8	-	-
NP_150638	MRFAP1	NP_080518	Mrfap1	NP_001009264	Mrfap1	3	-	23	2
NP_002660	PLRG1	NP_058064	Plrg1	NP_068525	Plrg1	3	9	1	3
NP_068747	SPCS3	NP_083977	Spcs3	XP_001056922	---	2	-	17	3
NP_001008925	RCHY1	NP_080833	Rchy1	NP_001007619	Rchy1	2	1	1	3
NP_001170	ART3	NP_859417	Art3	NP_001012034	Art3	-	3	13	9
NP_079472	GRPEL1	NP_077798	Grpel1	NP_077813	Grpel1	2	2	-	-
NP_996802	ARL9	NP_996818	Arl9	NP_997624	Arl9	14	1	-	1
XP_379250	---	NP_001028630	Gm1673	XP_001060644	RGD1560394_predicted	1	-	-	1
NP_898898	CYP2U1	NP_082092	Cyp2u1	NP_001019950	Cyp2u1	4	2	-	-
NP_001083053	---	XP_127414	1700001L19Rik	XP_001063171	RGD1308544_predicted	-	-	-	1
NP_061731	PCDHA5	NP_034089	Pcdha5	NP_955799	---	-	-	34	1
NP_061732	PCDHA6	NP_031793	Pcdha6	NP_955800	---	-	-	34	7
NP_940968	C5orf34	NP_080403	4833420G17Rik	NP_001014059	RGD1306227	-	-	-	1
NP_001009185	ACSL6	NP_001028769	Acsl6	NP_570095	Acsl6	7	-	-	-
NP_001704	BHMT	NP_057877	Bhmt	NP_110477	Bhmt	1	-	-	8
NP_001026982	CSNK1G3	NP_690022	Csnk1g3	NP_074046	Csnk1g3	2	1	1	5
NP_005556	LCP2	NP_034826	Lcp2	NP_569105	Lcp2	5	2	3	6
NP_076996	FASTKD3	NP_081399	Fastkd3	NP_001076043	RGD1309729	2	1	-	3
NP_002193	ISL1	NP_067434	Isl1	NP_059035	Isl1	-	1	28	1
NP_000807	GABRG2	NP_032099	Gabrg2	NP_899156	Gabrg2	10	-	4	1
NP_004698	ATG12	NP_080493	Atg12	NP_001033584	Atg12	3	3	-	-
NP_002178	IL12B	NP_032378	Il12b	NP_072133	Il12b	-	-	-	1
NP_004228	TRIP13	NP_081458	Trip13	NP_001011930	Trip13	-	11	2	10
NP_000791	FGF1	NP_034327	Fgf1	NP_036978	Fgf1	-	1	19	-
NP_001936	HBEGF	NP_034545	Hbegf	NP_037077	Hbegf	17	-	-	5
NP_001035541	RUFY1	NP_766145	Rufy1	XP_001071405	Rufy1	-	10	26	5
NP_776190	---	NP_080351	3110031B13Rik	NP_001008374	RGD1305356	29	3	2	1
NP_699192	---	NP_780747	E130304F04Rik	XP_001076547	RGD1308116_predicted	1	5	1	9
NP_071423	EPB41L4A	NP_038540	Epb4.1l4a	XP_001060647	Epb4.1l4a_predicted	3	17	-	-
NP_005633	TAF7	NP_036031	Taf7	XP_001065779	Taf7_predicted	2	-	1	9
NP_005838	SLC23A1	NP_035527	Slc23a1	NP_059011	Slc23a1	-	-	1	-
NP_004567	PPP2R2B	NP_081807	Ppp2r2b	NP_071545	Ppp2r2b	5	7	9	6
NP_004159	SDHA	NP_075770	Sdha	NP_569112	Sdha	1	-	1	4
NP_006781	MYOT	NP_001028793	Myot	XP_001053135	Myot_predicted	-	-	-	1
NP_001736	CAMLG	NP_031622	Caml	NP_445786	Camlg	2	1	-	3
NP_002440	MSX2	NP_038629	Msx2	NP_037114	Msx2	10	2	4	1
NP_005511	HNRPH1	NP_067485	Hnrph1	NP_543172	Hnrph1	-	1	30	-
NP_659486	UBLCP1	NP_077795	Ublcp1	NP_001014139	Ublcp1	3	-	1	3
XP_496738	---	NP_808265	AK162044	XP_001064047	RGD1559945_predicted	-	-	-	1
---	---	NP_079865	Rpl36al	NP_112367	---	3	3	17	2
XP_293903	---	NP_001004147	AI595406	XP_001065126	RGD1562841_predicted	-	-	-	-
NP_001025057	PFN3	NP_083579	Pfn3	XP_001065833	---	16	1	-	1
NP_937793	ARSK	NP_084123	Arsk	NP_001041382	Arsk	1	-	6	12
NP_620164	CMBL	NP_853619	Cmbl	NP_001008770	RGD1306952	1	2	-	8
NP_612501	PRELID2	NP_084218	Prelid2	XP_001060034	---	-	-	-	-
NP_060504	WDR70	NP_001074871	Wdr70	NP_001013931	RGD1309487	16	-	15	4
NP_060217	ANKHD1	---	Ankhd1	---	---	-	1	11	-
NP_001781	CDC25C	NP_033990	Cdc25c	XP_001061940	Cdc25c_predicted	-	-	2	-
NP_037415	MAT2B	NP_598778	Mat2b	NP_001037747	---	4	1	-	-
NP_057306	DDX41	NP_598820	Ddx41	XP_001059856	RGD1559513_predicted	9	-	-	2
NP_114172	CCNB1	XP_001005050	EG434175	NP_741988	Ccnb1	-	2	2	10
NP_005566	LNPEP	NP_766415	Lnpep	NP_598258	Lnpep	7	-	-	-
NP_001035530	CCDC112	XP_140320	Ccdc112	XP_001054026	RGD1561942_predicted	-	2	1	-
NP_001728	C9	NP_038513	C9	NP_476487	C9	-	-	-	4
NP_004408	DUSP1	NP_038670	Dusp1	NP_446221	Dusp1	20	5	40	5
NP_000015	ADRB2	NP_031446	Adrb2	NP_036624	Adrb2	20	5	5	5
NP_004763	C5orf13	NP_444308	D0H4S114	NP_835197	Nrep	1	-	1	11
NP_001078955	SEPP1	NP_001036078	Sepp1	NP_001077380	Sepp1	1	-	1	-
NP_002189	IRF1	NP_032416	Irf1	NP_036723	Irf1	26	5	31	5
NP_001020276	CSNK1A1	NP_666199	Csnk1a1	NP_446067	Csnk1a1	23	1	-	-
NP_060084	BHMT2	NP_075022	Bhmt2	NP_001014278	---	1	-	-	8
NP_116565	---	NP_598894	2010002N04Rik	NP_775149	Nid67	-	2	-	5
NP_004878	CXCL14	NP_062514	Cxcl14	NP_001013155	Cxcl14	3	2	-	7
NP_002100	HARS	NP_032240	Hars	NP_001020585	Dnd1	3	3	1	2
NP_115495	GPR98	NP_473394	Gpr98	---	---	1	-	19	-
NP_001438	FAT2	NP_001025159	Fat2	NP_075243	Fath2	3	-	-	-
NP_001360	DNAH5	NP_579943	Dnahc5	XP_001065087	Dnahc5	-	13	-	1
NP_004376	VCAN	NP_001074718	Vcan	XP_001058160	Cspg2	8	2	5	6
NP_835260	PDZD2	NP_001074533	Pdzd2	NP_075229	Pdzk3	-	1	20	1
NP_003874	HDAC3	NP_034541	Hdac3	NP_445900	Hdac3	29	9	-	2
NP_009049	TRIO	---	Trio	XP_001058824	Trio	1	-	-	-
NP_005900	MAP1B	NP_032660	Mtap1b	XP_001061557	Map1b	12	7	-	-
NP_071900	NSD1	NP_032765	Nsd1	XP_001066374	---	-	5	-	5
NP_001096045	SNAG1	NP_570614	Snag1	XP_001075253	Snag1_predicted	4	6	4	1
NP_001035248	H2AFY	NP_036145	H2afy	NP_058878	H2afy	3	1	-	4
NP_001534	NDST1	NP_032332	Ndst1	NP_077337	Ndst1	2	-	-	11
NP_000804	GABRB2	---	Gabrb2	NP_037089	Gabrb2	22	-	1	1
NP_000512	HEXB	NP_034552	Hexb	NP_001011946	Hexb	4	-	1	-
NP_056199	NIPBL	NP_081983	Nipbl	XP_001054897	NIPBL	-	1	-	3
NP_005659	ST8SIA4	NP_033209	St8sia4	XP_001071501	---	4	2	3	6
NP_115662	MED10	NP_613062	Med10	XP_001062474	RGD1310128_predicted	3	1	1	12
NP_085130	CPEB4	NP_080528	Cpeb4	XP_001062356	---	7	3	-	4
NP_001037	SLC12A2	NP_033220	Slc12a2	NP_113986	Slc12a2	2	1	25	3
NP_059111	KLHL3	XP_354754	---	XP_573982	RGD1565218_predicted	3	13	-	3
NP_056103	PHF15	NP_955003	Phf15	XP_001073159	Phf15_predicted	-	-	1	9
NP_075525	ADAM19	NP_033746	Adam19	XP_001068897	---	7	2	1	9
NP_852556	PIK3R1	NP_001020126	Pik3r1	NP_037137	Pik3r1	8	14	-	-
NP_055548	ZFYVE16	NP_775568	Zfyve16	XP_001058708	RGD1564784_predicted	2	1	2	4
NP_000037	ARSB	---	Arsb	NP_254278	Arsb	-	-	-	-
NP_001261	CHD1	NP_031716	Chd1	XP_001056703	Chd1_predicted	2	1	1	5
NP_006194	PDE4D	NP_035186	Pde4d	NP_058728	Pde4d	14	6	-	-
NP_005723	RAD50	NP_033038	Rad50	NP_071582	Rad50	-	5	30	5
NP_006624	IQGAP2	NP_081987	Iqgap2	---	---	1	-	1	12
NP_055572	MAML1	NP_780543	Maml1	XP_001071703	Maml1_predicted	9	8	2	4
NP_705835	---	NP_084146	A930001N09Rik	XP_001064739	RGD1310862_predicted	1	1	1	2
NP_001323	CTNND2	NP_032755	Ctnnd2	XP_001064375	Ctnnd2	-	3	-	-
NP_002194	ITGA2	NP_032422	Itga2	XP_001075558	Itga2	2	-	-	3
NP_001035548	---	NP_109636	---	NP_110463	Arts1	2	1	-	-
NP_056031	HISPPD1	NP_776121	Hisppd1	NP_001020946	---	2	1	-	13
NP_002301	LIFR	NP_038612	Lifr	NP_112310	Lifr	6	2	12	4
NP_060010	GALNT10	NP_598950	Galnt10	NP_570098	Galnt10	4	2	-	-
NP_001873	CRHBP	NP_940800	Crhbp	NP_631922	Crhbp	-	3	-	-
NP_002075	GPX3	NP_001077398	Gpx3	NP_071970	Gpx3	1	2	-	-
NP_060813	RIOK2	NP_080210	Riok2	NP_001009687	Riok2	2	1	1	3
NP_570123	ACOT12	NP_083066	Acot12	NP_570103	Acot12	1	1	18	4
NP_113670	ATG10	NP_080046	Atg10	XP_001065140	---	-	-	-	12
NP_073599	RMND5B	NP_079622	Rmnd5b	NP_001017473	---	15	-	1	2
NP_006308	BASP1	NP_081671	Basp1	NP_071636	Basp1	5	3	-	6
NP_149111	NKD2	NP_082462	Nkd2	XP_001060476	Nkd2_predicted	1	-	-	1
NP_065717	CLK4	NP_031740	Clk4	NP_001013059	Clk4	4	1	-	5
NP_001173	ALDH7A1	NP_613066	Aldh7a1	XP_001059375	Aldh7a1	1	-	-	-
NP_004490	HNRPAB	NP_001041526	Hnrpab	NP_112620	Hnrpab	1	4	26	5
NP_001875	HAPLN1	NP_038528	Hapln1	NP_062062	Hapln1	-	4	-	1
NP_005442	PDLIM7	NP_080407	Pdlim7	NP_775148	Pdlim7	-	-	6	-
NP_000162	GLRA1	NP_065238	Glra1	NP_037265	Glra1	10	-	-	1
NP_001795	CDX1	NP_034010	Cdx1	XP_001062129	Cdx1_predicted	-	-	-	1
NP_219482	ZNF622	NP_653106	Zfp622	NP_001009652	Zfp622	-	5	1	5
NP_938023	TMEM173	XP_128954	2610307O08Rik	XP_001062602	RGD1562552_predicted	-	2	4	1
NP_001091742	HMGCS1	NP_666054	Hmgcs1	NP_058964	Hmgcs1	-	-	16	11
NP_006152	NEUROG1	NP_035026	Neurog1	NP_062080	Neurod3	3	2	-	1
NP_005014	PGGT1B	NP_766215	Pggt1b	NP_112344	Pggt1b	2	-	-	-
NP_003392	XRCC4	NP_082288	Xrcc4	NP_001007000	Xrcc4	2	-	22	-
NP_775760	---	---	4930455B06Rik	NP_001041373	RGD1305413	-	2	-	1
NP_055858	TBC1D9B	NP_084021	Tbc1d9b	XP_001070650	RGD1310147_predicted	29	9	-	4
NP_055454	KIAA0372	NP_001074821	AK129128	XP_001059136	RGD1306062_predicted	2	1	1	3
NP_112217	ADAMTS12	NP_780710	Adamts12	XP_001059671	Adamts12_predicted	-	-	-	-
NP_006242	PRKAA1	NP_001013385	Prkaa1	NP_062015	Prkaa1	2	-	1	-
NP_001093205	CKMT2	NP_940807	Ckmt2	---	Ckmt2	-	3	-	1
NP_001378	DPYSL3	NP_033494	Dpysl3	NP_037066	Dpysl3	5	1	-	-
NP_001953	EFNA5	NP_034239	Efna5	NP_446355	Efna5	-	-	-	2
NP_000328	SGCD	NP_036021	Sgcd	XP_001069547	---	-	2	-	1
NP_001009877	BRD9	NP_001019679	Brd9	XP_217740	Brd9_predicted	7	2	7	4
NP_001035024	ANKRD55	NP_084174	Ankrd55	XP_001066855	RGD1307735_predicted	1	-	12	-
NP_001792	CDO1	NP_149026	Cdo1	NP_434696	Cdo1	3	1	-	-
NP_000347	TCOF1	NP_035682	Tcof1	XP_001061846	Tcof1_predicted	3	1	8	4
NP_057065	CAMK2A	NP_033922	Camk2a	NP_037052	Camk2a	4	-	8	1
NP_699204	AGXT2L2	NP_082674	Agxt2l2	---	---	-	-	1	4
NP_003624	ENC1	NP_031956	Enc1	NP_001003401	Enc1	-	3	1	2
NP_004589	SPOCK1	NP_033288	Spock1	XP_001067546	Spock1	-	-	-	1
NP_991111	---	XP_127489	4930405M20Rik	XP_001066002	RGD1561110_predicted	-	18	-	4
NP_004128	KCNMB1	NP_112446	Kcnmb1	NP_071539	---	2	-	8	1
NP_002011	FLT4	NP_032055	Flt4	NP_446104	Flt4	2	-	16	11
NP_085044	PRR7	NP_001025467	Prr7	XP_001069340	---	7	-	-	-
NP_057724	MRPS30	NP_067531	Mrps30	XP_001068885	Mrps30_predicted	2	-	1	2
NP_570721	PRRC1	NP_082723	Prrc1	NP_001029059	---	2	-	1	3
NP_001012339	---	XP_001473519	4930461P20Rik	NP_620211	---	3	1	1	3
NP_006252	PROP1	NP_032962	Prop1	NP_705891	Prop1	-	-	5	-
NP_001028284	PAIP2	NP_080696	Paip2	NP_001014170	---	-	1	22	1
NP_660308	CCDC127	NP_077163	Ccdc127	NP_942061	RGD735106	-	1	-	5
NP_115656	ZCCHC9	NP_663428	Zcchc9	NP_001013174	Zcchc9	2	-	-	-
NP_036436	FBXL7	NP_795933	Fbxl7	XP_001064103	Fbxl7_predicted	5	-	1	-
NP_036475	NNT	NP_032736	Nnt	NP_001013175	---	4	-	21	-
NP_004857	SCAMP1	NP_083429	Scamp1	XP_001059581	Scamp1	4	8	-	-
NP_004923	CDH6	NP_031692	Cdh6	NP_037059	Cdh6	5	-	-	1
NP_055428	UBXD8	NP_848484	Ubxd8	NP_001017445	Ubxd8	3	2	-	-
NP_060516	AGGF1	NP_079906	Aggf1	XP_001060407	Aggf1	2	1	11	5
NP_000850	HMGCR	NP_032281	Hmgcr	NP_037266	Hmgcr	1	4	12	11
NP_075048	RANBP17	NP_075635	Ranbp17	XP_001064524	RGD1562576_predicted	14	-	2	-
NP_000154	GHR	NP_001041612	Ghr	NP_058790	Ghr	1	1	1	4
NP_110420	FBXO38	NP_598897	Fbxo38	XP_001059463	Fbxo38_predicted	4	1	-	3
NP_002430	MSH3	NP_034959	Msh3	XP_001065837	---	-	17	1	1
NP_055760	ABLIM3	NP_941051	Ablim3	XP_001058944	RGD1565118_predicted	3	18	-	2
NP_064502	LARS	NP_598898	Lars	NP_001009637	Lars	2	1	1	3
NP_001032409	CYFIP2	NP_598530	Cyfip2	XP_001068689	Cyfip2_predicted	-	1	4	1
NP_005981	STK10	NP_033314	Stk10	XP_001064952	Stk10	24	2	5	6
NP_036432	FBXW11	NP_598776	Fbxw11	XP_001063835	Fbxw11_predicted	-	-	-	3
NP_004289	NUP155	NP_573490	Nup155	NP_446404	Nup155	2	-	1	3
NP_057228	COMMD10	NP_848464	Commd10	NP_001004276	Commd10	2	2	2	10
NP_115743	ZBED3	NP_082382	Zbed3	NP_001020900	Zbed3	8	4	-	-
NP_003305	TTC1	NP_598556	Ttc1	NP_001005529	Ttc1	3	1	1	3
NP_059980	TMED9	NP_080487	Tmed9	NP_001009703	Tmed9	1	3	-	2
NP_006341	FST	NP_032072	Fst	NP_036693	Fst	3	2	-	5
NP_683513	CCL28	NP_064675	Ccl28	NP_446152	Ccl28	-	-	-	1
NP_002055	GLRX	NP_444338	Glrx	NP_071614	Glrx1	3	1	-	-
NP_075053	SLC30A5	NP_075023	Slc30a5	XP_001062806	Slc30a5_predicted	3	9	1	3
NP_056379	LRRTM2	NP_821072	Lrrtm2	XP_001062636	---	-	-	-	1
NP_612388	TIMD4	NP_848874	Timd4	---	---	5	-	-	6
NP_775761	TMEM171	NP_001020777	Tmem171	NP_001013925	---	7	-	1	-
NP_653326	---	XP_001473649	4930401A09Rik	XP_001060041	RGD1564928_predicted	-	3	-	1
NP_542387	---	NP_084252	D11Ertd497e	NP_001008279	RGD1308696	1	-	1	-
NP_037369	PRELID1	NP_079872	Prelid1	NP_001009636	RGD1308082	2	1	1	2
NP_066970	CCNU	NP_001074531	Ccnu	XP_001075020	RGD1565217_predicted	-	2	-	-
NP_689490	UBTD2	NP_776145	Ubtd2	XP_001063674	RGD1305506_predicted	2	2	2	1
NP_001196	BNIP1	NP_742161	Bnip1	NP_543173	Bnip1	1	-	1	-
NP_001035095	TCERG1	NP_001034563	Tcerg1	XP_001068365	Tcerg1_predicted	-	1	1	-
NP_001019820	CANX	NP_031623	Canx	NP_742005	Canx	3	-	22	3
NP_002293	LECT2	NP_034832	Lect2	XP_001068117	Lect2_predicted	1	-	1	-
NP_689835	MIER3	NP_766181	Mier3	XP_001074643	RGD1311241_predicted	11	-	-	1
NP_056053	WWC1	NP_740749	Wwc1	XP_001066364	RGD1308329_predicted	1	8	1	-
NP_112590	MXD3	NP_057871	Mxd3	NP_665716	Mxd3	2	-	25	-
NP_002095	GZMK	NP_032222	Gzmk	NP_058815	Gzmk	5	-	-	6
NP_612462	RAB3C	NP_076341	Rab3c	NP_598220	Rab3c	16	-	-	1
NP_002363	MAN2A1	NP_032575	Man2a1	XP_001068826	Man2a1	2	1	-	-
NP_473368	ANKH	NP_065065	Ank	NP_446166	Ank	-	-	-	-
NP_057302	POLK	NP_036178	Polk	XP_001060864	Polk	2	2	-	1
NP_004356	CETN3	NP_031710	Cetn3	XP_001061358	Cetn3	2	-	2	3
NP_008840	RASGRF2	NP_033053	Rasgrf2	NP_446173	Rasgrf2	1	2	4	1
NP_078853	SH3TC2	NP_766216	Sh3tc2	XP_001059165	RGD1309038	30	4	-	1
NP_996763	OR2V2	NP_666449	Olfr1396	NP_999998	Olr1385_predicted	-	-	-	1
NP_001008221	CPLX2	NP_034076	Cplx2	NP_446330	Cplx2	-	2	1	1
NP_060145	---	NP_001028536	BC040758	XP_001070261	RGD1560576_predicted	-	3	-	1
NP_000578	C7	---	C7	XP_001054007	C7	5	-	-	7
NP_004282	CARTPT	NP_001074962	Cartpt	NP_058806	Cart	11	2	-	1
NP_062545	TAS2R1	NP_065249	Tas2r119	NP_076483	Tas2r1	14	-	-	1
NP_079106	AYTL2	NP_663351	Aytl2	XP_001057012	Aytl2_predicted	12	2	5	6
NP_006135	GZMA	NP_034500	Gzma	NP_703198	Gzma	5	-	3	6
NP_004163	SLC1A3	NP_683740	Slc1a3	NP_062098	Slc1a3	-	-	-	6
NP_000910	PAM	NP_038654	Pam	NP_037132	Pam	6	2	1	7
NP_689616	EGFLAM	NP_848863	Egflam	XP_001054657	RGD1306592_predicted	-	-	-	1
NP_001647	TRIM23	NP_109656	Trim23	XP_001064021	Trim23	2	-	-	3
NP_115788	C5orf32	NP_001074834	0610010O12Rik	XP_001063567	---	-	2	2	-
NP_000870	IL5	NP_034688	Il5	NP_068606	Il5	-	-	-	1
NP_065847	SEMA6A	NP_061214	Sema6a	XP_001054004	Sema6a_predicted	2	2	1	-
NP_001030005	NOLA2	NP_080907	Nola2	XP_001071992	Nola2_predicted	3	-	1	2
NP_036213	ELL2	NP_620403	Ell2	XP_001054852	Ell2	20	4	25	5
NP_073735	FBXL17	XP_001478486	Fbxl17	XP_001071661	Fbxl17_predicted	-	-	-	-
NP_004721	ETF1	NP_659115	Etf1	NP_001008345	Etf1	3	1	1	3
NP_861974	TMED7	---	Tmed7	XP_001054517	Tmed7	2	-	-	3
NP_000056	C6	NP_057913	C6	NP_788263	C6	1	2	24	-
NP_689899	DNAJC18	NP_083945	Dnajc18	NP_001013909	Dnajc18	12	-	-	-
NP_001025022	PDE8B	NP_758467	Pde8b	NP_954889	Pde8b	-	2	1	-
NP_009217	SYNPO	---	Synpo	NP_067727	Synpo	2	6	2	1
NP_055481	CLINT1	NP_001038985	Clint1	NP_001002022	---	2	3	-	3
NP_000949	PTGER4	NP_032991	Ptger4	NP_114465	Ptger4	7	2	-	1
NP_004092	F2RL2	NP_034300	F2rl2	NP_445765	F2rl2	-	7	-	1
NP_005451	SNCAIP	NP_080684	Sncaip	XP_001055030	Sncaip_predicted	-	-	2	1
NP_002145	HSPA4	NP_032326	Hspa4	NP_705893	Hspa4	3	4	-	3
NP_004386	DBN1	NP_062787	Dbn1	NP_112286	Dbn1	12	-	-	6
NP_061161	C5orf3	NP_080618	1810073G14Rik	XP_001074992	---	2	1	40	3
NP_653327	---	NP_083138	3732413I11Rik	XP_001067906	RGD1309561_predicted	8	17	-	-
NP_002445	MTRR	NP_766068	Mtrr	NP_001034092	Mtrr	3	1	31	3
NP_001014990	MRPL22	NP_778166	Mrpl22	XP_001074937	Mrpl22_predicted	3	1	1	2
NP_003723	EIF4EBP3	NP_957708	Eif4ebp3	---	---	-	2	6	-
NP_000505	GDNF	NP_034405	Gdnf	NP_062012	Gdnf	-	-	-	-
NP_002486	NDUFS4	NP_035017	Ndufs4	NP_001020317	---	4	10	6	4
NP_005331	HINT1	NP_032274	Hint1	NP_071528	Hint1	13	3	23	8
NP_005912	MAP3K1	NP_036075	Map3k1	NP_446339	Map3k1	6	6	-	5
NP_001073897	ODZ2	NP_035986	Odz2	NP_064473	Odz2	1	1	-	-
NP_056140	---	XP_358313	BC018507	XP_001062297	RGD1309747_predicted	-	-	-	5
NP_065798	ZNF608	NP_786927	Zfp608	XP_001056026	Zfp608_predicted	-	1	-	3
NP_055897	FSTL4	NP_796033	Fstl4	XP_001072971	Fstl4_predicted	-	2	-	1
NP_938014	LYSMD3	NP_084533	Lysmd3	NP_001009698	Lysmd3	2	1	9	3
XP_035299	ZSWIM6	XP_358311	Zswim6	NP_001041349	Zswim6	17	1	-	5
NP_001334	DAB2	---	Dab2	NP_077073	Dab2	5	-	3	6
NP_000818	GRIA1	NP_032191	Gria1	NP_113796	Gria1	10	1	6	1
NP_003051	SLC22A5	NP_035526	Slc22a5	NP_062142	Slc22a5	19	-	33	4
NP_001073948	---	NP_036156	Rgnef	XP_001069648	Rgnef_predicted	8	-	-	5
NP_002175	IL6ST	NP_034690	Il6st	NP_001008725	Il6st	2	-	23	1
XP_932740	PRDM6	NP_001028453	Prdm6	XP_001058066	RGD1559594_predicted	13	13	-	-
NP_001955	EGR1	NP_031939	Egr1	NP_036683	Egr1	-	-	-	5
NP_000940	PRLR	NP_035299	Prlr	NP_001029283	Prlr	1	13	1	8
NP_037523	DMGDH	NP_083048	Dmgdh	NP_620802	Dmgdh	1	-	1	8
NP_004874	NRG2	XP_001475386	Nrg2	XP_001053475	---	2	2	-	6
NP_057432	C5orf4	---	---	XP_001075174	---	1	-	14	4
NP_775736	COL23A1	NP_700442	Col23a1	NP_853667	Col23a1	24	3	-	1
NP_002106	HK3	NP_001028417	Hk3	NP_071515	Hk3	9	2	4	6
NP_588610	UNC5A	NP_694771	Unc5a	NP_071542	Unc5a	10	13	2	1
NP_644810	WDR36	NP_659112	Wdr36	XP_001060069	---	3	1	1	3
NP_149988	C5orf30	NP_598586	D1Ertd622e	XP_001070947	RGD1562136_predicted	-	1	-	-
NP_002002	FGFR4	NP_032037	Fgfr4	XP_001066753	Fgfr4	3	10	-	-
NP_689763	SH3RF2	NP_766554	Sh3rf2	NP_001029359	Sh3rf2	8	2	-	1
NP_005660	REEP5	NP_031900	Reep5	XP_001060998	Reep5_predicted	7	2	1	5
NP_079143	---	NP_796097	C230086A09Rik	NP_072142	Kpl2	-	3	-	1
NP_005702	EDIL3	NP_001033076	Edil3	XP_001057630	---	1	2	-	1
NP_006613	PLK2	NP_690017	Plk2	NP_114009	Plk2	26	4	-	5
NP_078891	PARP8	---	Parp8	XP_001068789	---	3	2	3	6
NP_000431	PDE6A	NP_666198	Pde6a	XP_001062427	Pde6a_predicted	6	-	-	1
[truncated: 4,457 more rows]
