# Supplementary material for: Meta-analysis of Inter-species Liver Co-expression Networks Elucidates Traits Associated with Common Human Diseases
Source: PLoS Comput Biol. 2009 Dec 18;5(12):e1000616. doi: 10.1371/journal.pcbi.1000616 (PMC2787626; doi:10.1371/journal.pcbi.1000616)
Supplement: Table S11 — Comparison of annotations for GWAS candidate genes based on the conserved modules or human modules. The annotation based on conserved module agrees better with the annotation based on the gene's Gene Ontology annotation. (0.01 MB PDF) [file pcbi.1000616.s019.pdf]

| <b>GWAS Gene</b> | <b>Annotation based on conserved module</b> | <b>Annotation based on human module</b> | <b>GO Biological Process (if the conserved and human module provides different annotation)</b>                   |
|------------------|---------------------------------------------|-----------------------------------------|------------------------------------------------------------------------------------------------------------------|
| ANGPTL3          | carboxylic acid metabolic                   | carboxylic acid metabolic               |                                                                                                                  |
| APOA5            | carboxylic acid metabolic                   | carboxylic acid metabolic               |                                                                                                                  |
| APOE             | carboxylic acid metabolic                   | translation                             | lipid metabolic                                                                                                  |
| GALNT2           | cell-cell signaling                         | carboxylic acid metabolic               | protein amino acid O-linked glycosylation via serine/threonine                                                   |
| HMGCR            | sterol biosynthetic                         | carboxylic acid metabolic               | cholesterol biosynthetic process                                                                                 |
| LDLR             | carboxylic acid metabolic                   | cell proliferation                      | cholesterol metabolic process                                                                                    |
| MAFB             | transcription regulation                    | carboxylic acid metabolic               | positive regulation of transcription from RNA polymerase II promoter                                             |
| TIMD4            | immune response                             | immune response                         |                                                                                                                  |
| TRIB1            | transcription regulation                    | cell proliferation                      | negative regulation of smooth muscle cell proliferation;<br>negative regulation of transcription factor activity |
